# Supplementary material for: Effects of Type 1 Diabetes Risk Alleles on Immune Cell Gene Expression
Source: Genes (Basel). 2017 Jun 21;8(6):167. doi: 10.3390/genes8060167 (PMC5485531; doi:10.3390/genes8060167)
Supplement: Supplementary file 1 [file genes-08-00167-s001.xlsx]

## Sheet: Sheet1
SNPName	Regulated Gene	PValue	Cell Type	Author et al	Cis/Trans	T1D Locus	Position	Alleles	Locus Name
rs2269241	PGM1	2.94e-33	Blood	Westra	cis	1p31.3	64108771	T|C	PGM1
rs2269241	PGM1	0.00062	PMA	Ram	cis	1p31.3	64108771	T|C	PGM1
rs2269241	TP53TG1	2.5e-07	EBV-rest	Ram	trans	1p31.3	64108771	T|C	PGM1
rs2269241	BSDC1	4.03e-07	EBV-rest	Ram	trans	1p31.3	64108771	T|C	PGM1
rs2269241	DECR1	1.58e-06	EBV-rest	Ram	trans	1p31.3	64108771	T|C	PGM1
rs2269241	GINS3	1.93e-06	EBV-rest	Ram	trans	1p31.3	64108771	T|C	PGM1
rs2269241	NEIL2	3.31e-06	EBV-rest	Ram	trans	1p31.3	64108771	T|C	PGM1
rs2269241	BCL11A	3.89e-06	EBV-rest	Ram	trans	1p31.3	64108771	T|C	PGM1
rs2269241	C4orf34	4.14e-06	EBV-rest	Ram	trans	1p31.3	64108771	T|C	PGM1
rs2269241	SEC13	6.37e-06	EBV-rest	Ram	trans	1p31.3	64108771	T|C	PGM1
rs2269241	MYL5	7.34e-06	EBV-rest	Ram	trans	1p31.3	64108771	T|C	PGM1
rs2269241	WIPI1	7.4e-06	EBV-rest	Ram	trans	1p31.3	64108771	T|C	PGM1
rs2269241	BCAT1	7.78e-06	EBV-rest	Ram	trans	1p31.3	64108771	T|C	PGM1
rs2269241	PHB	8.06e-06	EBV-rest	Ram	trans	1p31.3	64108771	T|C	PGM1
rs2269241	C17orf97	8.2e-06	EBV-rest	Ram	trans	1p31.3	64108771	T|C	PGM1
rs2269241	LRRTM1	8.63e-06	EBV-rest	Ram	trans	1p31.3	64108771	T|C	PGM1
rs2269241	SNHG7	1.09e-05	EBV-rest	Ram	trans	1p31.3	64108771	T|C	PGM1
rs2269241	LYZL1	1.21e-05	EBV-rest	Ram	trans	1p31.3	64108771	T|C	PGM1
rs2269241	CD1D	1.22e-05	EBV-rest	Ram	trans	1p31.3	64108771	T|C	PGM1
rs2269241	GDI1	1.43e-05	EBV-rest	Ram	trans	1p31.3	64108771	T|C	PGM1
rs2269241	DEFB32	1.63e-05	EBV-rest	Ram	trans	1p31.3	64108771	T|C	PGM1
rs2269241	KCND2	1.66e-05	EBV-rest	Ram	trans	1p31.3	64108771	T|C	PGM1
rs2269241	TP53TG1	4.33e-07	EBV-rest	Ram	trans	1p31.3	64108771	T|C	PGM1
rs2269241	WDR33	7.21e-08	PMA	Ram	trans	1p31.3	64108771	T|C	PGM1
rs2269241	RPL34	9.7e-08	PMA	Ram	trans	1p31.3	64108771	T|C	PGM1
rs2269241	ZNF786	3.31e-07	PMA	Ram	trans	1p31.3	64108771	T|C	PGM1
rs2269241	OPTN	4.39e-07	PMA	Ram	trans	1p31.3	64108771	T|C	PGM1
rs2269241	C4orf34	6.32e-07	PMA	Ram	trans	1p31.3	64108771	T|C	PGM1
rs2269241	PLOD3	2.62e-06	PMA	Ram	trans	1p31.3	64108771	T|C	PGM1
rs2269241	RPL6	4.19e-06	PMA	Ram	trans	1p31.3	64108771	T|C	PGM1
rs2269241	CCL5	4.79e-06	PMA	Ram	trans	1p31.3	64108771	T|C	PGM1
rs2269241	LOC653748	4.8e-06	PMA	Ram	trans	1p31.3	64108771	T|C	PGM1
rs2269241	C17orf97	5.65e-06	PMA	Ram	trans	1p31.3	64108771	T|C	PGM1
rs2269241	TAOK2	5.89e-06	PMA	Ram	trans	1p31.3	64108771	T|C	PGM1
rs2269241	WDR41	5.97e-06	PMA	Ram	trans	1p31.3	64108771	T|C	PGM1
rs2269241	RPL36	6.03e-06	PMA	Ram	trans	1p31.3	64108771	T|C	PGM1
rs2269241	POLR3B	1.04e-05	PMA	Ram	trans	1p31.3	64108771	T|C	PGM1
rs2269241	ELP3	1.11e-05	PMA	Ram	trans	1p31.3	64108771	T|C	PGM1
rs2269241	ACER1	1.37e-05	PMA	Ram	trans	1p31.3	64108771	T|C	PGM1
rs2269241	WRB	1.39e-05	PMA	Ram	trans	1p31.3	64108771	T|C	PGM1
rs2269241	C17orf97	1.56e-05	PMA	Ram	trans	1p31.3	64108771	T|C	PGM1
rs2269241	METTL13	1.9e-05	PMA	Ram	trans	1p31.3	64108771	T|C	PGM1
rs2269241	PRPS2	2.21e-05	PMA	Ram	trans	1p31.3	64108771	T|C	PGM1
rs2269241	TARBP1	2.25e-05	PMA	Ram	trans	1p31.3	64108771	T|C	PGM1
rs2269241	DNAJB11	2.29e-05	PMA	Ram	trans	1p31.3	64108771	T|C	PGM1
rs2269241	EIF1B	2.35e-05	PMA	Ram	trans	1p31.3	64108771	T|C	PGM1
rs2269241	LOC401321	2.71e-05	PMA	Ram	trans	1p31.3	64108771	T|C	PGM1
rs2269241	SNX3	5.76e-07	CD4	Ram	trans	1p31.3	64108771	T|C	PGM1
rs2269241	LOC285908	6.1e-07	CD8	Ram	trans	1p31.3	64108771	T|C	PGM1
rs2269241	JHDM1D	3.43e-06	CD8	Ram	trans	1p31.3	64108771	T|C	PGM1
rs2269241	RGL4	1.51e-05	Blood	Westra	trans	1p31.3	64108771	T|C	PGM1
rs2269240	PGM1	0.000371127	IFN	FairFax	cis	1p31.3	64109264	T|C	PGM1
rs2269240	PGM1	0.000680034	LPS2	FairFax	cis	1p31.3	64109264	T|C	PGM1
rs2269240	PGM1	0.00123866	Naive	FairFax	cis	1p31.3	64109264	T|C	PGM1
rs2476601	PTPN22	3.36e-10	Blood	Westra	cis	1p13.2	114377568	A|G	PTPN22
rs2476601	RPL22L1	8.68e-07	EBV-rest	Ram	trans	1p13.2	114377568	A|G	PTPN22
rs2476601	DNAJB9	2.28e-06	EBV-rest	Ram	trans	1p13.2	114377568	A|G	PTPN22
rs2476601	FKBP9	3.19e-06	EBV-rest	Ram	trans	1p13.2	114377568	A|G	PTPN22
rs2476601	HLA-H	3.21e-06	EBV-rest	Ram	trans	1p13.2	114377568	A|G	PTPN22
rs2476601	TTC5	4.46e-06	EBV-rest	Ram	trans	1p13.2	114377568	A|G	PTPN22
rs2476601	HLA-F	4.69e-06	EBV-rest	Ram	trans	1p13.2	114377568	A|G	PTPN22
rs2476601	TAP2	9.44e-06	EBV-rest	Ram	trans	1p13.2	114377568	A|G	PTPN22
rs2476601	CXCR7	1.54e-05	EBV-rest	Ram	trans	1p13.2	114377568	A|G	PTPN22
rs2476601	PRRG4	1.58e-05	EBV-rest	Ram	trans	1p13.2	114377568	A|G	PTPN22
rs2476601	EBPL	1.58e-06	PMA	Ram	trans	1p13.2	114377568	A|G	PTPN22
rs2476601	KDELR3	6.87e-06	PMA	Ram	trans	1p13.2	114377568	A|G	PTPN22
rs2476601	TP53INP1	1.78e-05	PMA	Ram	trans	1p13.2	114377568	A|G	PTPN22
rs2476601	DTD1	1.89e-05	PMA	Ram	trans	1p13.2	114377568	A|G	PTPN22
rs2476601	LOC402057	2.32e-05	PMA	Ram	trans	1p13.2	114377568	A|G	PTPN22
rs2476601	DNMT3B	2.4e-05	PMA	Ram	trans	1p13.2	114377568	A|G	PTPN22
rs2476601	LOC730074	3.28e-07	CD8	Ram	trans	1p13.2	114377568	A|G	PTPN22
rs2476601	RAB4B	1.96e-06	CD8	Ram	trans	1p13.2	114377568	A|G	PTPN22
rs2816316	RGS1	2.59e-14	Neutrophil	Peters	cis	1q31.2	192536813	C|A	Intergenic
rs2816316	RGS1	2.59e-14	Neutrophil	Peters	cis	1q31.2	192536813	C|A	Intergenic
rs2816316	RGS1	2.59e-14	Neutrophil	Peters	cis	1q31.2	192536813	C|A	Intergenic
rs2816316	RGS1	7.55e-13	bcell	FairFax (2012)	cis	1q31.2	192536813	C|A	Intergenic
rs2816316	RGS1	3.81e-12	Monocyte	Peters	cis	1q31.2	192536813	C|A	Intergenic
rs2816316	RGS1	3.81e-12	Monocyte	Peters	cis	1q31.2	192536813	C|A	Intergenic
rs2816316	RGS1	3.81e-12	Monocyte	Peters	cis	1q31.2	192536813	C|A	Intergenic
rs2816316	RGS1	3.81e-12	Monocyte	Peters	cis	1q31.2	192536813	C|A	Intergenic
rs2816316	RGS1	7.7e-12	Monocyte	Peters	cis	1q31.2	192536813	C|A	Intergenic
rs2816316	RGS1	7.7e-12	Monocyte	Peters	cis	1q31.2	192536813	C|A	Intergenic
rs2816316	RGS1	1.48e-11	IFN	FairFax	cis	1q31.2	192536813	C|A	Intergenic
rs2816316	RGS1	4.41e-11	LPS	Lee	cis	1q31.2	192536813	C|A	Intergenic
rs2816316	RGS1	9.81e-10	IFN	FairFax	cis	1q31.2	192536813	C|A	Intergenic
rs2816316	RGS1	4.43e-09	LPS24	FairFax	cis	1q31.2	192536813	C|A	Intergenic
rs2816316	RGS1	1.88e-08	Naive	FairFax	cis	1q31.2	192536813	C|A	Intergenic
rs2816316	RGS1	1.26e-07	mono	FairFax (2012)	cis	1q31.2	192536813	C|A	Intergenic
rs2816316	RGS1	5.83e-07	LPS24	FairFax	cis	1q31.2	192536813	C|A	Intergenic
rs2816316	RGS1	9.41e-07	FLU	Lee	cis	1q31.2	192536813	C|A	Intergenic
rs2816316	RGS1	0.00187621	Naive	FairFax	cis	1q31.2	192536813	C|A	Intergenic
rs2816316	TUBGCP2	4.74e-07	EBV-rest	Ram	trans	1q31.2	192536813	C|A	Intergenic
rs2816316	SCAND1	5.85e-06	EBV-rest	Ram	trans	1q31.2	192536813	C|A	Intergenic
rs2816316	BRD4	5.91e-06	EBV-rest	Ram	trans	1q31.2	192536813	C|A	Intergenic
rs2816316	LINCR	7.12e-06	EBV-rest	Ram	trans	1q31.2	192536813	C|A	Intergenic
rs2816316	TATDN2	9.63e-06	EBV-rest	Ram	trans	1q31.2	192536813	C|A	Intergenic
rs2816316	-	1.64e-05	EBV-rest	Ram	trans	1q31.2	192536813	C|A	Intergenic
rs2816316	FGR	2.06e-07	PMA	Ram	trans	1q31.2	192536813	C|A	Intergenic
rs2816316	FUT4	1.97e-06	PMA	Ram	trans	1q31.2	192536813	C|A	Intergenic
rs2816316	CCL4L1	3.23e-06	PMA	Ram	trans	1q31.2	192536813	C|A	Intergenic
rs2816316	SPTAN1	3.4e-06	PMA	Ram	trans	1q31.2	192536813	C|A	Intergenic
rs2816316	FGR	3.48e-06	PMA	Ram	trans	1q31.2	192536813	C|A	Intergenic
rs2816316	G3BP1	4.03e-06	PMA	Ram	trans	1q31.2	192536813	C|A	Intergenic
rs2816316	KIAA0556	6.97e-06	PMA	Ram	trans	1q31.2	192536813	C|A	Intergenic
rs2816316	C8orf33	9.43e-06	PMA	Ram	trans	1q31.2	192536813	C|A	Intergenic
rs2816316	DHRS9	1.1e-05	PMA	Ram	trans	1q31.2	192536813	C|A	Intergenic
rs2816316	PLAA	1.22e-05	PMA	Ram	trans	1q31.2	192536813	C|A	Intergenic
rs2816316	GMEB2	1.45e-05	PMA	Ram	trans	1q31.2	192536813	C|A	Intergenic
rs2816316	RRP12	1.63e-05	PMA	Ram	trans	1q31.2	192536813	C|A	Intergenic
rs2816316	WDR87	2.03e-05	PMA	Ram	trans	1q31.2	192536813	C|A	Intergenic
rs2816316	LOC100134774	2.21e-05	PMA	Ram	trans	1q31.2	192536813	C|A	Intergenic
rs2816316	PIWIL4	2.35e-05	PMA	Ram	trans	1q31.2	192536813	C|A	Intergenic
rs2816316	ZNF329	2.36e-05	PMA	Ram	trans	1q31.2	192536813	C|A	Intergenic
rs2816316	PDLIM2	6.1e-06	Blood	Westra	trans	1q31.2	192536813	C|A	Intergenic
rs6659127	CAMSAP1L1	0.000431872	Blood	Westra	cis	1q32.1	200803657	C|T	CAMSAP2
rs6659127	DDX59	1.97e-06	Blood	Westra	cis	1q32.1	200803657	C|T	CAMSAP2
rs6691977	ATP2A3	1.81e-06	CD4	Ram	trans	1q32.1	200814959	T|C	CAMSAP2
rs6691977	TRPC6	3.67e-06	CD8	Ram	trans	1q32.1	200814959	T|C	CAMSAP2
rs3024505	IL10	2.75e-05	IFN	FairFax	cis	1q32.1	206939904	G|A	IL10
rs3024505	IL10	2.99e-05	LPS2	FairFax	cis	1q32.1	206939904	G|A	IL10
rs3024505	IL10	0.0001614	LPS24	FairFax	cis	1q32.1	206939904	G|A	IL10
rs3024505	IL10	0.000358858	LPS2	FairFax	cis	1q32.1	206939904	G|A	IL10
rs3024505	IL10	0.000406886	IFN	FairFax	cis	1q32.1	206939904	G|A	IL10
rs3024505	IL10	0.00255302	LPS24	FairFax	cis	1q32.1	206939904	G|A	IL10
rs3024493	ZNF695	5.95e-07	EBV-rest	Ram	trans	1q32.1	206943968	C|A	IL10
rs3024493	ZNF37A	1.51e-06	EBV-rest	Ram	trans	1q32.1	206943968	C|A	IL10
rs3024493	LOC642361	2.24e-06	EBV-rest	Ram	trans	1q32.1	206943968	C|A	IL10
rs3024493	MYO1C	1.23e-05	EBV-rest	Ram	trans	1q32.1	206943968	C|A	IL10
rs3024493	LOC645262	1.34e-05	EBV-rest	Ram	trans	1q32.1	206943968	C|A	IL10
rs3024493	TSC22D3	1.5e-05	EBV-rest	Ram	trans	1q32.1	206943968	C|A	IL10
rs3024493	LOC644725	1.52e-05	EBV-rest	Ram	trans	1q32.1	206943968	C|A	IL10
rs3024493	ZNF695	5.83e-07	EBV-rest	Ram	trans	1q32.1	206943968	C|A	IL10
rs3024493	ZPBP2	6.6e-06	PMA	Ram	trans	1q32.1	206943968	C|A	IL10
rs3024493	DNM3	1.13e-05	PMA	Ram	trans	1q32.1	206943968	C|A	IL10
rs3024493	ATG9A	1.37e-05	PMA	Ram	trans	1q32.1	206943968	C|A	IL10
rs3024493	ABCG4	2.82e-06	CD8	Ram	trans	1q32.1	206943968	C|A	IL10
rs3024493	-	3.7e-06	Blood	Westra	trans	1q32.1	206943968	C|A	IL10
rs3024493	SLC30A5	6.68e-06	Blood	Westra	trans	1q32.1	206943968	C|A	IL10
rs1534422	ST6GAL1	2.72e-10	EBV-rest	Ram	trans	2p24.3	12640741	G|A	AC096559.1
rs1534422	TBC1D4	4.69e-06	EBV-rest	Ram	trans	2p24.3	12640741	G|A	AC096559.1
rs1534422	ST6GAL1	4.77e-06	EBV-rest	Ram	trans	2p24.3	12640741	G|A	AC096559.1
rs1534422	RASIP1	7.29e-06	EBV-rest	Ram	trans	2p24.3	12640741	G|A	AC096559.1
rs1534422	ITGB1BP1	7.58e-06	EBV-rest	Ram	trans	2p24.3	12640741	G|A	AC096559.1
rs1534422	LOC728275	9.64e-06	EBV-rest	Ram	trans	2p24.3	12640741	G|A	AC096559.1
rs1534422	ZNF462	1.03e-05	EBV-rest	Ram	trans	2p24.3	12640741	G|A	AC096559.1
rs1534422	HESX1	1.56e-05	EBV-rest	Ram	trans	2p24.3	12640741	G|A	AC096559.1
rs1534422	XRN2	1.77e-05	EBV-rest	Ram	trans	2p24.3	12640741	G|A	AC096559.1
rs1534422	PLAC1	9.83e-08	PMA	Ram	trans	2p24.3	12640741	G|A	AC096559.1
rs1534422	C1orf226	1.85e-07	PMA	Ram	trans	2p24.3	12640741	G|A	AC096559.1
rs1534422	RHOBTB2	4.01e-07	PMA	Ram	trans	2p24.3	12640741	G|A	AC096559.1
rs1534422	DDR2	4.47e-06	PMA	Ram	trans	2p24.3	12640741	G|A	AC096559.1
rs1534422	TBC1D4	4.54e-06	PMA	Ram	trans	2p24.3	12640741	G|A	AC096559.1
rs1534422	GPR81	8.88e-06	PMA	Ram	trans	2p24.3	12640741	G|A	AC096559.1
rs1534422	ITGB1BP1	9.02e-06	PMA	Ram	trans	2p24.3	12640741	G|A	AC096559.1
rs1534422	OLFM2	9.36e-06	PMA	Ram	trans	2p24.3	12640741	G|A	AC096559.1
rs1534422	FCRLB	1.68e-05	PMA	Ram	trans	2p24.3	12640741	G|A	AC096559.1
rs1534422	FGFRL1	1.81e-05	PMA	Ram	trans	2p24.3	12640741	G|A	AC096559.1
rs1534422	DNHL1	2.34e-05	PMA	Ram	trans	2p24.3	12640741	G|A	AC096559.1
rs1534422	AFARP1	2.51e-05	PMA	Ram	trans	2p24.3	12640741	G|A	AC096559.1
rs1534422	IL20RB	2.61e-07	CD4	Ram	trans	2p24.3	12640741	G|A	AC096559.1
rs1534422	SNTB2	7.31e-07	CD8	Ram	trans	2p24.3	12640741	G|A	AC096559.1
rs1534422	CCDC106	1.82e-06	CD8	Ram	trans	2p24.3	12640741	G|A	AC096559.1
rs1534422	CD69	3.2e-06	CD8	Ram	trans	2p24.3	12640741	G|A	AC096559.1
rs881429	TRIB2	0.00314294	Blood	Westra	cis	2p24.3	12648174	T|C	AC096559.1
rs2165738	ADCY3	6.19e-09	CD4	Ram	cis	2p23.3	24692809	C|G	Intergenic
rs2165738	ADCY3	3.7e-07	CD4	Ram	cis	2p23.3	24692809	C|G	Intergenic
rs2165738	ADCY3	1.18e-06	PMA	Ram	cis	2p23.3	24692809	C|G	Intergenic
rs2165738	ADCY3	2.79e-05	EBV-rest	Ram	cis	2p23.3	24692809	C|G	Intergenic
rs2165738	ADCY3	0.000157867	PMA	Ram	cis	2p23.3	24692809	C|G	Intergenic
rs2165738	NCOA1	0.000500439	PMA	Ram	cis	2p23.3	24692809	C|G	Intergenic
rs2165738	SF3B14	0.000359348	EBV-rest	Ram	cis	2p23.3	24692809	C|G	Intergenic
rs2165738	RORA	4.49e-07	EBV-rest	Ram	trans	2p23.3	24692809	C|G	Intergenic
rs2165738	ATM	6.2e-07	EBV-rest	Ram	trans	2p23.3	24692809	C|G	Intergenic
rs2165738	LITAF	1.55e-06	EBV-rest	Ram	trans	2p23.3	24692809	C|G	Intergenic
rs2165738	LPXN	2.69e-06	EBV-rest	Ram	trans	2p23.3	24692809	C|G	Intergenic
rs2165738	LSM6	6.05e-06	EBV-rest	Ram	trans	2p23.3	24692809	C|G	Intergenic
rs2165738	DDX17	8.49e-06	EBV-rest	Ram	trans	2p23.3	24692809	C|G	Intergenic
rs2165738	GRAMD1B	9.58e-06	EBV-rest	Ram	trans	2p23.3	24692809	C|G	Intergenic
rs2165738	PHF5A	1.22e-05	EBV-rest	Ram	trans	2p23.3	24692809	C|G	Intergenic
rs2165738	METTL3	1.41e-05	EBV-rest	Ram	trans	2p23.3	24692809	C|G	Intergenic
rs2165738	TNFRSF21	1.49e-05	EBV-rest	Ram	trans	2p23.3	24692809	C|G	Intergenic
rs2165738	SLC2A5	4.58e-07	PMA	Ram	trans	2p23.3	24692809	C|G	Intergenic
rs2165738	AASDH	4.63e-07	PMA	Ram	trans	2p23.3	24692809	C|G	Intergenic
rs2165738	CCDC106	6.17e-07	PMA	Ram	trans	2p23.3	24692809	C|G	Intergenic
rs2165738	GABPB2	6.3e-07	PMA	Ram	trans	2p23.3	24692809	C|G	Intergenic
rs2165738	TCF19	7.78e-07	PMA	Ram	trans	2p23.3	24692809	C|G	Intergenic
rs2165738	C21orf91	7.84e-07	PMA	Ram	trans	2p23.3	24692809	C|G	Intergenic
rs2165738	PVRIG	1.02e-06	PMA	Ram	trans	2p23.3	24692809	C|G	Intergenic
rs2165738	SLC37A4	3.69e-06	PMA	Ram	trans	2p23.3	24692809	C|G	Intergenic
rs2165738	LPXN	5.5e-06	PMA	Ram	trans	2p23.3	24692809	C|G	Intergenic
rs2165738	PRDM1	5.96e-06	PMA	Ram	trans	2p23.3	24692809	C|G	Intergenic
rs2165738	ALS2	7.97e-06	PMA	Ram	trans	2p23.3	24692809	C|G	Intergenic
rs2165738	DHX36	9.98e-06	PMA	Ram	trans	2p23.3	24692809	C|G	Intergenic
rs2165738	SIRT2	1.14e-05	PMA	Ram	trans	2p23.3	24692809	C|G	Intergenic
rs2165738	RBM33	1.16e-05	PMA	Ram	trans	2p23.3	24692809	C|G	Intergenic
rs2165738	VPS37B	1.31e-05	PMA	Ram	trans	2p23.3	24692809	C|G	Intergenic
rs2165738	LOC100129538	1.38e-05	PMA	Ram	trans	2p23.3	24692809	C|G	Intergenic
rs2165738	C17orf70	1.44e-05	PMA	Ram	trans	2p23.3	24692809	C|G	Intergenic
rs2165738	LOC653620	1.49e-05	PMA	Ram	trans	2p23.3	24692809	C|G	Intergenic
rs2165738	TBC1D24	1.68e-05	PMA	Ram	trans	2p23.3	24692809	C|G	Intergenic
rs2165738	SQSTM1	1.73e-05	PMA	Ram	trans	2p23.3	24692809	C|G	Intergenic
rs2165738	-	1.94e-05	PMA	Ram	trans	2p23.3	24692809	C|G	Intergenic
rs2165738	CTPS2	2.08e-05	PMA	Ram	trans	2p23.3	24692809	C|G	Intergenic
rs2165738	SNORD110	2.27e-05	PMA	Ram	trans	2p23.3	24692809	C|G	Intergenic
rs2165738	GRPR	2.55e-05	PMA	Ram	trans	2p23.3	24692809	C|G	Intergenic
rs2165738	SNRPD1	1.01e-05	Blood	Westra	trans	2p23.3	24692809	C|G	Intergenic
rs6709863	DUSP11	0.000101579	IFN	FairFax	cis	2p13.1	74746080	C|T	TLX2
rs6709863	HS.580515	0.000814658	IFN	FairFax	cis	2p13.1	74746080	C|T	TLX2
rs6709863	MOGS	7.43e-07	IFN	FairFax	cis	2p13.1	74746080	C|T	TLX2
rs6709863	MOGS	3.7e-05	IFN	FairFax	cis	2p13.1	74746080	C|T	TLX2
rs6709863	MOGS	0.00055865	LPS2	FairFax	cis	2p13.1	74746080	C|T	TLX2
rs6709863	MOGS	0.00273149	LPS24	FairFax	cis	2p13.1	74746080	C|T	TLX2
rs6709863	MOGS	0.00543083	LPS2	FairFax	cis	2p13.1	74746080	C|T	TLX2
rs6709863	MRPL53	1.11e-52	Naive	FairFax	cis	2p13.1	74746080	C|T	TLX2
rs6709863	MRPL53	6.09e-15	IFN	FairFax	cis	2p13.1	74746080	C|T	TLX2
rs6709863	MRPL53	2.99e-11	LPS24	FairFax	cis	2p13.1	74746080	C|T	TLX2
rs6709863	MRPL53	3.79e-10	bcell	FairFax (2012)	cis	2p13.1	74746080	C|T	TLX2
rs6709863	MRPL53	2.79e-09	LPS2	FairFax	cis	2p13.1	74746080	C|T	TLX2
rs6709863	MRPL53	2.12e-05	mono	FairFax (2012)	cis	2p13.1	74746080	C|T	TLX2
rs6709863	PCGF1	2.54e-06	IFN	FairFax	cis	2p13.1	74746080	C|T	TLX2
rs6709863	WBP1	0.000294441	Naive	FairFax	cis	2p13.1	74746080	C|T	TLX2
rs6709863	WBP1	0.000920471	LPS24	FairFax	cis	2p13.1	74746080	C|T	TLX2
rs6709863	WBP1	0.00374332	LPS2	FairFax	cis	2p13.1	74746080	C|T	TLX2
rs6546909	MRPL53	5.01e-161	Blood	Westra	cis	2p13.1	74746322	A|T	TLX2
rs9653442	AFF3	0.000831306	Monocyte	Peters	cis	2q11.2	100825367	C|T	LINC01104
rs9653442	AFF3	0.000831306	Monocyte	Peters	cis	2q11.2	100825367	C|T	LINC01104
rs9653442	AFF3	0.000831306	Monocyte	Peters	cis	2q11.2	100825367	C|T	LINC01104
rs9653442	CHST10	2.74e-05	PMA	Ram	cis	2q11.2	100825367	C|T	LINC01104
rs9653442	ATM	1.37e-06	EBV-rest	Ram	trans	2q11.2	100825367	C|T	LINC01104
rs9653442	LOC283340	4.42e-06	EBV-rest	Ram	trans	2q11.2	100825367	C|T	LINC01104
rs9653442	PHF16	9.01e-06	EBV-rest	Ram	trans	2q11.2	100825367	C|T	LINC01104
rs9653442	DONSON	1.15e-05	EBV-rest	Ram	trans	2q11.2	100825367	C|T	LINC01104
rs9653442	SCAPER	8.46e-08	PMA	Ram	trans	2q11.2	100825367	C|T	LINC01104
rs9653442	HDHD2	2.55e-06	PMA	Ram	trans	2q11.2	100825367	C|T	LINC01104
rs9653442	RNF160	1.26e-05	PMA	Ram	trans	2q11.2	100825367	C|T	LINC01104
rs9653442	OSCAR	1.5e-05	PMA	Ram	trans	2q11.2	100825367	C|T	LINC01104
rs9653442	N6AMT1	2.49e-05	PMA	Ram	trans	2q11.2	100825367	C|T	LINC01104
rs9653442	TMED4	1.42e-06	CD4	Ram	trans	2q11.2	100825367	C|T	LINC01104
rs6543134	IL18R1	8.86e-32	Blood	Westra	cis	2q12.1	103050458	T|G	IL18RAP
rs6543134	IL18R1	2.42e-09	PMA	Ram	cis	2q12.1	103050458	T|G	IL18RAP
rs6543134	IL18R1	1.91e-06	PMA	Ram	cis	2q12.1	103050458	T|G	IL18RAP
rs6543134	IL18R1	2.38e-06	EBV-rest	Ram	cis	2q12.1	103050458	T|G	IL18RAP
rs6543134	IL18R1	0.00202324	Blood	Westra	cis	2q12.1	103050458	T|G	IL18RAP
rs6543134	IL18RAP	9.81e-198	Blood	Westra	cis	2q12.1	103050458	T|G	IL18RAP
rs6543134	IL18RAP	1.41e-05	CD8	Ram	cis	2q12.1	103050458	T|G	IL18RAP
rs6543134	FANCE	1.59e-08	EBV-rest	Ram	trans	2q12.1	103050458	T|G	IL18RAP
rs6543134	SULF2	1.06e-06	EBV-rest	Ram	trans	2q12.1	103050458	T|G	IL18RAP
rs6543134	MACF1	1.47e-06	EBV-rest	Ram	trans	2q12.1	103050458	T|G	IL18RAP
rs6543134	ATG10	2.73e-06	EBV-rest	Ram	trans	2q12.1	103050458	T|G	IL18RAP
rs6543134	UNG	3.87e-06	EBV-rest	Ram	trans	2q12.1	103050458	T|G	IL18RAP
rs6543134	PTTG1IP	6.69e-06	EBV-rest	Ram	trans	2q12.1	103050458	T|G	IL18RAP
rs6543134	CD82	1.08e-05	EBV-rest	Ram	trans	2q12.1	103050458	T|G	IL18RAP
rs6543134	PREB	1.37e-05	EBV-rest	Ram	trans	2q12.1	103050458	T|G	IL18RAP
rs6543134	MGAT4B	1.59e-05	EBV-rest	Ram	trans	2q12.1	103050458	T|G	IL18RAP
rs6543134	MAPK13	6.72e-08	PMA	Ram	trans	2q12.1	103050458	T|G	IL18RAP
rs6543134	FXR2	1.9e-07	PMA	Ram	trans	2q12.1	103050458	T|G	IL18RAP
rs6543134	LOC728532	2.41e-07	PMA	Ram	trans	2q12.1	103050458	T|G	IL18RAP
rs6543134	PRRT3	3.03e-07	PMA	Ram	trans	2q12.1	103050458	T|G	IL18RAP
rs6543134	ADK	3.05e-07	PMA	Ram	trans	2q12.1	103050458	T|G	IL18RAP
rs6543134	TNFRSF8	5.3e-07	PMA	Ram	trans	2q12.1	103050458	T|G	IL18RAP
rs6543134	DOK4	1.07e-06	PMA	Ram	trans	2q12.1	103050458	T|G	IL18RAP
rs6543134	DEDD	1.45e-06	PMA	Ram	trans	2q12.1	103050458	T|G	IL18RAP
rs6543134	EPR1	1.53e-06	PMA	Ram	trans	2q12.1	103050458	T|G	IL18RAP
rs6543134	LOC652968	2.31e-06	PMA	Ram	trans	2q12.1	103050458	T|G	IL18RAP
rs6543134	PIK3CD	3.57e-06	PMA	Ram	trans	2q12.1	103050458	T|G	IL18RAP
rs6543134	P2RX5	3.75e-06	PMA	Ram	trans	2q12.1	103050458	T|G	IL18RAP
rs6543134	ROBLD3	3.75e-06	PMA	Ram	trans	2q12.1	103050458	T|G	IL18RAP
rs6543134	ADK	3.78e-06	PMA	Ram	trans	2q12.1	103050458	T|G	IL18RAP
rs6543134	CECR5	4.27e-06	PMA	Ram	trans	2q12.1	103050458	T|G	IL18RAP
rs6543134	IL12A	4.63e-06	PMA	Ram	trans	2q12.1	103050458	T|G	IL18RAP
rs6543134	TXNRD1	5.03e-06	PMA	Ram	trans	2q12.1	103050458	T|G	IL18RAP
rs6543134	MAPBPIP	5.46e-06	PMA	Ram	trans	2q12.1	103050458	T|G	IL18RAP
rs6543134	NBPF8	5.52e-06	PMA	Ram	trans	2q12.1	103050458	T|G	IL18RAP
rs6543134	LRIG1	5.88e-06	PMA	Ram	trans	2q12.1	103050458	T|G	IL18RAP
rs6543134	PRKCDBP	6.1e-06	PMA	Ram	trans	2q12.1	103050458	T|G	IL18RAP
rs6543134	KIDINS220	6.95e-06	PMA	Ram	trans	2q12.1	103050458	T|G	IL18RAP
rs6543134	NBPF10	8.44e-06	PMA	Ram	trans	2q12.1	103050458	T|G	IL18RAP
rs6543134	ZNF326	9.43e-06	PMA	Ram	trans	2q12.1	103050458	T|G	IL18RAP
rs6543134	DENND3	9.63e-06	PMA	Ram	trans	2q12.1	103050458	T|G	IL18RAP
rs6543134	EBI2	1.04e-05	PMA	Ram	trans	2q12.1	103050458	T|G	IL18RAP
rs6543134	RRBP1	1.22e-05	PMA	Ram	trans	2q12.1	103050458	T|G	IL18RAP
rs6543134	KRT17	1.27e-05	PMA	Ram	trans	2q12.1	103050458	T|G	IL18RAP
rs6543134	LRIG1	1.35e-05	PMA	Ram	trans	2q12.1	103050458	T|G	IL18RAP
rs6543134	RIMS1	1.5e-05	PMA	Ram	trans	2q12.1	103050458	T|G	IL18RAP
rs6543134	ABCG1	1.9e-05	PMA	Ram	trans	2q12.1	103050458	T|G	IL18RAP
rs6543134	SEMA7A	1.95e-05	PMA	Ram	trans	2q12.1	103050458	T|G	IL18RAP
rs6543134	LOC136143	1.99e-05	PMA	Ram	trans	2q12.1	103050458	T|G	IL18RAP
rs6543134	NBPF20	1.99e-05	PMA	Ram	trans	2q12.1	103050458	T|G	IL18RAP
rs6543134	C9orf64	2.19e-05	PMA	Ram	trans	2q12.1	103050458	T|G	IL18RAP
rs6543134	ACER2	2.29e-05	PMA	Ram	trans	2q12.1	103050458	T|G	IL18RAP
rs6543134	NQO2	2.45e-05	PMA	Ram	trans	2q12.1	103050458	T|G	IL18RAP
rs6543134	ANTXR2	2.45e-05	PMA	Ram	trans	2q12.1	103050458	T|G	IL18RAP
rs6543134	SLC36A1	2.7e-05	PMA	Ram	trans	2q12.1	103050458	T|G	IL18RAP
rs6543134	LOC728532	2.15e-08	PMA	Ram	trans	2q12.1	103050458	T|G	IL18RAP
rs6543134	BCL2	3.25e-07	CD4	Ram	trans	2q12.1	103050458	T|G	IL18RAP
rs6543134	ADD3	7.64e-07	CD4	Ram	trans	2q12.1	103050458	T|G	IL18RAP
rs2110735	IL18R1	5.22e-37	LPS2	FairFax	cis	2q12.1	103050925	A|G	IL18RAP
rs2110735	IL18R1	0.000146241	CD4	Peters	cis	2q12.1	103050925	A|G	IL18RAP
rs2110735	IL18R1	0.000146241	CD4	Peters	cis	2q12.1	103050925	A|G	IL18RAP
rs2110735	IL18R1	0.000146241	CD4	Peters	cis	2q12.1	103050925	A|G	IL18RAP
rs2110735	IL18R1	0.000146241	CD4	Peters	cis	2q12.1	103050925	A|G	IL18RAP
rs2110735	IL18R1	0.000146241	CD4	Peters	cis	2q12.1	103050925	A|G	IL18RAP
rs2110735	IL18RAP	6.41e-24	LPS2	FairFax	cis	2q12.1	103050925	A|G	IL18RAP
rs2110735	IL18RAP	1.62e-13	Neutrophil	Peters	cis	2q12.1	103050925	A|G	IL18RAP
rs2110735	IL18RAP	1.62e-13	Neutrophil	Peters	cis	2q12.1	103050925	A|G	IL18RAP
rs2110735	IL18RAP	1.62e-13	Neutrophil	Peters	cis	2q12.1	103050925	A|G	IL18RAP
rs2110735	IL18RAP	1.62e-13	Neutrophil	Peters	cis	2q12.1	103050925	A|G	IL18RAP
rs2110735	IL18RAP	1.62e-13	Neutrophil	Peters	cis	2q12.1	103050925	A|G	IL18RAP
rs2110735	IL18RAP	0.000306768	Naive	FairFax	cis	2q12.1	103050925	A|G	IL18RAP
rs2058660	CYP2C19	1.55e-13	Blood	Westra	trans	2q12.1	103054449	G|A	IL18RAP
rs2058660	ZNF32	1.31e-08	Blood	Westra	trans	2q12.1	103054449	G|A	IL18RAP
rs2058660	-	2.31e-06	Blood	Westra	trans	2q12.1	103054449	G|A	IL18RAP
rs1990760	IFIH1	1.81e-05	IFN	FairFax	cis	2q24.2	163124051	C|T	IFIH1
rs1990760	IFIH1	0.00632734	LPS2	FairFax	cis	2q24.2	163124051	C|T	IFIH1
rs1990760	LOC643997	8.56e-09	EBV-rest	Ram	trans	2q24.2	163124051	C|T	IFIH1
rs1990760	OMA1	3.64e-07	EBV-rest	Ram	trans	2q24.2	163124051	C|T	IFIH1
rs1990760	C9orf23	6.49e-07	EBV-rest	Ram	trans	2q24.2	163124051	C|T	IFIH1
rs1990760	LCMT1	1.19e-06	EBV-rest	Ram	trans	2q24.2	163124051	C|T	IFIH1
rs1990760	KIF3B	1.19e-06	EBV-rest	Ram	trans	2q24.2	163124051	C|T	IFIH1
rs1990760	LOC100130154	1.36e-06	EBV-rest	Ram	trans	2q24.2	163124051	C|T	IFIH1
rs1990760	LOC392285	1.6e-06	EBV-rest	Ram	trans	2q24.2	163124051	C|T	IFIH1
rs1990760	LOC341315	2.42e-06	EBV-rest	Ram	trans	2q24.2	163124051	C|T	IFIH1
rs1990760	NANS	2.46e-06	EBV-rest	Ram	trans	2q24.2	163124051	C|T	IFIH1
rs1990760	BTG3	3.23e-06	EBV-rest	Ram	trans	2q24.2	163124051	C|T	IFIH1
rs1990760	CKS2	3.27e-06	EBV-rest	Ram	trans	2q24.2	163124051	C|T	IFIH1
rs1990760	CD164	3.98e-06	EBV-rest	Ram	trans	2q24.2	163124051	C|T	IFIH1
rs1990760	LOC645466	4.57e-06	EBV-rest	Ram	trans	2q24.2	163124051	C|T	IFIH1
rs1990760	ACSL1	4.58e-06	EBV-rest	Ram	trans	2q24.2	163124051	C|T	IFIH1
rs1990760	LOC100132499	5.22e-06	EBV-rest	Ram	trans	2q24.2	163124051	C|T	IFIH1
rs1990760	RPS28	5.36e-06	EBV-rest	Ram	trans	2q24.2	163124051	C|T	IFIH1
rs1990760	CAST	5.67e-06	EBV-rest	Ram	trans	2q24.2	163124051	C|T	IFIH1
rs1990760	TOP1P2	8.09e-06	EBV-rest	Ram	trans	2q24.2	163124051	C|T	IFIH1
rs1990760	DEDD	8.1e-06	EBV-rest	Ram	trans	2q24.2	163124051	C|T	IFIH1
rs1990760	LOC728026	9.44e-06	EBV-rest	Ram	trans	2q24.2	163124051	C|T	IFIH1
rs1990760	ANP32C	9.46e-06	EBV-rest	Ram	trans	2q24.2	163124051	C|T	IFIH1
rs1990760	LOC646821	9.47e-06	EBV-rest	Ram	trans	2q24.2	163124051	C|T	IFIH1
rs1990760	FLYWCH2	1.03e-05	EBV-rest	Ram	trans	2q24.2	163124051	C|T	IFIH1
rs1990760	GLRX5	1.06e-05	EBV-rest	Ram	trans	2q24.2	163124051	C|T	IFIH1
rs1990760	LOC649946	1.11e-05	EBV-rest	Ram	trans	2q24.2	163124051	C|T	IFIH1
rs1990760	LOC642453	1.13e-05	EBV-rest	Ram	trans	2q24.2	163124051	C|T	IFIH1
rs1990760	NUP50	1.33e-05	EBV-rest	Ram	trans	2q24.2	163124051	C|T	IFIH1
rs1990760	ACTR3	1.47e-05	EBV-rest	Ram	trans	2q24.2	163124051	C|T	IFIH1
rs1990760	ANXA2P1	1.62e-05	EBV-rest	Ram	trans	2q24.2	163124051	C|T	IFIH1
rs1990760	TREML2	1.75e-05	EBV-rest	Ram	trans	2q24.2	163124051	C|T	IFIH1
rs1990760	JUND	1.05e-07	PMA	Ram	trans	2q24.2	163124051	C|T	IFIH1
rs1990760	LOC649946	1.62e-07	PMA	Ram	trans	2q24.2	163124051	C|T	IFIH1
rs1990760	LOC392285	3.44e-07	PMA	Ram	trans	2q24.2	163124051	C|T	IFIH1
rs1990760	LOC643997	3.91e-07	PMA	Ram	trans	2q24.2	163124051	C|T	IFIH1
rs1990760	REL	4.43e-07	PMA	Ram	trans	2q24.2	163124051	C|T	IFIH1
rs1990760	OMA1	7.04e-07	PMA	Ram	trans	2q24.2	163124051	C|T	IFIH1
rs1990760	DCUN1D5	2.3e-06	PMA	Ram	trans	2q24.2	163124051	C|T	IFIH1
rs1990760	DHX30	3.76e-06	PMA	Ram	trans	2q24.2	163124051	C|T	IFIH1
rs1990760	LOC442232	4.07e-06	PMA	Ram	trans	2q24.2	163124051	C|T	IFIH1
rs1990760	LOC728973	8.19e-06	PMA	Ram	trans	2q24.2	163124051	C|T	IFIH1
rs1990760	CD164	8.23e-06	PMA	Ram	trans	2q24.2	163124051	C|T	IFIH1
rs1990760	-	9.28e-06	PMA	Ram	trans	2q24.2	163124051	C|T	IFIH1
rs1990760	IRF1	1.42e-05	PMA	Ram	trans	2q24.2	163124051	C|T	IFIH1
rs1990760	MAD2L1	1.55e-05	PMA	Ram	trans	2q24.2	163124051	C|T	IFIH1
rs1990760	PSMB3	1.58e-05	PMA	Ram	trans	2q24.2	163124051	C|T	IFIH1
rs1990760	FBXO5	1.69e-05	PMA	Ram	trans	2q24.2	163124051	C|T	IFIH1
rs1990760	EPB41L2	1.77e-05	PMA	Ram	trans	2q24.2	163124051	C|T	IFIH1
rs1990760	LOC100134504	1.95e-05	PMA	Ram	trans	2q24.2	163124051	C|T	IFIH1
rs1990760	DOLK	2.04e-05	PMA	Ram	trans	2q24.2	163124051	C|T	IFIH1
rs1990760	TUBA4A	2.19e-05	PMA	Ram	trans	2q24.2	163124051	C|T	IFIH1
rs1990760	ST6GAL1	1.43e-06	CD8	Ram	trans	2q24.2	163124051	C|T	IFIH1
rs1990760	FGFRL1	2.32e-08	Blood	Westra	trans	2q24.2	163124051	C|T	IFIH1
rs3747517	IFIH1	8.77e-10	FLU	Lee	cis	2q24.2	163128824	T|C	IFIH1
rs3747517	UFM1	3.88e-08	EBV-rest	Ram	trans	2q24.2	163128824	T|C	IFIH1
rs3747517	TTC19	7.27e-07	EBV-rest	Ram	trans	2q24.2	163128824	T|C	IFIH1
rs3747517	ANXA2P1	1.92e-06	EBV-rest	Ram	trans	2q24.2	163128824	T|C	IFIH1
rs3747517	NOL10	6.94e-06	EBV-rest	Ram	trans	2q24.2	163128824	T|C	IFIH1
rs3747517	OMA1	7.68e-06	EBV-rest	Ram	trans	2q24.2	163128824	T|C	IFIH1
rs3747517	NANS	1.14e-05	EBV-rest	Ram	trans	2q24.2	163128824	T|C	IFIH1
rs3747517	NXT1	1.14e-05	EBV-rest	Ram	trans	2q24.2	163128824	T|C	IFIH1
rs3747517	SLC35B2	1.16e-05	EBV-rest	Ram	trans	2q24.2	163128824	T|C	IFIH1
rs3747517	ATP6AP1L	1.23e-05	EBV-rest	Ram	trans	2q24.2	163128824	T|C	IFIH1
rs3747517	LOC653344	1.38e-05	EBV-rest	Ram	trans	2q24.2	163128824	T|C	IFIH1
rs3747517	-	1.39e-05	EBV-rest	Ram	trans	2q24.2	163128824	T|C	IFIH1
rs3747517	C12orf32	1.43e-05	EBV-rest	Ram	trans	2q24.2	163128824	T|C	IFIH1
rs3747517	UTP15	1.43e-05	EBV-rest	Ram	trans	2q24.2	163128824	T|C	IFIH1
rs3747517	CTNNA1	1.45e-05	EBV-rest	Ram	trans	2q24.2	163128824	T|C	IFIH1
rs3747517	C6orf66	1.63e-05	EBV-rest	Ram	trans	2q24.2	163128824	T|C	IFIH1
rs3747517	LOC649946	2.97e-07	PMA	Ram	trans	2q24.2	163128824	T|C	IFIH1
rs3747517	SFRS3	1.66e-06	PMA	Ram	trans	2q24.2	163128824	T|C	IFIH1
rs3747517	KLF5	2.02e-06	PMA	Ram	trans	2q24.2	163128824	T|C	IFIH1
rs3747517	UFM1	2.59e-06	PMA	Ram	trans	2q24.2	163128824	T|C	IFIH1
rs3747517	JUND	3.67e-06	PMA	Ram	trans	2q24.2	163128824	T|C	IFIH1
rs3747517	C11orf73	4.55e-06	PMA	Ram	trans	2q24.2	163128824	T|C	IFIH1
rs3747517	SGCB	8.64e-06	PMA	Ram	trans	2q24.2	163128824	T|C	IFIH1
rs3747517	ZNF84	9.59e-06	PMA	Ram	trans	2q24.2	163128824	T|C	IFIH1
rs3747517	LOC100134504	1.08e-05	PMA	Ram	trans	2q24.2	163128824	T|C	IFIH1
rs3747517	SCYL1BP1	1.2e-05	PMA	Ram	trans	2q24.2	163128824	T|C	IFIH1
rs3747517	NAT13	1.28e-05	PMA	Ram	trans	2q24.2	163128824	T|C	IFIH1
rs3747517	ARPC1B	1.29e-05	PMA	Ram	trans	2q24.2	163128824	T|C	IFIH1
rs3747517	SUMF2	1.75e-05	PMA	Ram	trans	2q24.2	163128824	T|C	IFIH1
rs3747517	CNOT6	1.85e-05	PMA	Ram	trans	2q24.2	163128824	T|C	IFIH1
rs3747517	OMA1	2.37e-05	PMA	Ram	trans	2q24.2	163128824	T|C	IFIH1
rs3747517	SHROOM3	2.49e-05	PMA	Ram	trans	2q24.2	163128824	T|C	IFIH1
rs3747517	DCUN1D5	2.61e-05	PMA	Ram	trans	2q24.2	163128824	T|C	IFIH1
rs11571291	CTLA4	0.000712936	IFN	FairFax	cis	2q33.2	204721132	T|C	Intergenic
rs11571291	TBX15	3.39e-06	EBV-rest	Ram	trans	2q33.2	204721132	T|C	Intergenic
rs11571291	KCNN4	7.44e-06	EBV-rest	Ram	trans	2q33.2	204721132	T|C	Intergenic
rs11571291	LRMP	7.96e-06	EBV-rest	Ram	trans	2q33.2	204721132	T|C	Intergenic
rs11571291	TGFB1I1	9.36e-06	EBV-rest	Ram	trans	2q33.2	204721132	T|C	Intergenic
rs11571291	STARD5	1.15e-05	EBV-rest	Ram	trans	2q33.2	204721132	T|C	Intergenic
rs11571291	DGCR5	1.43e-05	EBV-rest	Ram	trans	2q33.2	204721132	T|C	Intergenic
rs11571291	BAG3	1.48e-05	EBV-rest	Ram	trans	2q33.2	204721132	T|C	Intergenic
rs11571291	CNPY2	1.63e-05	EBV-rest	Ram	trans	2q33.2	204721132	T|C	Intergenic
rs11571291	TMUB2	6.08e-09	PMA	Ram	trans	2q33.2	204721132	T|C	Intergenic
rs11571291	LOC729148	7.04e-08	PMA	Ram	trans	2q33.2	204721132	T|C	Intergenic
rs11571291	ZNF549	3.02e-07	PMA	Ram	trans	2q33.2	204721132	T|C	Intergenic
rs11571291	TDP1	3.93e-07	PMA	Ram	trans	2q33.2	204721132	T|C	Intergenic
rs11571291	RYK	6.49e-07	PMA	Ram	trans	2q33.2	204721132	T|C	Intergenic
rs11571291	TJAP1	6.7e-07	PMA	Ram	trans	2q33.2	204721132	T|C	Intergenic
rs11571291	CCDC86	6.8e-07	PMA	Ram	trans	2q33.2	204721132	T|C	Intergenic
rs11571291	ST6GALNAC4	7.36e-07	PMA	Ram	trans	2q33.2	204721132	T|C	Intergenic
rs11571291	MTDH	8.15e-07	PMA	Ram	trans	2q33.2	204721132	T|C	Intergenic
rs11571291	BSG	1.09e-06	PMA	Ram	trans	2q33.2	204721132	T|C	Intergenic
rs11571291	TGFB1I1	1.14e-06	PMA	Ram	trans	2q33.2	204721132	T|C	Intergenic
rs11571291	CHL1	1.17e-06	PMA	Ram	trans	2q33.2	204721132	T|C	Intergenic
rs11571291	JOSD1	1.27e-06	PMA	Ram	trans	2q33.2	204721132	T|C	Intergenic
rs11571291	ACTN1	1.53e-06	PMA	Ram	trans	2q33.2	204721132	T|C	Intergenic
rs11571291	CTNNA1	1.85e-06	PMA	Ram	trans	2q33.2	204721132	T|C	Intergenic
rs11571291	PLAC1	2.08e-06	PMA	Ram	trans	2q33.2	204721132	T|C	Intergenic
rs11571291	SENP6	2.2e-06	PMA	Ram	trans	2q33.2	204721132	T|C	Intergenic
rs11571291	SF3A1	2.65e-06	PMA	Ram	trans	2q33.2	204721132	T|C	Intergenic
rs11571291	SRD5A3	2.76e-06	PMA	Ram	trans	2q33.2	204721132	T|C	Intergenic
rs11571291	CIAPIN1	3.01e-06	PMA	Ram	trans	2q33.2	204721132	T|C	Intergenic
rs11571291	RNF19B	3.42e-06	PMA	Ram	trans	2q33.2	204721132	T|C	Intergenic
rs11571291	CDKN1A	3.83e-06	PMA	Ram	trans	2q33.2	204721132	T|C	Intergenic
rs11571291	ZNF69	4.29e-06	PMA	Ram	trans	2q33.2	204721132	T|C	Intergenic
rs11571291	CPSF1	4.53e-06	PMA	Ram	trans	2q33.2	204721132	T|C	Intergenic
rs11571291	C16orf48	4.94e-06	PMA	Ram	trans	2q33.2	204721132	T|C	Intergenic
rs11571291	BCL2	5.63e-06	PMA	Ram	trans	2q33.2	204721132	T|C	Intergenic
rs11571291	PPP1R16A	5.85e-06	PMA	Ram	trans	2q33.2	204721132	T|C	Intergenic
rs11571291	ZBED2	6.57e-06	PMA	Ram	trans	2q33.2	204721132	T|C	Intergenic
rs11571291	TNFRSF14	6.63e-06	PMA	Ram	trans	2q33.2	204721132	T|C	Intergenic
rs11571291	AUH	7.75e-06	PMA	Ram	trans	2q33.2	204721132	T|C	Intergenic
rs11571291	LOC100128288	7.86e-06	PMA	Ram	trans	2q33.2	204721132	T|C	Intergenic
rs11571291	BTBD12	9.23e-06	PMA	Ram	trans	2q33.2	204721132	T|C	Intergenic
rs11571291	MOBKL2A	9.6e-06	PMA	Ram	trans	2q33.2	204721132	T|C	Intergenic
rs11571291	UPP1	1.03e-05	PMA	Ram	trans	2q33.2	204721132	T|C	Intergenic
rs11571291	FAM65A	1.19e-05	PMA	Ram	trans	2q33.2	204721132	T|C	Intergenic
rs11571291	NIPSNAP1	1.22e-05	PMA	Ram	trans	2q33.2	204721132	T|C	Intergenic
rs11571291	RBPMS2	1.31e-05	PMA	Ram	trans	2q33.2	204721132	T|C	Intergenic
rs11571291	BRMS1L	1.45e-05	PMA	Ram	trans	2q33.2	204721132	T|C	Intergenic
rs11571291	SFRS14	1.55e-05	PMA	Ram	trans	2q33.2	204721132	T|C	Intergenic
rs11571291	NRXN2	1.68e-05	PMA	Ram	trans	2q33.2	204721132	T|C	Intergenic
rs11571291	RAD51C	1.69e-05	PMA	Ram	trans	2q33.2	204721132	T|C	Intergenic
rs11571291	TBX15	1.88e-05	PMA	Ram	trans	2q33.2	204721132	T|C	Intergenic
rs11571291	SPATA13	1.91e-05	PMA	Ram	trans	2q33.2	204721132	T|C	Intergenic
rs11571291	TCF15	1.92e-05	PMA	Ram	trans	2q33.2	204721132	T|C	Intergenic
rs11571291	IFNAR2	2.05e-05	PMA	Ram	trans	2q33.2	204721132	T|C	Intergenic
rs11571291	C11orf67	2.1e-05	PMA	Ram	trans	2q33.2	204721132	T|C	Intergenic
rs11571291	FAM119A	2.38e-05	PMA	Ram	trans	2q33.2	204721132	T|C	Intergenic
rs11571291	FAM134A	2.55e-05	PMA	Ram	trans	2q33.2	204721132	T|C	Intergenic
rs11571291	CRIM1	2.57e-05	PMA	Ram	trans	2q33.2	204721132	T|C	Intergenic
rs11571291	AES	2.58e-05	PMA	Ram	trans	2q33.2	204721132	T|C	Intergenic
rs11571291	ALG13	1.85e-06	CD8	Ram	trans	2q33.2	204721132	T|C	Intergenic
rs1024161	SYCP1	2.64e-08	Blood	Westra	trans	2q33.2	204721752	T|C	Intergenic
rs11571315	CD28	0.00350031	Blood	Westra	cis	2q33.2	204730901	T|C	CTLA4
rs3087243	CTLA4	0.000188458	IFN	FairFax	cis	2q33.2	204738919	G|A	CTLA4
rs3087243	TARBP1	1.06e-06	EBV-rest	Ram	trans	2q33.2	204738919	G|A	CTLA4
rs3087243	IL10RB	1.44e-06	EBV-rest	Ram	trans	2q33.2	204738919	G|A	CTLA4
rs3087243	SEC61B	2.7e-06	EBV-rest	Ram	trans	2q33.2	204738919	G|A	CTLA4
rs3087243	LRMP	4.56e-06	EBV-rest	Ram	trans	2q33.2	204738919	G|A	CTLA4
rs3087243	HMOX1	5.73e-06	EBV-rest	Ram	trans	2q33.2	204738919	G|A	CTLA4
rs3087243	TBX15	6.13e-06	EBV-rest	Ram	trans	2q33.2	204738919	G|A	CTLA4
rs3087243	SLC35A1	6.44e-06	EBV-rest	Ram	trans	2q33.2	204738919	G|A	CTLA4
rs3087243	PSRC1	6.83e-06	EBV-rest	Ram	trans	2q33.2	204738919	G|A	CTLA4
rs3087243	KCNN4	1.12e-05	EBV-rest	Ram	trans	2q33.2	204738919	G|A	CTLA4
rs3087243	TRIM9	1.14e-05	EBV-rest	Ram	trans	2q33.2	204738919	G|A	CTLA4
rs3087243	LOC643031	1.3e-05	EBV-rest	Ram	trans	2q33.2	204738919	G|A	CTLA4
rs3087243	CCNYL1	1.32e-05	EBV-rest	Ram	trans	2q33.2	204738919	G|A	CTLA4
rs3087243	ZNF493	1.46e-05	EBV-rest	Ram	trans	2q33.2	204738919	G|A	CTLA4
rs3087243	C21orf94	1.7e-05	EBV-rest	Ram	trans	2q33.2	204738919	G|A	CTLA4
rs3087243	TMUB2	1.87e-08	PMA	Ram	trans	2q33.2	204738919	G|A	CTLA4
rs3087243	LOC729148	1.48e-07	PMA	Ram	trans	2q33.2	204738919	G|A	CTLA4
rs3087243	ZNF549	2.83e-07	PMA	Ram	trans	2q33.2	204738919	G|A	CTLA4
rs3087243	TDP1	3.37e-07	PMA	Ram	trans	2q33.2	204738919	G|A	CTLA4
rs3087243	SENP6	4.7e-07	PMA	Ram	trans	2q33.2	204738919	G|A	CTLA4
rs3087243	GOT2	2.25e-06	PMA	Ram	trans	2q33.2	204738919	G|A	CTLA4
rs3087243	SRD5A3	2.37e-06	PMA	Ram	trans	2q33.2	204738919	G|A	CTLA4
rs3087243	RYK	3.46e-06	PMA	Ram	trans	2q33.2	204738919	G|A	CTLA4
rs3087243	GM2A	3.58e-06	PMA	Ram	trans	2q33.2	204738919	G|A	CTLA4
rs3087243	CCDC86	3.84e-06	PMA	Ram	trans	2q33.2	204738919	G|A	CTLA4
rs3087243	BSG	3.94e-06	PMA	Ram	trans	2q33.2	204738919	G|A	CTLA4
rs3087243	TJAP1	4.06e-06	PMA	Ram	trans	2q33.2	204738919	G|A	CTLA4
rs3087243	SPATA13	4.98e-06	PMA	Ram	trans	2q33.2	204738919	G|A	CTLA4
rs3087243	CIAPIN1	4.99e-06	PMA	Ram	trans	2q33.2	204738919	G|A	CTLA4
rs3087243	DIXDC1	5.47e-06	PMA	Ram	trans	2q33.2	204738919	G|A	CTLA4
rs3087243	TARBP2	5.81e-06	PMA	Ram	trans	2q33.2	204738919	G|A	CTLA4
rs3087243	SFRS14	6.25e-06	PMA	Ram	trans	2q33.2	204738919	G|A	CTLA4
rs3087243	AUH	6.52e-06	PMA	Ram	trans	2q33.2	204738919	G|A	CTLA4
rs3087243	LOC653453	6.92e-06	PMA	Ram	trans	2q33.2	204738919	G|A	CTLA4
rs3087243	C11orf67	6.97e-06	PMA	Ram	trans	2q33.2	204738919	G|A	CTLA4
rs3087243	SF3A1	7.51e-06	PMA	Ram	trans	2q33.2	204738919	G|A	CTLA4
rs3087243	DCBLD1	7.94e-06	PMA	Ram	trans	2q33.2	204738919	G|A	CTLA4
rs3087243	AMY2A	7.96e-06	PMA	Ram	trans	2q33.2	204738919	G|A	CTLA4
rs3087243	NRXN2	8.17e-06	PMA	Ram	trans	2q33.2	204738919	G|A	CTLA4
rs3087243	TCF15	1e-05	PMA	Ram	trans	2q33.2	204738919	G|A	CTLA4
rs3087243	BTBD12	1.1e-05	PMA	Ram	trans	2q33.2	204738919	G|A	CTLA4
rs3087243	ZNF69	1.12e-05	PMA	Ram	trans	2q33.2	204738919	G|A	CTLA4
rs3087243	NDUFA10	1.36e-05	PMA	Ram	trans	2q33.2	204738919	G|A	CTLA4
rs3087243	RAB5B	1.39e-05	PMA	Ram	trans	2q33.2	204738919	G|A	CTLA4
rs3087243	MTDH	1.59e-05	PMA	Ram	trans	2q33.2	204738919	G|A	CTLA4
rs3087243	ZNF266	1.63e-05	PMA	Ram	trans	2q33.2	204738919	G|A	CTLA4
rs3087243	CHL1	1.65e-05	PMA	Ram	trans	2q33.2	204738919	G|A	CTLA4
rs3087243	HNRNPA2B1	1.68e-05	PMA	Ram	trans	2q33.2	204738919	G|A	CTLA4
rs3087243	AZI1	1.81e-05	PMA	Ram	trans	2q33.2	204738919	G|A	CTLA4
rs3087243	SLC26A6	1.89e-05	PMA	Ram	trans	2q33.2	204738919	G|A	CTLA4
rs3087243	ZNF394	2.06e-05	PMA	Ram	trans	2q33.2	204738919	G|A	CTLA4
rs3087243	IFNAR2	2.28e-05	PMA	Ram	trans	2q33.2	204738919	G|A	CTLA4
rs3087243	LOC100128288	2.29e-05	PMA	Ram	trans	2q33.2	204738919	G|A	CTLA4
rs3087243	ZNF187	2.33e-05	PMA	Ram	trans	2q33.2	204738919	G|A	CTLA4
rs3087243	ZFP91	2.45e-05	PMA	Ram	trans	2q33.2	204738919	G|A	CTLA4
rs3087243	FLJ37587	2.6e-05	PMA	Ram	trans	2q33.2	204738919	G|A	CTLA4
rs3087243	PPP1R16A	2.64e-05	PMA	Ram	trans	2q33.2	204738919	G|A	CTLA4
rs3087243	ST6GALNAC4	2.67e-05	PMA	Ram	trans	2q33.2	204738919	G|A	CTLA4
rs3087243	C12ORF57	1.95e-07	CD4	Ram	trans	2q33.2	204738919	G|A	CTLA4
rs3087243	ZNF12	1.78e-06	CD4	Ram	trans	2q33.2	204738919	G|A	CTLA4
rs3087243	APOO	1.74e-06	CD8	Ram	trans	2q33.2	204738919	G|A	CTLA4
rs231726	CTLA4	1.65e-06	IFN	FairFax	cis	2q33.2	204740866	C|T	Intergenic
rs231727	CTLA4	0.000348751	CD8	Ram	cis	2q33.2	204741550	G|A	Intergenic
rs231727	FADS2	3.32e-07	EBV-rest	Ram	trans	2q33.2	204741550	G|A	Intergenic
rs231727	SH3KBP1	8.27e-07	EBV-rest	Ram	trans	2q33.2	204741550	G|A	Intergenic
rs231727	TLR10	1.24e-06	EBV-rest	Ram	trans	2q33.2	204741550	G|A	Intergenic
rs231727	CCNYL1	1.42e-06	EBV-rest	Ram	trans	2q33.2	204741550	G|A	Intergenic
rs231727	AMOT	1.88e-06	EBV-rest	Ram	trans	2q33.2	204741550	G|A	Intergenic
rs231727	TLR10	4.57e-06	EBV-rest	Ram	trans	2q33.2	204741550	G|A	Intergenic
rs231727	ANKRD50	5.79e-06	EBV-rest	Ram	trans	2q33.2	204741550	G|A	Intergenic
rs231727	SLC35A1	6.44e-06	EBV-rest	Ram	trans	2q33.2	204741550	G|A	Intergenic
rs231727	DGCR5	9.02e-06	EBV-rest	Ram	trans	2q33.2	204741550	G|A	Intergenic
rs231727	VRK1	9.49e-06	EBV-rest	Ram	trans	2q33.2	204741550	G|A	Intergenic
rs231727	COPS8	1e-05	EBV-rest	Ram	trans	2q33.2	204741550	G|A	Intergenic
rs231727	OSGEP	1.4e-05	EBV-rest	Ram	trans	2q33.2	204741550	G|A	Intergenic
rs231727	RPP40	1.47e-05	EBV-rest	Ram	trans	2q33.2	204741550	G|A	Intergenic
rs231727	AES	1.66e-05	EBV-rest	Ram	trans	2q33.2	204741550	G|A	Intergenic
rs231727	TDP1	2.64e-08	PMA	Ram	trans	2q33.2	204741550	G|A	Intergenic
rs231727	BIRC2	5.69e-08	PMA	Ram	trans	2q33.2	204741550	G|A	Intergenic
rs231727	ZNF549	2.05e-07	PMA	Ram	trans	2q33.2	204741550	G|A	Intergenic
rs231727	MOBKL2A	5.48e-07	PMA	Ram	trans	2q33.2	204741550	G|A	Intergenic
rs231727	ZNF69	7.15e-07	PMA	Ram	trans	2q33.2	204741550	G|A	Intergenic
rs231727	NRXN2	8.87e-07	PMA	Ram	trans	2q33.2	204741550	G|A	Intergenic
rs231727	SMC4	1.07e-06	PMA	Ram	trans	2q33.2	204741550	G|A	Intergenic
rs231727	C3orf34	4.74e-06	PMA	Ram	trans	2q33.2	204741550	G|A	Intergenic
rs231727	WHSC1L1	5.25e-06	PMA	Ram	trans	2q33.2	204741550	G|A	Intergenic
rs231727	RABL3	8.51e-06	PMA	Ram	trans	2q33.2	204741550	G|A	Intergenic
rs231727	SENP6	1.06e-05	PMA	Ram	trans	2q33.2	204741550	G|A	Intergenic
rs231727	CACNG3	1.18e-05	PMA	Ram	trans	2q33.2	204741550	G|A	Intergenic
rs231727	ZNF394	1.25e-05	PMA	Ram	trans	2q33.2	204741550	G|A	Intergenic
rs231727	LRAP	1.27e-05	PMA	Ram	trans	2q33.2	204741550	G|A	Intergenic
rs231727	LOC401252	1.42e-05	PMA	Ram	trans	2q33.2	204741550	G|A	Intergenic
rs231727	LOC100128288	1.55e-05	PMA	Ram	trans	2q33.2	204741550	G|A	Intergenic
rs231727	RDH10	1.77e-05	PMA	Ram	trans	2q33.2	204741550	G|A	Intergenic
rs231727	LOC100130835	1.87e-05	PMA	Ram	trans	2q33.2	204741550	G|A	Intergenic
rs231727	CLCN7	1.95e-05	PMA	Ram	trans	2q33.2	204741550	G|A	Intergenic
rs231727	DNASE2	2.08e-05	PMA	Ram	trans	2q33.2	204741550	G|A	Intergenic
rs231727	PIK3R4	2.12e-05	PMA	Ram	trans	2q33.2	204741550	G|A	Intergenic
rs231727	ZMAT3	2.25e-05	PMA	Ram	trans	2q33.2	204741550	G|A	Intergenic
rs231727	MIR491	2.33e-05	PMA	Ram	trans	2q33.2	204741550	G|A	Intergenic
rs231727	RAD51C	2.35e-05	PMA	Ram	trans	2q33.2	204741550	G|A	Intergenic
rs231727	-	2.52e-05	PMA	Ram	trans	2q33.2	204741550	G|A	Intergenic
rs231727	TNFSF12	1.04e-06	CD8	Ram	trans	2q33.2	204741550	G|A	Intergenic
rs17268364	ICOS	0.0030033	Blood	Westra	cis	2q33.2	204777818	G|A	Intergenic
rs3731865	C2ORF62	4.86e-05	Naive	FairFax	cis	2q35	219250003	G|C	SLC11A1
rs3731865	C2ORF62	0.000279845	LPS24	FairFax	cis	2q35	219250003	G|C	SLC11A1
rs3731865	IL8RBP	0.00079834	IFN	FairFax	cis	2q35	219250003	G|C	SLC11A1
rs3731865	PNKD	5.21e-10	Naive	FairFax	cis	2q35	219250003	G|C	SLC11A1
rs3731865	PNKD	3.67e-06	mono	FairFax (2012)	cis	2q35	219250003	G|C	SLC11A1
rs3731865	PNKD	0.000668272	Naive	FairFax	cis	2q35	219250003	G|C	SLC11A1
rs3731865	SLC11A1	1.9e-35	LPS24	FairFax	cis	2q35	219250003	G|C	SLC11A1
rs3731865	SLC11A1	1.21e-29	Naive	FairFax	cis	2q35	219250003	G|C	SLC11A1
rs3731865	SLC11A1	1.35e-14	LPS2	FairFax	cis	2q35	219250003	G|C	SLC11A1
rs3731865	SLC11A1	3.8e-13	IFN	FairFax	cis	2q35	219250003	G|C	SLC11A1
rs3731865	SLC11A1	4.33e-06	CD4	Ram	cis	2q35	219250003	G|C	SLC11A1
rs3731865	DYNC1H1	1.3e-08	EBV-rest	Ram	trans	2q35	219250003	G|C	SLC11A1
rs3731865	CENPM	2.29e-07	EBV-rest	Ram	trans	2q35	219250003	G|C	SLC11A1
rs3731865	TNFSF14	3.65e-07	EBV-rest	Ram	trans	2q35	219250003	G|C	SLC11A1
rs3731865	FEZ1	7.89e-07	EBV-rest	Ram	trans	2q35	219250003	G|C	SLC11A1
rs3731865	CENPM	9.46e-07	EBV-rest	Ram	trans	2q35	219250003	G|C	SLC11A1
rs3731865	PRDM1	1.01e-06	EBV-rest	Ram	trans	2q35	219250003	G|C	SLC11A1
rs3731865	ARHGDIA	1.14e-06	EBV-rest	Ram	trans	2q35	219250003	G|C	SLC11A1
rs3731865	CDC42EP4	1.57e-06	EBV-rest	Ram	trans	2q35	219250003	G|C	SLC11A1
rs3731865	MKNK2	1.79e-06	EBV-rest	Ram	trans	2q35	219250003	G|C	SLC11A1
rs3731865	IL27RA	1.9e-06	EBV-rest	Ram	trans	2q35	219250003	G|C	SLC11A1
rs3731865	TYSND1	2.97e-06	EBV-rest	Ram	trans	2q35	219250003	G|C	SLC11A1
rs3731865	NEK6	3.14e-06	EBV-rest	Ram	trans	2q35	219250003	G|C	SLC11A1
rs3731865	TNFSF14	4.19e-06	EBV-rest	Ram	trans	2q35	219250003	G|C	SLC11A1
rs3731865	LYPD6B	5.3e-06	EBV-rest	Ram	trans	2q35	219250003	G|C	SLC11A1
rs3731865	LGALS3BP	5.67e-06	EBV-rest	Ram	trans	2q35	219250003	G|C	SLC11A1
rs3731865	FEZ1	5.93e-06	EBV-rest	Ram	trans	2q35	219250003	G|C	SLC11A1
rs3731865	TLE4	5.96e-06	EBV-rest	Ram	trans	2q35	219250003	G|C	SLC11A1
rs3731865	SLC30A7	6.49e-06	EBV-rest	Ram	trans	2q35	219250003	G|C	SLC11A1
rs3731865	SPIRE1	7.13e-06	EBV-rest	Ram	trans	2q35	219250003	G|C	SLC11A1
rs3731865	FEZ1	7.92e-06	EBV-rest	Ram	trans	2q35	219250003	G|C	SLC11A1
rs3731865	NT5E	8.06e-06	EBV-rest	Ram	trans	2q35	219250003	G|C	SLC11A1
rs3731865	C1orf218	8.54e-06	EBV-rest	Ram	trans	2q35	219250003	G|C	SLC11A1
rs3731865	TNFRSF11B	9.77e-06	EBV-rest	Ram	trans	2q35	219250003	G|C	SLC11A1
rs3731865	FAM101B	1.13e-05	EBV-rest	Ram	trans	2q35	219250003	G|C	SLC11A1
rs3731865	SERPINB1	1.18e-05	EBV-rest	Ram	trans	2q35	219250003	G|C	SLC11A1
rs3731865	SCNN1B	1.57e-05	EBV-rest	Ram	trans	2q35	219250003	G|C	SLC11A1
rs3731865	PARP9	1.62e-05	EBV-rest	Ram	trans	2q35	219250003	G|C	SLC11A1
rs3731865	PANK1	1.67e-05	EBV-rest	Ram	trans	2q35	219250003	G|C	SLC11A1
rs3731865	LITAF	1.73e-05	EBV-rest	Ram	trans	2q35	219250003	G|C	SLC11A1
rs3731865	MKNK2	9.02e-07	EBV-rest	Ram	trans	2q35	219250003	G|C	SLC11A1
rs3731865	FEZ1	2.28e-08	PMA	Ram	trans	2q35	219250003	G|C	SLC11A1
rs3731865	FEZ1	1.98e-07	PMA	Ram	trans	2q35	219250003	G|C	SLC11A1
rs3731865	JAM2	2.03e-07	PMA	Ram	trans	2q35	219250003	G|C	SLC11A1
rs3731865	NOTCH1	2.71e-07	PMA	Ram	trans	2q35	219250003	G|C	SLC11A1
rs3731865	C1orf106	2.86e-07	PMA	Ram	trans	2q35	219250003	G|C	SLC11A1
rs3731865	ID3	3.48e-07	PMA	Ram	trans	2q35	219250003	G|C	SLC11A1
rs3731865	FEZ1	8.54e-07	PMA	Ram	trans	2q35	219250003	G|C	SLC11A1
rs3731865	C1orf162	1.39e-06	PMA	Ram	trans	2q35	219250003	G|C	SLC11A1
rs3731865	N6AMT1	1.44e-06	PMA	Ram	trans	2q35	219250003	G|C	SLC11A1
rs3731865	C8orf37	1.47e-06	PMA	Ram	trans	2q35	219250003	G|C	SLC11A1
rs3731865	LOH12CR1	1.85e-06	PMA	Ram	trans	2q35	219250003	G|C	SLC11A1
rs3731865	CEND1	2.06e-06	PMA	Ram	trans	2q35	219250003	G|C	SLC11A1
rs3731865	MAP3K8	2.21e-06	PMA	Ram	trans	2q35	219250003	G|C	SLC11A1
rs3731865	LTB	2.71e-06	PMA	Ram	trans	2q35	219250003	G|C	SLC11A1
rs3731865	WIPI1	3.58e-06	PMA	Ram	trans	2q35	219250003	G|C	SLC11A1
rs3731865	FEZ1	4.73e-06	PMA	Ram	trans	2q35	219250003	G|C	SLC11A1
rs3731865	PPP2R2B	4.97e-06	PMA	Ram	trans	2q35	219250003	G|C	SLC11A1
rs3731865	TCF2	5.46e-06	PMA	Ram	trans	2q35	219250003	G|C	SLC11A1
rs3731865	LTB	7.66e-06	PMA	Ram	trans	2q35	219250003	G|C	SLC11A1
rs3731865	KTI12	8.62e-06	PMA	Ram	trans	2q35	219250003	G|C	SLC11A1
rs3731865	C11orf9	1.05e-05	PMA	Ram	trans	2q35	219250003	G|C	SLC11A1
rs3731865	ENO3	1.17e-05	PMA	Ram	trans	2q35	219250003	G|C	SLC11A1
rs3731865	LOC284215	1.66e-05	PMA	Ram	trans	2q35	219250003	G|C	SLC11A1
rs3731865	TMEM79	2.13e-05	PMA	Ram	trans	2q35	219250003	G|C	SLC11A1
rs3731865	IL16	2.16e-05	PMA	Ram	trans	2q35	219250003	G|C	SLC11A1
rs3731865	OMA1	2.32e-05	PMA	Ram	trans	2q35	219250003	G|C	SLC11A1
rs3731865	C21orf91	2.46e-05	PMA	Ram	trans	2q35	219250003	G|C	SLC11A1
rs3731865	PA2G4	2.62e-05	PMA	Ram	trans	2q35	219250003	G|C	SLC11A1
rs3731865	ATPAF1	8.6e-07	CD4	Ram	trans	2q35	219250003	G|C	SLC11A1
rs3731865	SLAMF6	1.09e-07	CD8	Ram	trans	2q35	219250003	G|C	SLC11A1
rs3731865	SH3KBP1	6.64e-07	CD8	Ram	trans	2q35	219250003	G|C	SLC11A1
rs3731865	LOC730313	1.89e-06	CD8	Ram	trans	2q35	219250003	G|C	SLC11A1
rs3731865	SHROOM4	2.2e-06	CD8	Ram	trans	2q35	219250003	G|C	SLC11A1
rs3731865	IGF2R	2.37e-06	CD8	Ram	trans	2q35	219250003	G|C	SLC11A1
rs3731865	LPHN3	2.5e-06	CD8	Ram	trans	2q35	219250003	G|C	SLC11A1
rs3731865	POLD1	3.05e-06	CD8	Ram	trans	2q35	219250003	G|C	SLC11A1
rs3816560	CTDSP1	3.29e-09	Blood	Westra	cis	2q35	219254842	T|C	SLC11A1
rs3816560	PNKD	4.93e-30	Blood	Westra	cis	2q35	219254842	T|C	SLC11A1
rs3816560	PNKD,TMBIM1,AC021016.5-1	0.000715943	Blood	Westra	cis	2q35	219254842	T|C	SLC11A1
rs3816560	SLC11A1	9.81e-198	Blood	Westra	cis	2q35	219254842	T|C	SLC11A1
rs3816560	ZNF142	0.000626211	Blood	Westra	cis	2q35	219254842	T|C	SLC11A1
rs11711054	CCR1	6.22e-06	Blood	Westra	cis	3p21.31	46345611	G|A	Intergenic
rs11711054	CCR3	3.02e-45	Blood	Westra	cis	3p21.31	46345611	G|A	Intergenic
rs11711054	C10orf76	1.24e-06	EBV-rest	Ram	trans	3p21.31	46345611	G|A	Intergenic
rs11711054	POU2AF1	8.31e-06	EBV-rest	Ram	trans	3p21.31	46345611	G|A	Intergenic
rs11711054	P2RY8	9.97e-06	EBV-rest	Ram	trans	3p21.31	46345611	G|A	Intergenic
rs11711054	C1orf85	1.01e-05	EBV-rest	Ram	trans	3p21.31	46345611	G|A	Intergenic
rs11711054	CCNB1	1.1e-05	EBV-rest	Ram	trans	3p21.31	46345611	G|A	Intergenic
rs11711054	TCERG1L	1.18e-05	EBV-rest	Ram	trans	3p21.31	46345611	G|A	Intergenic
rs11711054	SLC35B2	1.26e-05	EBV-rest	Ram	trans	3p21.31	46345611	G|A	Intergenic
rs11711054	BUB1	1.73e-05	EBV-rest	Ram	trans	3p21.31	46345611	G|A	Intergenic
rs11711054	C11orf73	6.18e-08	PMA	Ram	trans	3p21.31	46345611	G|A	Intergenic
rs11711054	SLC35B2	8.02e-08	PMA	Ram	trans	3p21.31	46345611	G|A	Intergenic
rs11711054	G3BP1	2.76e-07	PMA	Ram	trans	3p21.31	46345611	G|A	Intergenic
rs11711054	GOT1	2.42e-06	PMA	Ram	trans	3p21.31	46345611	G|A	Intergenic
rs11711054	-	2.56e-06	PMA	Ram	trans	3p21.31	46345611	G|A	Intergenic
rs11711054	INHBE	2.78e-06	PMA	Ram	trans	3p21.31	46345611	G|A	Intergenic
rs11711054	LOC100134504	2.78e-06	PMA	Ram	trans	3p21.31	46345611	G|A	Intergenic
rs11711054	LOC643903	3.9e-06	PMA	Ram	trans	3p21.31	46345611	G|A	Intergenic
rs11711054	LOC286367	4.91e-06	PMA	Ram	trans	3p21.31	46345611	G|A	Intergenic
rs11711054	CCDC91	5.32e-06	PMA	Ram	trans	3p21.31	46345611	G|A	Intergenic
rs11711054	GART	5.74e-06	PMA	Ram	trans	3p21.31	46345611	G|A	Intergenic
rs11711054	SLC5A6	6.24e-06	PMA	Ram	trans	3p21.31	46345611	G|A	Intergenic
rs11711054	ZNF334	8.15e-06	PMA	Ram	trans	3p21.31	46345611	G|A	Intergenic
rs11711054	SEL1L3	9.09e-06	PMA	Ram	trans	3p21.31	46345611	G|A	Intergenic
rs11711054	SFTPD	9.72e-06	PMA	Ram	trans	3p21.31	46345611	G|A	Intergenic
rs11711054	TCFL5	1.17e-05	PMA	Ram	trans	3p21.31	46345611	G|A	Intergenic
rs11711054	NPC1	1.21e-05	PMA	Ram	trans	3p21.31	46345611	G|A	Intergenic
rs11711054	UTX	1.23e-05	PMA	Ram	trans	3p21.31	46345611	G|A	Intergenic
rs11711054	SLC25A3	1.28e-05	PMA	Ram	trans	3p21.31	46345611	G|A	Intergenic
rs11711054	THAP10	1.37e-05	PMA	Ram	trans	3p21.31	46345611	G|A	Intergenic
rs11711054	SYNGR1	1.88e-05	PMA	Ram	trans	3p21.31	46345611	G|A	Intergenic
rs11711054	SF1	1.98e-05	PMA	Ram	trans	3p21.31	46345611	G|A	Intergenic
rs11711054	AKAP9	2.07e-05	PMA	Ram	trans	3p21.31	46345611	G|A	Intergenic
rs11711054	PSPH	2.39e-05	PMA	Ram	trans	3p21.31	46345611	G|A	Intergenic
rs11711054	GRAMD1B	9.39e-09	CD4	Ram	trans	3p21.31	46345611	G|A	Intergenic
rs11711054	NME4	2.47e-08	CD4	Ram	trans	3p21.31	46345611	G|A	Intergenic
rs11711054	ARAP2	3.16e-07	CD4	Ram	trans	3p21.31	46345611	G|A	Intergenic
rs11711054	CDNF	5.84e-07	CD4	Ram	trans	3p21.31	46345611	G|A	Intergenic
rs11711054	SNORD104	7.38e-07	CD4	Ram	trans	3p21.31	46345611	G|A	Intergenic
rs11711054	ZNF322A	7.7e-07	CD4	Ram	trans	3p21.31	46345611	G|A	Intergenic
rs11711054	VARS	9.75e-07	CD4	Ram	trans	3p21.31	46345611	G|A	Intergenic
rs11711054	SNORD35B	2.22e-06	CD4	Ram	trans	3p21.31	46345611	G|A	Intergenic
rs11711054	GRAMD1B	3.15e-07	CD4	Ram	trans	3p21.31	46345611	G|A	Intergenic
rs11711054	SS18L1	7.02e-07	CD8	Ram	trans	3p21.31	46345611	G|A	Intergenic
rs11711054	MTMR3	1.02e-06	CD8	Ram	trans	3p21.31	46345611	G|A	Intergenic
rs11711054	UBE2D2	1.82e-06	CD8	Ram	trans	3p21.31	46345611	G|A	Intergenic
rs11711054	LOC401561	1.84e-06	CD8	Ram	trans	3p21.31	46345611	G|A	Intergenic
rs11711054	PLD6	1.97e-06	CD8	Ram	trans	3p21.31	46345611	G|A	Intergenic
rs11711054	LOC644860	2.39e-06	CD8	Ram	trans	3p21.31	46345611	G|A	Intergenic
rs11711054	LOC653066	2.94e-06	CD8	Ram	trans	3p21.31	46345611	G|A	Intergenic
rs11711054	CLIP4	3.31e-06	CD8	Ram	trans	3p21.31	46345611	G|A	Intergenic
rs11711054	CNOT6	3.35e-06	CD8	Ram	trans	3p21.31	46345611	G|A	Intergenic
rs6441961	CCR3	5.72e-05	LPS24	FairFax	cis	3p21.31	46352384	T|C	Intergenic
rs6441961	CCR3	8.02e-05	Naive	FairFax	cis	3p21.31	46352384	T|C	Intergenic
rs6441961	CCR3	0.00251374	IFN	FairFax	cis	3p21.31	46352384	T|C	Intergenic
rs10517086	SLC29A1	4.74e-07	EBV-rest	Ram	trans	4p15.2	26085511	G|A	Intergenic
rs10517086	PTER	1.28e-06	EBV-rest	Ram	trans	4p15.2	26085511	G|A	Intergenic
rs10517086	HMGB1L1	2.58e-06	EBV-rest	Ram	trans	4p15.2	26085511	G|A	Intergenic
rs10517086	PA2G4	1.39e-05	EBV-rest	Ram	trans	4p15.2	26085511	G|A	Intergenic
rs10517086	TBC1D23	1.58e-05	EBV-rest	Ram	trans	4p15.2	26085511	G|A	Intergenic
rs10517086	CAMKK2	1.64e-05	EBV-rest	Ram	trans	4p15.2	26085511	G|A	Intergenic
rs10517086	SLC29A1	7.04e-07	EBV-rest	Ram	trans	4p15.2	26085511	G|A	Intergenic
rs10517086	HMGB1L1	6.39e-08	PMA	Ram	trans	4p15.2	26085511	G|A	Intergenic
rs10517086	EEF2	1.62e-06	PMA	Ram	trans	4p15.2	26085511	G|A	Intergenic
rs10517086	PTER	1.84e-06	PMA	Ram	trans	4p15.2	26085511	G|A	Intergenic
rs10517086	CD276	1.96e-06	PMA	Ram	trans	4p15.2	26085511	G|A	Intergenic
rs10517086	PSMB8	2.93e-06	PMA	Ram	trans	4p15.2	26085511	G|A	Intergenic
rs10517086	CAMKK2	6.18e-06	PMA	Ram	trans	4p15.2	26085511	G|A	Intergenic
rs10517086	OSBPL8	8.61e-06	PMA	Ram	trans	4p15.2	26085511	G|A	Intergenic
rs10517086	HMGB1L1	9.51e-06	PMA	Ram	trans	4p15.2	26085511	G|A	Intergenic
rs10517086	HEBP2	1.94e-05	PMA	Ram	trans	4p15.2	26085511	G|A	Intergenic
rs10517086	LINCR	2.01e-05	PMA	Ram	trans	4p15.2	26085511	G|A	Intergenic
rs10517086	C1orf97	2.39e-05	PMA	Ram	trans	4p15.2	26085511	G|A	Intergenic
rs10517086	CAPNS1	3.2e-07	CD8	Ram	trans	4p15.2	26085511	G|A	Intergenic
rs10517086	ITGA5	1.02e-06	CD8	Ram	trans	4p15.2	26085511	G|A	Intergenic
rs10517086	HCFC1R1	1.77e-06	CD8	Ram	trans	4p15.2	26085511	G|A	Intergenic
rs10517086	NUCB1	1.77e-06	CD8	Ram	trans	4p15.2	26085511	G|A	Intergenic
rs10517086	MXD4	2.73e-06	CD8	Ram	trans	4p15.2	26085511	G|A	Intergenic
rs10517086	LRP5L	3.06e-06	CD8	Ram	trans	4p15.2	26085511	G|A	Intergenic
rs10517086	SP4	3.1e-06	CD8	Ram	trans	4p15.2	26085511	G|A	Intergenic
rs10517086	MTHFD2	3.23e-06	CD8	Ram	trans	4p15.2	26085511	G|A	Intergenic
rs10517086	PFN1	2.32e-06	CD8	Ram	trans	4p15.2	26085511	G|A	Intergenic
rs4505848	NT5DC3	6.62e-08	EBV-rest	Ram	trans	4q27	123132492	A|G	KIAA1109
rs4505848	LOC643287	4.88e-07	EBV-rest	Ram	trans	4q27	123132492	A|G	KIAA1109
rs4505848	MRPL42	6.19e-07	EBV-rest	Ram	trans	4q27	123132492	A|G	KIAA1109
rs4505848	PRKCE	6.24e-07	EBV-rest	Ram	trans	4q27	123132492	A|G	KIAA1109
rs4505848	SEC11C	8.49e-07	EBV-rest	Ram	trans	4q27	123132492	A|G	KIAA1109
rs4505848	COPS5	9.17e-07	EBV-rest	Ram	trans	4q27	123132492	A|G	KIAA1109
rs4505848	ACLY	1.78e-06	EBV-rest	Ram	trans	4q27	123132492	A|G	KIAA1109
rs4505848	PANX1	2.07e-06	EBV-rest	Ram	trans	4q27	123132492	A|G	KIAA1109
rs4505848	LYPLAL1	2.12e-06	EBV-rest	Ram	trans	4q27	123132492	A|G	KIAA1109
rs4505848	OFD1	2.14e-06	EBV-rest	Ram	trans	4q27	123132492	A|G	KIAA1109
rs4505848	AMFR	2.53e-06	EBV-rest	Ram	trans	4q27	123132492	A|G	KIAA1109
rs4505848	KPNA2	3.06e-06	EBV-rest	Ram	trans	4q27	123132492	A|G	KIAA1109
rs4505848	CDC42BPA	3.41e-06	EBV-rest	Ram	trans	4q27	123132492	A|G	KIAA1109
rs4505848	BET1	5.39e-06	EBV-rest	Ram	trans	4q27	123132492	A|G	KIAA1109
rs4505848	CSRP2	5.42e-06	EBV-rest	Ram	trans	4q27	123132492	A|G	KIAA1109
rs4505848	PHF19	5.61e-06	EBV-rest	Ram	trans	4q27	123132492	A|G	KIAA1109
rs4505848	MRPS22	6e-06	EBV-rest	Ram	trans	4q27	123132492	A|G	KIAA1109
rs4505848	C14orf166	6.79e-06	EBV-rest	Ram	trans	4q27	123132492	A|G	KIAA1109
rs4505848	ARHGAP4	9.27e-06	EBV-rest	Ram	trans	4q27	123132492	A|G	KIAA1109
rs4505848	RTCD1	9.9e-06	EBV-rest	Ram	trans	4q27	123132492	A|G	KIAA1109
rs4505848	GCET2	1.08e-05	EBV-rest	Ram	trans	4q27	123132492	A|G	KIAA1109
rs4505848	WBP2	1.15e-05	EBV-rest	Ram	trans	4q27	123132492	A|G	KIAA1109
rs4505848	HERPUD1	1.2e-05	EBV-rest	Ram	trans	4q27	123132492	A|G	KIAA1109
rs4505848	IMPDH2	1.2e-05	EBV-rest	Ram	trans	4q27	123132492	A|G	KIAA1109
rs4505848	SIX3	1.2e-05	EBV-rest	Ram	trans	4q27	123132492	A|G	KIAA1109
rs4505848	APBA3	1.34e-05	EBV-rest	Ram	trans	4q27	123132492	A|G	KIAA1109
rs4505848	LOC100130123	1.41e-05	EBV-rest	Ram	trans	4q27	123132492	A|G	KIAA1109
rs4505848	LTBR	1.51e-05	EBV-rest	Ram	trans	4q27	123132492	A|G	KIAA1109
rs4505848	LY96	1.63e-05	EBV-rest	Ram	trans	4q27	123132492	A|G	KIAA1109
rs4505848	EDC4	1.79e-05	EBV-rest	Ram	trans	4q27	123132492	A|G	KIAA1109
rs4505848	PDCD10	3.72e-07	PMA	Ram	trans	4q27	123132492	A|G	KIAA1109
rs4505848	SIX3	4.52e-07	PMA	Ram	trans	4q27	123132492	A|G	KIAA1109
rs4505848	C16orf35	1.17e-06	PMA	Ram	trans	4q27	123132492	A|G	KIAA1109
rs4505848	SECISBP2L	1.2e-06	PMA	Ram	trans	4q27	123132492	A|G	KIAA1109
rs4505848	NKTR	1.81e-06	PMA	Ram	trans	4q27	123132492	A|G	KIAA1109
rs4505848	GCET2	3.42e-06	PMA	Ram	trans	4q27	123132492	A|G	KIAA1109
rs4505848	PHC2	3.61e-06	PMA	Ram	trans	4q27	123132492	A|G	KIAA1109
rs4505848	MCART1	4.8e-06	PMA	Ram	trans	4q27	123132492	A|G	KIAA1109
rs4505848	LOC401010	4.81e-06	PMA	Ram	trans	4q27	123132492	A|G	KIAA1109
rs4505848	BCL2L1	4.88e-06	PMA	Ram	trans	4q27	123132492	A|G	KIAA1109
rs4505848	FOXO4	5.89e-06	PMA	Ram	trans	4q27	123132492	A|G	KIAA1109
rs4505848	AMFR	9.66e-06	PMA	Ram	trans	4q27	123132492	A|G	KIAA1109
rs4505848	SNHG1	9.66e-06	PMA	Ram	trans	4q27	123132492	A|G	KIAA1109
rs4505848	OFD1	9.71e-06	PMA	Ram	trans	4q27	123132492	A|G	KIAA1109
rs4505848	ADCY7	1.08e-05	PMA	Ram	trans	4q27	123132492	A|G	KIAA1109
rs4505848	TPST1	1.14e-05	PMA	Ram	trans	4q27	123132492	A|G	KIAA1109
rs4505848	RNF121	1.17e-05	PMA	Ram	trans	4q27	123132492	A|G	KIAA1109
rs4505848	LOC728139	1.24e-05	PMA	Ram	trans	4q27	123132492	A|G	KIAA1109
rs4505848	ZNF189	1.36e-05	PMA	Ram	trans	4q27	123132492	A|G	KIAA1109
rs4505848	MIR586	1.37e-05	PMA	Ram	trans	4q27	123132492	A|G	KIAA1109
rs4505848	NUSAP1	1.41e-05	PMA	Ram	trans	4q27	123132492	A|G	KIAA1109
rs4505848	GCA	1.66e-05	PMA	Ram	trans	4q27	123132492	A|G	KIAA1109
rs4505848	PRRT3	1.72e-05	PMA	Ram	trans	4q27	123132492	A|G	KIAA1109
rs4505848	LOC646498	1.96e-05	PMA	Ram	trans	4q27	123132492	A|G	KIAA1109
rs4505848	IRF7	1.96e-05	PMA	Ram	trans	4q27	123132492	A|G	KIAA1109
rs4505848	KTELC1	1.96e-05	PMA	Ram	trans	4q27	123132492	A|G	KIAA1109
rs4505848	ENPP4	2e-05	PMA	Ram	trans	4q27	123132492	A|G	KIAA1109
rs4505848	SIK3	2.23e-05	PMA	Ram	trans	4q27	123132492	A|G	KIAA1109
rs4505848	CYP20A1	2.25e-05	PMA	Ram	trans	4q27	123132492	A|G	KIAA1109
rs4505848	SUV39H1	2.27e-05	PMA	Ram	trans	4q27	123132492	A|G	KIAA1109
rs4505848	LOC158318	2.31e-05	PMA	Ram	trans	4q27	123132492	A|G	KIAA1109
rs4505848	RHOG	2.31e-05	PMA	Ram	trans	4q27	123132492	A|G	KIAA1109
rs4505848	PSMD6	2.39e-05	PMA	Ram	trans	4q27	123132492	A|G	KIAA1109
rs4505848	SAFB	2.39e-05	PMA	Ram	trans	4q27	123132492	A|G	KIAA1109
rs4505848	IL12RB1	6.17e-07	CD4	Ram	trans	4q27	123132492	A|G	KIAA1109
rs4505848	LOC645157	6.49e-07	CD4	Ram	trans	4q27	123132492	A|G	KIAA1109
rs4505848	MTFR1	7.4e-07	CD4	Ram	trans	4q27	123132492	A|G	KIAA1109
rs4505848	ST7	1.31e-06	CD4	Ram	trans	4q27	123132492	A|G	KIAA1109
rs4505848	ATG9A	3.05e-08	CD8	Ram	trans	4q27	123132492	A|G	KIAA1109
rs4505848	CDC2L5	1.03e-07	CD8	Ram	trans	4q27	123132492	A|G	KIAA1109
rs4505848	PDPK1	9.11e-07	CD8	Ram	trans	4q27	123132492	A|G	KIAA1109
rs17388568	KIF5C	8.05e-07	EBV-rest	Ram	trans	4q27	123329362	G|A	ADAD1
rs17388568	ALG3	1.88e-06	EBV-rest	Ram	trans	4q27	123329362	G|A	ADAD1
rs17388568	HLA-H	2.59e-06	EBV-rest	Ram	trans	4q27	123329362	G|A	ADAD1
rs17388568	BCL7B	5.94e-06	EBV-rest	Ram	trans	4q27	123329362	G|A	ADAD1
rs17388568	CDC42BPA	6.73e-06	EBV-rest	Ram	trans	4q27	123329362	G|A	ADAD1
rs17388568	TAGLN	7.87e-06	EBV-rest	Ram	trans	4q27	123329362	G|A	ADAD1
rs17388568	LTBR	1.24e-05	EBV-rest	Ram	trans	4q27	123329362	G|A	ADAD1
rs17388568	APBA3	1.67e-05	EBV-rest	Ram	trans	4q27	123329362	G|A	ADAD1
rs17388568	SIX3	2.18e-07	PMA	Ram	trans	4q27	123329362	G|A	ADAD1
rs17388568	SECISBP2L	7.77e-07	PMA	Ram	trans	4q27	123329362	G|A	ADAD1
rs17388568	ZC3H8	9.9e-07	PMA	Ram	trans	4q27	123329362	G|A	ADAD1
rs17388568	PHC2	1.32e-06	PMA	Ram	trans	4q27	123329362	G|A	ADAD1
rs17388568	SNHG1	2.44e-06	PMA	Ram	trans	4q27	123329362	G|A	ADAD1
rs17388568	SLAIN2	2.63e-06	PMA	Ram	trans	4q27	123329362	G|A	ADAD1
rs17388568	TRIP10	3.93e-06	PMA	Ram	trans	4q27	123329362	G|A	ADAD1
rs17388568	LOC440341	4.12e-06	PMA	Ram	trans	4q27	123329362	G|A	ADAD1
rs17388568	FABP5	4.93e-06	PMA	Ram	trans	4q27	123329362	G|A	ADAD1
rs17388568	SNORA57	5.06e-06	PMA	Ram	trans	4q27	123329362	G|A	ADAD1
rs17388568	EXOSC4	5.27e-06	PMA	Ram	trans	4q27	123329362	G|A	ADAD1
rs17388568	RNF121	1.05e-05	PMA	Ram	trans	4q27	123329362	G|A	ADAD1
rs17388568	HLA-H	1.22e-05	PMA	Ram	trans	4q27	123329362	G|A	ADAD1
rs17388568	CTR9	1.26e-05	PMA	Ram	trans	4q27	123329362	G|A	ADAD1
rs17388568	ADD3	1.86e-05	PMA	Ram	trans	4q27	123329362	G|A	ADAD1
rs17388568	FIT1	1.95e-05	PMA	Ram	trans	4q27	123329362	G|A	ADAD1
rs17388568	LRIG1	2.02e-05	PMA	Ram	trans	4q27	123329362	G|A	ADAD1
rs17388568	-	2.14e-05	PMA	Ram	trans	4q27	123329362	G|A	ADAD1
rs17388568	CRIM1	2.2e-05	PMA	Ram	trans	4q27	123329362	G|A	ADAD1
rs17388568	HNRNPAB	2.27e-05	PMA	Ram	trans	4q27	123329362	G|A	ADAD1
rs17388568	IRF7	2.35e-05	PMA	Ram	trans	4q27	123329362	G|A	ADAD1
rs17388568	LOC728888	2.45e-05	PMA	Ram	trans	4q27	123329362	G|A	ADAD1
rs17388568	HLA-H	1.58e-08	PMA	Ram	trans	4q27	123329362	G|A	ADAD1
rs17388568	MTX1	9.48e-07	CD4	Ram	trans	4q27	123329362	G|A	ADAD1
rs17388568	SAR1B	1.16e-06	CD4	Ram	trans	4q27	123329362	G|A	ADAD1
rs17388568	C17ORF96	1.54e-06	CD4	Ram	trans	4q27	123329362	G|A	ADAD1
rs17388568	C2ORF79	1.54e-06	CD4	Ram	trans	4q27	123329362	G|A	ADAD1
rs17388568	SYTL2	1.96e-06	CD4	Ram	trans	4q27	123329362	G|A	ADAD1
rs17388568	C17ORF61	2.27e-06	CD4	Ram	trans	4q27	123329362	G|A	ADAD1
rs17388568	C9ORF40	3.06e-06	CD8	Ram	trans	4q27	123329362	G|A	ADAD1
rs2069763	NT5DC3	4.43e-07	EBV-rest	Ram	trans	4q27	123377482	C|A	IL2
rs2069763	LOC643287	4.97e-07	EBV-rest	Ram	trans	4q27	123377482	C|A	IL2
rs2069763	MRPL42	5.44e-07	EBV-rest	Ram	trans	4q27	123377482	C|A	IL2
rs2069763	PRKCE	5.94e-07	EBV-rest	Ram	trans	4q27	123377482	C|A	IL2
rs2069763	SEC11C	1.11e-06	EBV-rest	Ram	trans	4q27	123377482	C|A	IL2
rs2069763	CDC42BPA	1.32e-06	EBV-rest	Ram	trans	4q27	123377482	C|A	IL2
rs2069763	ACLY	1.86e-06	EBV-rest	Ram	trans	4q27	123377482	C|A	IL2
rs2069763	AMFR	1.9e-06	EBV-rest	Ram	trans	4q27	123377482	C|A	IL2
rs2069763	COPS5	2.36e-06	EBV-rest	Ram	trans	4q27	123377482	C|A	IL2
rs2069763	LYPLAL1	4.38e-06	EBV-rest	Ram	trans	4q27	123377482	C|A	IL2
rs2069763	PHF19	5.01e-06	EBV-rest	Ram	trans	4q27	123377482	C|A	IL2
rs2069763	MRPS22	5.16e-06	EBV-rest	Ram	trans	4q27	123377482	C|A	IL2
rs2069763	CSRP2	5.47e-06	EBV-rest	Ram	trans	4q27	123377482	C|A	IL2
rs2069763	OFD1	6.04e-06	EBV-rest	Ram	trans	4q27	123377482	C|A	IL2
rs2069763	BET1	6.49e-06	EBV-rest	Ram	trans	4q27	123377482	C|A	IL2
rs2069763	HERPUD1	6.54e-06	EBV-rest	Ram	trans	4q27	123377482	C|A	IL2
rs2069763	C14orf166	6.94e-06	EBV-rest	Ram	trans	4q27	123377482	C|A	IL2
rs2069763	ARHGAP4	6.95e-06	EBV-rest	Ram	trans	4q27	123377482	C|A	IL2
rs2069763	KPNA2	7.15e-06	EBV-rest	Ram	trans	4q27	123377482	C|A	IL2
rs2069763	PANX1	7.6e-06	EBV-rest	Ram	trans	4q27	123377482	C|A	IL2
rs2069763	DTX3	9.6e-06	EBV-rest	Ram	trans	4q27	123377482	C|A	IL2
rs2069763	SIX3	9.94e-06	EBV-rest	Ram	trans	4q27	123377482	C|A	IL2
rs2069763	LTBR	1.07e-05	EBV-rest	Ram	trans	4q27	123377482	C|A	IL2
rs2069763	IL7	1.12e-05	EBV-rest	Ram	trans	4q27	123377482	C|A	IL2
rs2069763	LOC100130123	1.2e-05	EBV-rest	Ram	trans	4q27	123377482	C|A	IL2
rs2069763	GCET2	1.45e-05	EBV-rest	Ram	trans	4q27	123377482	C|A	IL2
rs2069763	APBA3	1.6e-05	EBV-rest	Ram	trans	4q27	123377482	C|A	IL2
rs2069763	RTCD1	1.66e-05	EBV-rest	Ram	trans	4q27	123377482	C|A	IL2
rs2069763	SIX3	2.79e-07	PMA	Ram	trans	4q27	123377482	C|A	IL2
rs2069763	PDCD10	6.93e-07	PMA	Ram	trans	4q27	123377482	C|A	IL2
rs2069763	C16orf35	1.11e-06	PMA	Ram	trans	4q27	123377482	C|A	IL2
rs2069763	PHC2	1.74e-06	PMA	Ram	trans	4q27	123377482	C|A	IL2
rs2069763	GCET2	1.85e-06	PMA	Ram	trans	4q27	123377482	C|A	IL2
rs2069763	BCL2L1	2.23e-06	PMA	Ram	trans	4q27	123377482	C|A	IL2
rs2069763	SECISBP2L	3.72e-06	PMA	Ram	trans	4q27	123377482	C|A	IL2
rs2069763	NKTR	4.5e-06	PMA	Ram	trans	4q27	123377482	C|A	IL2
rs2069763	OFD1	6.71e-06	PMA	Ram	trans	4q27	123377482	C|A	IL2
rs2069763	LOC401010	6.85e-06	PMA	Ram	trans	4q27	123377482	C|A	IL2
rs2069763	MCART1	9.01e-06	PMA	Ram	trans	4q27	123377482	C|A	IL2
rs2069763	TPST1	9.65e-06	PMA	Ram	trans	4q27	123377482	C|A	IL2
rs2069763	FOXO4	9.65e-06	PMA	Ram	trans	4q27	123377482	C|A	IL2
rs2069763	AMFR	1.11e-05	PMA	Ram	trans	4q27	123377482	C|A	IL2
rs2069763	ENPP4	1.13e-05	PMA	Ram	trans	4q27	123377482	C|A	IL2
rs2069763	LOC728139	1.15e-05	PMA	Ram	trans	4q27	123377482	C|A	IL2
rs2069763	RNF121	1.34e-05	PMA	Ram	trans	4q27	123377482	C|A	IL2
rs2069763	LOC646498	1.37e-05	PMA	Ram	trans	4q27	123377482	C|A	IL2
rs2069763	IRF7	1.39e-05	PMA	Ram	trans	4q27	123377482	C|A	IL2
rs2069763	SNHG1	1.41e-05	PMA	Ram	trans	4q27	123377482	C|A	IL2
rs2069763	ADCY7	1.43e-05	PMA	Ram	trans	4q27	123377482	C|A	IL2
rs2069763	NUSAP1	1.43e-05	PMA	Ram	trans	4q27	123377482	C|A	IL2
rs2069763	PRRT3	1.82e-05	PMA	Ram	trans	4q27	123377482	C|A	IL2
rs2069763	SAFB	1.84e-05	PMA	Ram	trans	4q27	123377482	C|A	IL2
rs2069763	SUV39H1	1.89e-05	PMA	Ram	trans	4q27	123377482	C|A	IL2
rs2069763	RHOG	1.91e-05	PMA	Ram	trans	4q27	123377482	C|A	IL2
rs2069763	TIMM23	1.94e-05	PMA	Ram	trans	4q27	123377482	C|A	IL2
rs2069763	GCA	2.2e-05	PMA	Ram	trans	4q27	123377482	C|A	IL2
rs2069763	CYP20A1	2.21e-05	PMA	Ram	trans	4q27	123377482	C|A	IL2
rs2069763	ZNF189	2.54e-05	PMA	Ram	trans	4q27	123377482	C|A	IL2
rs2069763	TMEM145	2.64e-05	PMA	Ram	trans	4q27	123377482	C|A	IL2
rs2069763	PSMD6	2.69e-05	PMA	Ram	trans	4q27	123377482	C|A	IL2
rs2069763	IL12RB1	6.17e-07	CD4	Ram	trans	4q27	123377482	C|A	IL2
rs2069763	LOC645157	6.49e-07	CD4	Ram	trans	4q27	123377482	C|A	IL2
rs2069763	MTFR1	7.4e-07	CD4	Ram	trans	4q27	123377482	C|A	IL2
rs2069763	ST7	1.31e-06	CD4	Ram	trans	4q27	123377482	C|A	IL2
rs2069763	ATG9A	1.26e-08	CD8	Ram	trans	4q27	123377482	C|A	IL2
rs2069763	CDC2L5	6.77e-08	CD8	Ram	trans	4q27	123377482	C|A	IL2
rs2069763	PDPK1	2.32e-06	CD8	Ram	trans	4q27	123377482	C|A	IL2
rs2611215	TMEM192	0.000104	EBV-rest	Ram	cis	4q32.3	166574267	A|G	Intergenic
rs2611215	BAGE5	6.23e-07	CD4	Ram	trans	4q32.3	166574267	A|G	Intergenic
rs2611215	SKP1	3.51e-06	CD8	Ram	trans	4q32.3	166574267	A|G	Intergenic
rs2611215	C7ORF40	3.65e-06	CD8	Ram	trans	4q32.3	166574267	A|G	Intergenic
rs2611215	MLL5	3.66e-06	CD8	Ram	trans	4q32.3	166574267	A|G	Intergenic
rs2611215	IL2RG	3.66e-06	CD8	Ram	trans	4q32.3	166574267	A|G	Intergenic
rs6897932	CAPSL	0.000370934	LPS24	FairFax	cis	5p13.2	35874575	C|T	IL7R
rs6897932	IL7R	1.26e-22	LPS24	FairFax	cis	5p13.2	35874575	C|T	IL7R
rs6897932	IL7R	2.42e-08	IFN	FairFax	cis	5p13.2	35874575	C|T	IL7R
rs6897932	IL7R	2.66e-08	LPS2	FairFax	cis	5p13.2	35874575	C|T	IL7R
rs6897932	RANBP3L	0.000931955	Naive	FairFax	cis	5p13.2	35874575	C|T	IL7R
rs6897932	CDC42EP5	5.01e-08	EBV-rest	Ram	trans	5p13.2	35874575	C|T	IL7R
rs6897932	GLDC	2.26e-07	EBV-rest	Ram	trans	5p13.2	35874575	C|T	IL7R
rs6897932	LOC643287	1.61e-06	EBV-rest	Ram	trans	5p13.2	35874575	C|T	IL7R
rs6897932	CHDH	2.01e-06	EBV-rest	Ram	trans	5p13.2	35874575	C|T	IL7R
rs6897932	LYPD6B	7.07e-06	EBV-rest	Ram	trans	5p13.2	35874575	C|T	IL7R
rs6897932	IL17RB	1.03e-05	EBV-rest	Ram	trans	5p13.2	35874575	C|T	IL7R
rs6897932	LYPD6B	1.48e-05	EBV-rest	Ram	trans	5p13.2	35874575	C|T	IL7R
rs6897932	CNR1	1.74e-05	EBV-rest	Ram	trans	5p13.2	35874575	C|T	IL7R
rs6897932	CDC42EP5	3.36e-08	PMA	Ram	trans	5p13.2	35874575	C|T	IL7R
rs6897932	MNX1	5.01e-08	PMA	Ram	trans	5p13.2	35874575	C|T	IL7R
rs6897932	KLF10	1.2e-07	PMA	Ram	trans	5p13.2	35874575	C|T	IL7R
rs6897932	ARHGAP17	4.82e-07	PMA	Ram	trans	5p13.2	35874575	C|T	IL7R
rs6897932	PIM3	1.11e-06	PMA	Ram	trans	5p13.2	35874575	C|T	IL7R
rs6897932	PTPRA	3.07e-06	PMA	Ram	trans	5p13.2	35874575	C|T	IL7R
rs6897932	PSMB8	4.25e-06	PMA	Ram	trans	5p13.2	35874575	C|T	IL7R
rs6897932	IL17RB	5.07e-06	PMA	Ram	trans	5p13.2	35874575	C|T	IL7R
rs6897932	LYPD6B	6.66e-06	PMA	Ram	trans	5p13.2	35874575	C|T	IL7R
rs6897932	COMMD3	6.78e-06	PMA	Ram	trans	5p13.2	35874575	C|T	IL7R
rs6897932	C9orf82	7.83e-06	PMA	Ram	trans	5p13.2	35874575	C|T	IL7R
rs6897932	RGS20	1.09e-05	PMA	Ram	trans	5p13.2	35874575	C|T	IL7R
rs6897932	MT1X	1.13e-05	PMA	Ram	trans	5p13.2	35874575	C|T	IL7R
rs6897932	WDR19	1.27e-05	PMA	Ram	trans	5p13.2	35874575	C|T	IL7R
rs6897932	FLYWCH1	1.29e-05	PMA	Ram	trans	5p13.2	35874575	C|T	IL7R
rs6897932	SLFN11	1.39e-05	PMA	Ram	trans	5p13.2	35874575	C|T	IL7R
rs6897932	C4orf34	1.6e-05	PMA	Ram	trans	5p13.2	35874575	C|T	IL7R
rs6897932	FAM161A	1.73e-05	PMA	Ram	trans	5p13.2	35874575	C|T	IL7R
rs6897932	LYPD6B	2.21e-05	PMA	Ram	trans	5p13.2	35874575	C|T	IL7R
rs6897932	ARHGAP17	2.56e-05	PMA	Ram	trans	5p13.2	35874575	C|T	IL7R
rs6897932	MT1E	2.62e-05	PMA	Ram	trans	5p13.2	35874575	C|T	IL7R
rs6897932	BCL7C	1.6e-08	CD4	Ram	trans	5p13.2	35874575	C|T	IL7R
rs6897932	LOC196752	9.75e-07	CD4	Ram	trans	5p13.2	35874575	C|T	IL7R
rs6897932	CD37	1.99e-06	CD4	Ram	trans	5p13.2	35874575	C|T	IL7R
rs11742240	IL7R	0.0034313	Blood	Westra	cis	5p13.2	35881376	G|T	IL7R
rs11957503	IL7R	1.05e-09	Blood	Westra	cis	5p13.2	35883176	T|G	Intergenic
rs11954020	IL22RA2	3.45e-06	CD8	Ram	trans	5p13.2	35883251	C|G	Intergenic
rs11954020	LOC392787	3.47e-06	CD8	Ram	trans	5p13.2	35883251	C|G	Intergenic
rs2194225	IL7R	1.65e-07	LPS24	FairFax	cis	5p13.2	35883804	T|C	Intergenic
rs597325	ANKRD6	0.000168733	PMA	Ram	cis	6q15	91002494	A|G	BACH2
rs597325	LYRM2	0.000238087	PMA	Ram	cis	6q15	91002494	A|G	BACH2
rs597325	NT5E	1.31e-08	EBV-rest	Ram	trans	6q15	91002494	A|G	BACH2
rs597325	TNIK	1.63e-07	EBV-rest	Ram	trans	6q15	91002494	A|G	BACH2
rs597325	NR2F2	4.5e-07	EBV-rest	Ram	trans	6q15	91002494	A|G	BACH2
rs597325	CTNNA1	2.42e-06	EBV-rest	Ram	trans	6q15	91002494	A|G	BACH2
rs597325	EDEM1	2.87e-06	EBV-rest	Ram	trans	6q15	91002494	A|G	BACH2
rs597325	P4HA1	3.53e-06	EBV-rest	Ram	trans	6q15	91002494	A|G	BACH2
rs597325	C21orf7	4.12e-06	EBV-rest	Ram	trans	6q15	91002494	A|G	BACH2
rs597325	LRIG1	5.88e-06	EBV-rest	Ram	trans	6q15	91002494	A|G	BACH2
rs597325	TBCE	5.94e-06	EBV-rest	Ram	trans	6q15	91002494	A|G	BACH2
rs597325	OTUD4	8.26e-06	EBV-rest	Ram	trans	6q15	91002494	A|G	BACH2
rs597325	TRAK1	1.21e-05	EBV-rest	Ram	trans	6q15	91002494	A|G	BACH2
rs597325	TMEM154	1.26e-05	EBV-rest	Ram	trans	6q15	91002494	A|G	BACH2
rs597325	FAM18B	1.28e-05	EBV-rest	Ram	trans	6q15	91002494	A|G	BACH2
rs597325	LRP5L	1.41e-05	EBV-rest	Ram	trans	6q15	91002494	A|G	BACH2
rs597325	MYOF	1.65e-05	EBV-rest	Ram	trans	6q15	91002494	A|G	BACH2
rs597325	C16orf35	1.73e-05	EBV-rest	Ram	trans	6q15	91002494	A|G	BACH2
rs597325	EDEM1	1.18e-07	EBV-rest	Ram	trans	6q15	91002494	A|G	BACH2
rs597325	NT5E	7.09e-07	EBV-rest	Ram	trans	6q15	91002494	A|G	BACH2
rs597325	TBC1D9	1.15e-07	PMA	Ram	trans	6q15	91002494	A|G	BACH2
rs597325	TNIK	1.27e-06	PMA	Ram	trans	6q15	91002494	A|G	BACH2
rs597325	NR2F2	1.99e-06	PMA	Ram	trans	6q15	91002494	A|G	BACH2
rs597325	GRIN1	3.38e-06	PMA	Ram	trans	6q15	91002494	A|G	BACH2
rs597325	RAB15	4.71e-06	PMA	Ram	trans	6q15	91002494	A|G	BACH2
rs597325	FSCN1	5.1e-06	PMA	Ram	trans	6q15	91002494	A|G	BACH2
rs597325	ARL6IP5	6.94e-06	PMA	Ram	trans	6q15	91002494	A|G	BACH2
rs597325	FER1L3	1.09e-05	PMA	Ram	trans	6q15	91002494	A|G	BACH2
rs597325	LRP5L	1.2e-05	PMA	Ram	trans	6q15	91002494	A|G	BACH2
rs597325	EDEM1	1.64e-05	PMA	Ram	trans	6q15	91002494	A|G	BACH2
rs597325	TM7SF2	2.53e-05	PMA	Ram	trans	6q15	91002494	A|G	BACH2
rs597325	FER1L3	9.31e-08	PMA	Ram	trans	6q15	91002494	A|G	BACH2
rs597325	MYOF	2.25e-07	PMA	Ram	trans	6q15	91002494	A|G	BACH2
rs56297233	LYRM2	1.08e-06	PMA	Ram	cis	6q15	91014029	A|T	Intergenic
rs56297233	NR2F2	6.9e-08	EBV-rest	Ram	trans	6q15	91014029	A|T	Intergenic
rs56297233	DBI	1.89e-07	EBV-rest	Ram	trans	6q15	91014029	A|T	Intergenic
rs56297233	ANKRD37	1.26e-06	EBV-rest	Ram	trans	6q15	91014029	A|T	Intergenic
rs56297233	TIMD4	2.7e-06	EBV-rest	Ram	trans	6q15	91014029	A|T	Intergenic
rs56297233	LOC647349	4.19e-06	EBV-rest	Ram	trans	6q15	91014029	A|T	Intergenic
rs56297233	BOLA2	5.38e-06	EBV-rest	Ram	trans	6q15	91014029	A|T	Intergenic
rs56297233	FOXO3	5.46e-06	EBV-rest	Ram	trans	6q15	91014029	A|T	Intergenic
rs56297233	BNIP3L	5.53e-06	EBV-rest	Ram	trans	6q15	91014029	A|T	Intergenic
rs56297233	FLJ41352	9.67e-06	EBV-rest	Ram	trans	6q15	91014029	A|T	Intergenic
rs56297233	RABEP1	1.01e-05	EBV-rest	Ram	trans	6q15	91014029	A|T	Intergenic
rs56297233	ADARB1	1.17e-05	EBV-rest	Ram	trans	6q15	91014029	A|T	Intergenic
rs56297233	DBI	5.08e-08	EBV-rest	Ram	trans	6q15	91014029	A|T	Intergenic
rs56297233	LRP5L	9.28e-08	PMA	Ram	trans	6q15	91014029	A|T	Intergenic
rs56297233	EDEM1	4.61e-07	PMA	Ram	trans	6q15	91014029	A|T	Intergenic
rs56297233	NR2F2	1.31e-06	PMA	Ram	trans	6q15	91014029	A|T	Intergenic
rs56297233	MTHFD2	2.15e-06	PMA	Ram	trans	6q15	91014029	A|T	Intergenic
rs56297233	ITPKB	4.59e-06	PMA	Ram	trans	6q15	91014029	A|T	Intergenic
rs56297233	C1orf106	6.16e-06	PMA	Ram	trans	6q15	91014029	A|T	Intergenic
rs56297233	NHP2	6.71e-06	PMA	Ram	trans	6q15	91014029	A|T	Intergenic
rs56297233	JAZF1	7.36e-06	PMA	Ram	trans	6q15	91014029	A|T	Intergenic
rs56297233	FGFR4	7.8e-06	PMA	Ram	trans	6q15	91014029	A|T	Intergenic
rs56297233	TMUB1	8.06e-06	PMA	Ram	trans	6q15	91014029	A|T	Intergenic
rs56297233	LOC441408	8.49e-06	PMA	Ram	trans	6q15	91014029	A|T	Intergenic
rs56297233	FOXO3	1.24e-05	PMA	Ram	trans	6q15	91014029	A|T	Intergenic
rs56297233	ATXN3	1.37e-05	PMA	Ram	trans	6q15	91014029	A|T	Intergenic
rs56297233	TIMD4	1.4e-05	PMA	Ram	trans	6q15	91014029	A|T	Intergenic
rs56297233	EDF1	1.83e-05	PMA	Ram	trans	6q15	91014029	A|T	Intergenic
rs56297233	ZBP1	1.84e-05	PMA	Ram	trans	6q15	91014029	A|T	Intergenic
rs56297233	FAM110B	1.92e-05	PMA	Ram	trans	6q15	91014029	A|T	Intergenic
rs56297233	GPER	2.13e-05	PMA	Ram	trans	6q15	91014029	A|T	Intergenic
rs56297233	COL22A1	2.32e-05	PMA	Ram	trans	6q15	91014029	A|T	Intergenic
rs56297233	ARPP19	2.6e-06	CD8	Ram	trans	6q15	91014029	A|T	Intergenic
rs9388489	C6ORF173	1.39e-26	LPS24	FairFax	cis	6q22.32	126698719	A|G	CENPW
rs9388489	C6ORF173	4.92e-19	LPS2	FairFax	cis	6q22.32	126698719	A|G	CENPW
rs9388489	C6ORF173	5.56e-13	IFN	FairFax	cis	6q22.32	126698719	A|G	CENPW
rs9388489	C6ORF173	4.56e-07	CD8	Ram	cis	6q22.32	126698719	A|G	CENPW
rs9388489	C6ORF173	8.35e-06	CD4	Ram	cis	6q22.32	126698719	A|G	CENPW
rs9388489	C6ORF173	9.86e-06	CD8	Ram	cis	6q22.32	126698719	A|G	CENPW
rs9388489	C6ORF173	0.000144427	CD4	Ram	cis	6q22.32	126698719	A|G	CENPW
rs9388489	AP2A1	4.24e-07	EBV-rest	Ram	trans	6q22.32	126698719	A|G	CENPW
rs9388489	CECR7	1.5e-06	EBV-rest	Ram	trans	6q22.32	126698719	A|G	CENPW
rs9388489	BAMBI	3.87e-06	EBV-rest	Ram	trans	6q22.32	126698719	A|G	CENPW
rs9388489	SARS2	4.3e-06	EBV-rest	Ram	trans	6q22.32	126698719	A|G	CENPW
rs9388489	LOC728249	7.18e-06	EBV-rest	Ram	trans	6q22.32	126698719	A|G	CENPW
rs9388489	NUMA1	1.07e-05	EBV-rest	Ram	trans	6q22.32	126698719	A|G	CENPW
rs9388489	FGR	1.52e-05	EBV-rest	Ram	trans	6q22.32	126698719	A|G	CENPW
rs9388489	LOC644877	1.62e-05	EBV-rest	Ram	trans	6q22.32	126698719	A|G	CENPW
rs9388489	CECR7	4.96e-08	EBV-rest	Ram	trans	6q22.32	126698719	A|G	CENPW
rs9388489	C18orf56	1.15e-07	PMA	Ram	trans	6q22.32	126698719	A|G	CENPW
rs9388489	NLGN4Y	1.14e-06	PMA	Ram	trans	6q22.32	126698719	A|G	CENPW
rs9388489	CDKN2B	2.38e-06	PMA	Ram	trans	6q22.32	126698719	A|G	CENPW
rs9388489	NEU1	2.67e-06	PMA	Ram	trans	6q22.32	126698719	A|G	CENPW
rs9388489	FGR	3.98e-06	PMA	Ram	trans	6q22.32	126698719	A|G	CENPW
rs9388489	GBAS	6.95e-06	PMA	Ram	trans	6q22.32	126698719	A|G	CENPW
rs9388489	LOC653135	7.8e-06	PMA	Ram	trans	6q22.32	126698719	A|G	CENPW
rs9388489	NEDD8	8.65e-06	PMA	Ram	trans	6q22.32	126698719	A|G	CENPW
rs9388489	ZNF227	9.77e-06	PMA	Ram	trans	6q22.32	126698719	A|G	CENPW
rs9388489	LOC728139	1.27e-05	PMA	Ram	trans	6q22.32	126698719	A|G	CENPW
rs9388489	SMG7	1.39e-05	PMA	Ram	trans	6q22.32	126698719	A|G	CENPW
rs9388489	DNAJC10	1.39e-05	PMA	Ram	trans	6q22.32	126698719	A|G	CENPW
rs9388489	SEPN1	1.43e-05	PMA	Ram	trans	6q22.32	126698719	A|G	CENPW
rs9388489	-	1.48e-05	PMA	Ram	trans	6q22.32	126698719	A|G	CENPW
rs9388489	SLC1A5	1.54e-05	PMA	Ram	trans	6q22.32	126698719	A|G	CENPW
rs9388489	MCEE	1.55e-05	PMA	Ram	trans	6q22.32	126698719	A|G	CENPW
rs9388489	CD74	1.58e-05	PMA	Ram	trans	6q22.32	126698719	A|G	CENPW
rs9388489	ZHX2	1.7e-05	PMA	Ram	trans	6q22.32	126698719	A|G	CENPW
rs9388489	CAMLG	1.7e-05	PMA	Ram	trans	6q22.32	126698719	A|G	CENPW
rs9388489	-	2.02e-05	PMA	Ram	trans	6q22.32	126698719	A|G	CENPW
rs9388489	CADPS2	2.03e-05	PMA	Ram	trans	6q22.32	126698719	A|G	CENPW
rs9388489	GDEP	2.04e-05	PMA	Ram	trans	6q22.32	126698719	A|G	CENPW
rs9388489	DDX21	2.11e-05	PMA	Ram	trans	6q22.32	126698719	A|G	CENPW
rs9388489	GRK5	2.28e-05	PMA	Ram	trans	6q22.32	126698719	A|G	CENPW
rs9388489	OCEL1	2.31e-05	PMA	Ram	trans	6q22.32	126698719	A|G	CENPW
rs9388489	LRRC29	7.39e-07	CD8	Ram	trans	6q22.32	126698719	A|G	CENPW
rs13192841	IFNGR1	0.00034799	FLU-Baseline	Lee	cis	6q23.3	137967214	G|A	Intergenic
rs13192841	IFNGR1	0.00116515	FLU	Lee	cis	6q23.3	137967214	G|A	Intergenic
rs2327832	HEBP2	0.000425594	EBV-rest	Ram	cis	6q23.3	137973068	A|G	Intergenic
rs2327832	PCCA	1.25e-07	EBV-rest	Ram	trans	6q23.3	137973068	A|G	Intergenic
rs2327832	ADAD2	5.45e-07	EBV-rest	Ram	trans	6q23.3	137973068	A|G	Intergenic
rs2327832	NRIP1	8.16e-07	EBV-rest	Ram	trans	6q23.3	137973068	A|G	Intergenic
rs2327832	HIATL1	1.26e-06	EBV-rest	Ram	trans	6q23.3	137973068	A|G	Intergenic
rs2327832	FCN1	1.41e-06	EBV-rest	Ram	trans	6q23.3	137973068	A|G	Intergenic
rs2327832	BTG3	1.49e-06	EBV-rest	Ram	trans	6q23.3	137973068	A|G	Intergenic
rs2327832	AGBL5	2.53e-06	EBV-rest	Ram	trans	6q23.3	137973068	A|G	Intergenic
rs2327832	BBS4	4.5e-06	EBV-rest	Ram	trans	6q23.3	137973068	A|G	Intergenic
rs2327832	KCNK6	4.62e-06	EBV-rest	Ram	trans	6q23.3	137973068	A|G	Intergenic
rs2327832	CP110	5.84e-06	EBV-rest	Ram	trans	6q23.3	137973068	A|G	Intergenic
rs2327832	HLA-G	7.26e-06	EBV-rest	Ram	trans	6q23.3	137973068	A|G	Intergenic
rs2327832	C22orf39	7.43e-06	EBV-rest	Ram	trans	6q23.3	137973068	A|G	Intergenic
rs2327832	MRPL51	7.66e-06	EBV-rest	Ram	trans	6q23.3	137973068	A|G	Intergenic
rs2327832	MED19	9.7e-06	EBV-rest	Ram	trans	6q23.3	137973068	A|G	Intergenic
rs2327832	C3orf15	1.24e-05	EBV-rest	Ram	trans	6q23.3	137973068	A|G	Intergenic
rs2327832	SNORD57	1.28e-05	EBV-rest	Ram	trans	6q23.3	137973068	A|G	Intergenic
rs2327832	MTMR2	1.53e-05	EBV-rest	Ram	trans	6q23.3	137973068	A|G	Intergenic
rs2327832	CPNE1	1.55e-05	EBV-rest	Ram	trans	6q23.3	137973068	A|G	Intergenic
rs2327832	WFDC12	1.55e-05	EBV-rest	Ram	trans	6q23.3	137973068	A|G	Intergenic
rs2327832	HERPUD2	1.58e-05	EBV-rest	Ram	trans	6q23.3	137973068	A|G	Intergenic
rs2327832	CHD2	2.22e-07	PMA	Ram	trans	6q23.3	137973068	A|G	Intergenic
rs2327832	AVL9	1.11e-06	PMA	Ram	trans	6q23.3	137973068	A|G	Intergenic
rs2327832	BRPF1	6.17e-06	PMA	Ram	trans	6q23.3	137973068	A|G	Intergenic
rs2327832	AIFM1	7.69e-06	PMA	Ram	trans	6q23.3	137973068	A|G	Intergenic
rs2327832	KLF10	8.34e-06	PMA	Ram	trans	6q23.3	137973068	A|G	Intergenic
rs2327832	NRIP1	1.06e-05	PMA	Ram	trans	6q23.3	137973068	A|G	Intergenic
rs2327832	PNN	2.34e-05	PMA	Ram	trans	6q23.3	137973068	A|G	Intergenic
rs2327832	ATP5G2	2.56e-05	PMA	Ram	trans	6q23.3	137973068	A|G	Intergenic
rs10499194	IFNGR1	2.07e-07	EBV-rest	Ram	cis	6q23.3	138002637	C|T	Intergenic
rs10499194	TUBB6	6.09e-09	EBV-rest	Ram	trans	6q23.3	138002637	C|T	Intergenic
rs10499194	C6orf174	4.43e-07	EBV-rest	Ram	trans	6q23.3	138002637	C|T	Intergenic
rs10499194	GNA12	6.77e-07	EBV-rest	Ram	trans	6q23.3	138002637	C|T	Intergenic
rs10499194	ITGB7	1.86e-06	EBV-rest	Ram	trans	6q23.3	138002637	C|T	Intergenic
rs10499194	ARHGAP25	3.83e-06	EBV-rest	Ram	trans	6q23.3	138002637	C|T	Intergenic
rs10499194	METTL6	4.59e-06	EBV-rest	Ram	trans	6q23.3	138002637	C|T	Intergenic
rs10499194	CCL4L1	6.67e-06	EBV-rest	Ram	trans	6q23.3	138002637	C|T	Intergenic
rs10499194	PXMP4	7.71e-06	EBV-rest	Ram	trans	6q23.3	138002637	C|T	Intergenic
rs10499194	CD52	9.57e-06	EBV-rest	Ram	trans	6q23.3	138002637	C|T	Intergenic
rs10499194	PARL	1.15e-05	EBV-rest	Ram	trans	6q23.3	138002637	C|T	Intergenic
rs10499194	DNAH1	1.3e-05	EBV-rest	Ram	trans	6q23.3	138002637	C|T	Intergenic
rs10499194	CACNB2	1.39e-05	EBV-rest	Ram	trans	6q23.3	138002637	C|T	Intergenic
rs10499194	C15orf2	1.56e-05	EBV-rest	Ram	trans	6q23.3	138002637	C|T	Intergenic
rs10499194	SLC10A7	1.59e-05	EBV-rest	Ram	trans	6q23.3	138002637	C|T	Intergenic
rs10499194	LOC100129668	1.63e-05	EBV-rest	Ram	trans	6q23.3	138002637	C|T	Intergenic
rs10499194	TUBB6	4.45e-07	EBV-rest	Ram	trans	6q23.3	138002637	C|T	Intergenic
rs10499194	TUBB6	1.07e-09	PMA	Ram	trans	6q23.3	138002637	C|T	Intergenic
rs10499194	LOC728661	6.91e-08	PMA	Ram	trans	6q23.3	138002637	C|T	Intergenic
rs10499194	DMC1	8.24e-07	PMA	Ram	trans	6q23.3	138002637	C|T	Intergenic
rs10499194	PELI1	9.29e-07	PMA	Ram	trans	6q23.3	138002637	C|T	Intergenic
rs10499194	FRMD4B	1.95e-06	PMA	Ram	trans	6q23.3	138002637	C|T	Intergenic
rs10499194	LOC100129668	2.63e-06	PMA	Ram	trans	6q23.3	138002637	C|T	Intergenic
rs10499194	GABPB2	3.21e-06	PMA	Ram	trans	6q23.3	138002637	C|T	Intergenic
rs10499194	LOC728661	4.79e-06	PMA	Ram	trans	6q23.3	138002637	C|T	Intergenic
rs10499194	NEIL1	5.33e-06	PMA	Ram	trans	6q23.3	138002637	C|T	Intergenic
rs10499194	SDHAP2	5.63e-06	PMA	Ram	trans	6q23.3	138002637	C|T	Intergenic
rs10499194	CDH8	7.08e-06	PMA	Ram	trans	6q23.3	138002637	C|T	Intergenic
rs10499194	SAR1B	8.31e-06	PMA	Ram	trans	6q23.3	138002637	C|T	Intergenic
rs10499194	SFRS4	8.86e-06	PMA	Ram	trans	6q23.3	138002637	C|T	Intergenic
rs10499194	SFRS14	1.38e-05	PMA	Ram	trans	6q23.3	138002637	C|T	Intergenic
rs10499194	MAPKAPK2	1.45e-05	PMA	Ram	trans	6q23.3	138002637	C|T	Intergenic
rs10499194	CACNB2	1.56e-05	PMA	Ram	trans	6q23.3	138002637	C|T	Intergenic
rs10499194	LOC645058	1.8e-05	PMA	Ram	trans	6q23.3	138002637	C|T	Intergenic
rs10499194	ANXA11	1.88e-05	PMA	Ram	trans	6q23.3	138002637	C|T	Intergenic
rs10499194	CD52	2.14e-05	PMA	Ram	trans	6q23.3	138002637	C|T	Intergenic
rs10499194	GNA12	2.25e-05	PMA	Ram	trans	6q23.3	138002637	C|T	Intergenic
rs10499194	DMAP1	2.38e-05	PMA	Ram	trans	6q23.3	138002637	C|T	Intergenic
rs10499194	TUBB6	1.42e-08	PMA	Ram	trans	6q23.3	138002637	C|T	Intergenic
rs10499194	EHD1	1.44e-08	CD8	Ram	trans	6q23.3	138002637	C|T	Intergenic
rs10499194	GBP1	8.7e-07	CD8	Ram	trans	6q23.3	138002637	C|T	Intergenic
rs10499194	MAP2K5	6.14e-06	Blood	Westra	trans	6q23.3	138002637	C|T	Intergenic
rs1738074	RSPH3	0.000403781	Blood	Westra	cis	6q25.3	159465977	T|C	TAGAP
rs1738074	TAGAP	4.19e-05	IFN	FairFax	cis	6q25.3	159465977	T|C	TAGAP
rs1738074	TAGAP	0.000487741	Blood	Westra	cis	6q25.3	159465977	T|C	TAGAP
rs1738074	TAGAP	0.00581842	LPS24	FairFax	cis	6q25.3	159465977	T|C	TAGAP
rs1738074	TAGAP	0.00877172	LPS2	FairFax	cis	6q25.3	159465977	T|C	TAGAP
rs1738074	TCP1	0.000264015	CD4	Ram	cis	6q25.3	159465977	T|C	TAGAP
rs1738074	SMC2	1.23e-06	EBV-rest	Ram	trans	6q25.3	159465977	T|C	TAGAP
rs1738074	PLD1	1.26e-06	EBV-rest	Ram	trans	6q25.3	159465977	T|C	TAGAP
rs1738074	UPF2	4.95e-06	EBV-rest	Ram	trans	6q25.3	159465977	T|C	TAGAP
rs1738074	UPLP	8.98e-06	EBV-rest	Ram	trans	6q25.3	159465977	T|C	TAGAP
rs1738074	ZNF16	1.4e-05	EBV-rest	Ram	trans	6q25.3	159465977	T|C	TAGAP
rs1738074	SPG21	1.45e-05	EBV-rest	Ram	trans	6q25.3	159465977	T|C	TAGAP
rs1738074	FAM47B	1.64e-05	EBV-rest	Ram	trans	6q25.3	159465977	T|C	TAGAP
rs1738074	DDX17	1.68e-05	EBV-rest	Ram	trans	6q25.3	159465977	T|C	TAGAP
rs1738074	LOC388436	3e-07	PMA	Ram	trans	6q25.3	159465977	T|C	TAGAP
rs1738074	EXOSC7	5.13e-07	PMA	Ram	trans	6q25.3	159465977	T|C	TAGAP
rs1738074	SYMPK	1.63e-06	PMA	Ram	trans	6q25.3	159465977	T|C	TAGAP
rs1738074	JARID2	4.1e-06	PMA	Ram	trans	6q25.3	159465977	T|C	TAGAP
rs1738074	DDX17	4.87e-06	PMA	Ram	trans	6q25.3	159465977	T|C	TAGAP
rs1738074	MTMR4	5.57e-06	PMA	Ram	trans	6q25.3	159465977	T|C	TAGAP
rs1738074	SLC1A1	6.83e-06	PMA	Ram	trans	6q25.3	159465977	T|C	TAGAP
rs1738074	FAM127B	8.52e-06	PMA	Ram	trans	6q25.3	159465977	T|C	TAGAP
rs1738074	ZFYVE1	8.91e-06	PMA	Ram	trans	6q25.3	159465977	T|C	TAGAP
rs1738074	SLC22A24	1.06e-05	PMA	Ram	trans	6q25.3	159465977	T|C	TAGAP
rs1738074	LOC644172	1.15e-05	PMA	Ram	trans	6q25.3	159465977	T|C	TAGAP
rs1738074	IRF8	1.2e-05	PMA	Ram	trans	6q25.3	159465977	T|C	TAGAP
rs1738074	DYNC1H1	1.32e-05	PMA	Ram	trans	6q25.3	159465977	T|C	TAGAP
rs1738074	SRFBP1	1.34e-05	PMA	Ram	trans	6q25.3	159465977	T|C	TAGAP
rs1738074	POLDIP3	1.42e-05	PMA	Ram	trans	6q25.3	159465977	T|C	TAGAP
rs1738074	ARSF	1.62e-05	PMA	Ram	trans	6q25.3	159465977	T|C	TAGAP
rs1738074	PLD1	1.83e-05	PMA	Ram	trans	6q25.3	159465977	T|C	TAGAP
rs1738074	PRPF19	1.87e-05	PMA	Ram	trans	6q25.3	159465977	T|C	TAGAP
rs1738074	CEBPD	1.96e-05	PMA	Ram	trans	6q25.3	159465977	T|C	TAGAP
rs1738074	MT1X	2.23e-05	PMA	Ram	trans	6q25.3	159465977	T|C	TAGAP
rs1738074	LBR	7.27e-07	CD4	Ram	trans	6q25.3	159465977	T|C	TAGAP
rs1738074	KRT18	1.45e-06	CD8	Ram	trans	6q25.3	159465977	T|C	TAGAP
rs1738074	CSTF3	1.33e-05	Blood	Westra	trans	6q25.3	159465977	T|C	TAGAP
rs3801814	HOXA5	7.39e-09	Naive	FairFax	cis	7p15.2	26881302	T|G	SKAP2
rs3801814	SKAP2	9.3e-18	bcell	FairFax (2012)	cis	7p15.2	26881302	T|G	SKAP2
rs7804356	SKAP2	6.51e-155	Blood	Westra	cis	7p15.2	26891665	T|C	SKAP2
rs7804356	SKAP2	1.74e-65	Blood	Westra	cis	7p15.2	26891665	T|C	SKAP2
rs7804356	SKAP2	4.96e-07	PMA	Ram	cis	7p15.2	26891665	T|C	SKAP2
rs7804356	SKAP2	7.08e-07	EBV-rest	Ram	cis	7p15.2	26891665	T|C	SKAP2
rs7804356	SKAP2	3.23e-06	CD4	Ram	cis	7p15.2	26891665	T|C	SKAP2
rs7804356	SKAP2	7.34e-06	PMA	Ram	cis	7p15.2	26891665	T|C	SKAP2
rs7804356	SKAP2	1.15e-05	CD4	Ram	cis	7p15.2	26891665	T|C	SKAP2
rs7804356	SKAP2	2.09e-05	CD8	Ram	cis	7p15.2	26891665	T|C	SKAP2
rs7804356	SKAP2	3.47e-05	PMA	Ram	cis	7p15.2	26891665	T|C	SKAP2
rs7804356	SKAP2	0.000123164	EBV-rest	Ram	cis	7p15.2	26891665	T|C	SKAP2
rs7804356	SKAP2	0.00019624	CD4	Ram	cis	7p15.2	26891665	T|C	SKAP2
rs7804356	SKAP2	0.000333892	CD8	Peters	cis	7p15.2	26891665	T|C	SKAP2
rs7804356	SKAP2	0.000452958	CD8	Peters	cis	7p15.2	26891665	T|C	SKAP2
rs7804356	SLC39A8	1.56e-09	EBV-rest	Ram	trans	7p15.2	26891665	T|C	SKAP2
rs7804356	GPM6A	6.95e-08	EBV-rest	Ram	trans	7p15.2	26891665	T|C	SKAP2
rs7804356	SPAG1	8.12e-08	EBV-rest	Ram	trans	7p15.2	26891665	T|C	SKAP2
rs7804356	SERPINA9	2.73e-07	EBV-rest	Ram	trans	7p15.2	26891665	T|C	SKAP2
rs7804356	SERPINA9	5.55e-07	EBV-rest	Ram	trans	7p15.2	26891665	T|C	SKAP2
rs7804356	NME7	1.09e-06	EBV-rest	Ram	trans	7p15.2	26891665	T|C	SKAP2
rs7804356	FAM20C	1.27e-06	EBV-rest	Ram	trans	7p15.2	26891665	T|C	SKAP2
rs7804356	EMID1	1.93e-06	EBV-rest	Ram	trans	7p15.2	26891665	T|C	SKAP2
rs7804356	ANG	2.18e-06	EBV-rest	Ram	trans	7p15.2	26891665	T|C	SKAP2
rs7804356	AP3B1	2.57e-06	EBV-rest	Ram	trans	7p15.2	26891665	T|C	SKAP2
rs7804356	NCBP2	3.11e-06	EBV-rest	Ram	trans	7p15.2	26891665	T|C	SKAP2
rs7804356	PLA2G4C	3.88e-06	EBV-rest	Ram	trans	7p15.2	26891665	T|C	SKAP2
rs7804356	KYNU	5.59e-06	EBV-rest	Ram	trans	7p15.2	26891665	T|C	SKAP2
rs7804356	MGAT5	8.17e-06	EBV-rest	Ram	trans	7p15.2	26891665	T|C	SKAP2
rs7804356	PLAUR	8.33e-06	EBV-rest	Ram	trans	7p15.2	26891665	T|C	SKAP2
rs7804356	UPLP	1.15e-05	EBV-rest	Ram	trans	7p15.2	26891665	T|C	SKAP2
rs7804356	XPO1	1.15e-05	EBV-rest	Ram	trans	7p15.2	26891665	T|C	SKAP2
rs7804356	RGS1	1.19e-05	EBV-rest	Ram	trans	7p15.2	26891665	T|C	SKAP2
rs7804356	ZBTB24	1.19e-05	EBV-rest	Ram	trans	7p15.2	26891665	T|C	SKAP2
rs7804356	SLC7A5P1	1.24e-05	EBV-rest	Ram	trans	7p15.2	26891665	T|C	SKAP2
rs7804356	HEBP1	1.33e-05	EBV-rest	Ram	trans	7p15.2	26891665	T|C	SKAP2
rs7804356	FAM89A	1.63e-05	EBV-rest	Ram	trans	7p15.2	26891665	T|C	SKAP2
rs7804356	KIF24	1.78e-05	EBV-rest	Ram	trans	7p15.2	26891665	T|C	SKAP2
rs7804356	SLC39A8	4.78e-09	EBV-rest	Ram	trans	7p15.2	26891665	T|C	SKAP2
rs7804356	SEC61G	4.26e-09	PMA	Ram	trans	7p15.2	26891665	T|C	SKAP2
rs7804356	RRP15	4.82e-09	PMA	Ram	trans	7p15.2	26891665	T|C	SKAP2
rs7804356	TYMS	9.9e-09	PMA	Ram	trans	7p15.2	26891665	T|C	SKAP2
rs7804356	POLA2	1.58e-08	PMA	Ram	trans	7p15.2	26891665	T|C	SKAP2
rs7804356	NCAPD2	2.21e-08	PMA	Ram	trans	7p15.2	26891665	T|C	SKAP2
rs7804356	SLC39A8	1.03e-07	PMA	Ram	trans	7p15.2	26891665	T|C	SKAP2
rs7804356	SAR1B	3.53e-07	PMA	Ram	trans	7p15.2	26891665	T|C	SKAP2
rs7804356	NME7	3.81e-07	PMA	Ram	trans	7p15.2	26891665	T|C	SKAP2
rs7804356	NME7	1.62e-06	PMA	Ram	trans	7p15.2	26891665	T|C	SKAP2
rs7804356	DONSON	1.89e-06	PMA	Ram	trans	7p15.2	26891665	T|C	SKAP2
rs7804356	KIAA1279	2.52e-06	PMA	Ram	trans	7p15.2	26891665	T|C	SKAP2
rs7804356	PNPT1	2.53e-06	PMA	Ram	trans	7p15.2	26891665	T|C	SKAP2
rs7804356	HERC5	2.9e-06	PMA	Ram	trans	7p15.2	26891665	T|C	SKAP2
rs7804356	IL10	2.94e-06	PMA	Ram	trans	7p15.2	26891665	T|C	SKAP2
rs7804356	-	3.03e-06	PMA	Ram	trans	7p15.2	26891665	T|C	SKAP2
rs7804356	XPO1	3.33e-06	PMA	Ram	trans	7p15.2	26891665	T|C	SKAP2
rs7804356	NDUFAF2	3.45e-06	PMA	Ram	trans	7p15.2	26891665	T|C	SKAP2
rs7804356	CGGBP1	4.85e-06	PMA	Ram	trans	7p15.2	26891665	T|C	SKAP2
rs7804356	XRN2	4.93e-06	PMA	Ram	trans	7p15.2	26891665	T|C	SKAP2
rs7804356	KYNU	5.65e-06	PMA	Ram	trans	7p15.2	26891665	T|C	SKAP2
rs7804356	LIG3	6.44e-06	PMA	Ram	trans	7p15.2	26891665	T|C	SKAP2
rs7804356	MYH9	6.58e-06	PMA	Ram	trans	7p15.2	26891665	T|C	SKAP2
rs7804356	FAM119A	6.78e-06	PMA	Ram	trans	7p15.2	26891665	T|C	SKAP2
rs7804356	SLC29A2	7.13e-06	PMA	Ram	trans	7p15.2	26891665	T|C	SKAP2
rs7804356	MAG	7.29e-06	PMA	Ram	trans	7p15.2	26891665	T|C	SKAP2
rs7804356	NUCB2	8.54e-06	PMA	Ram	trans	7p15.2	26891665	T|C	SKAP2
rs7804356	COQ2	1.04e-05	PMA	Ram	trans	7p15.2	26891665	T|C	SKAP2
rs7804356	MCM6	1.12e-05	PMA	Ram	trans	7p15.2	26891665	T|C	SKAP2
rs7804356	LOC731314	1.26e-05	PMA	Ram	trans	7p15.2	26891665	T|C	SKAP2
rs7804356	SEC22B	1.27e-05	PMA	Ram	trans	7p15.2	26891665	T|C	SKAP2
rs7804356	ZNF84	1.44e-05	PMA	Ram	trans	7p15.2	26891665	T|C	SKAP2
rs7804356	CHAF1B	1.63e-05	PMA	Ram	trans	7p15.2	26891665	T|C	SKAP2
rs7804356	KYNU	1.8e-05	PMA	Ram	trans	7p15.2	26891665	T|C	SKAP2
rs7804356	LOC100129552	2.11e-05	PMA	Ram	trans	7p15.2	26891665	T|C	SKAP2
rs7804356	C14orf166	2.15e-05	PMA	Ram	trans	7p15.2	26891665	T|C	SKAP2
rs7804356	GOLGB1	2.15e-05	PMA	Ram	trans	7p15.2	26891665	T|C	SKAP2
rs7804356	C17orf89	2.16e-05	PMA	Ram	trans	7p15.2	26891665	T|C	SKAP2
rs7804356	ARL11	2.47e-05	PMA	Ram	trans	7p15.2	26891665	T|C	SKAP2
rs7804356	XRCC5	2.5e-05	PMA	Ram	trans	7p15.2	26891665	T|C	SKAP2
rs7804356	SHC1	2.66e-05	PMA	Ram	trans	7p15.2	26891665	T|C	SKAP2
rs7804356	TYMS	5.03e-07	PMA	Ram	trans	7p15.2	26891665	T|C	SKAP2
rs7804356	LHX3	2.76e-08	CD4	Ram	trans	7p15.2	26891665	T|C	SKAP2
rs7804356	CRYGB	3.27e-07	CD4	Ram	trans	7p15.2	26891665	T|C	SKAP2
rs7804356	SDCCAG3	7.11e-07	CD4	Ram	trans	7p15.2	26891665	T|C	SKAP2
rs7804356	SCARNA13	1.58e-06	CD4	Ram	trans	7p15.2	26891665	T|C	SKAP2
rs7804356	SLC48A1	2.29e-07	CD8	Ram	trans	7p15.2	26891665	T|C	SKAP2
rs7804356	LOC653683	1.63e-06	CD8	Ram	trans	7p15.2	26891665	T|C	SKAP2
rs7804356	DPP7	3.23e-06	CD8	Ram	trans	7p15.2	26891665	T|C	SKAP2
rs7804356	ST3GAL4	1.1e-05	Blood	Westra	trans	7p15.2	26891665	T|C	SKAP2
rs4132601	FIGNL1	1.33e-06	mono	FairFax (2012)	cis	7p12.2	50470604	T|G	IKZF1
rs4132601	FIGNL1	1.64e-05	Naive	FairFax	cis	7p12.2	50470604	T|G	IKZF1
rs4132601	FIGNL1	3.55e-05	Naive	FairFax	cis	7p12.2	50470604	T|G	IKZF1
rs4132601	FIGNL1	0.0007195	bcell	FairFax (2012)	cis	7p12.2	50470604	T|G	IKZF1
rs10272724	FIGNL1	0.000878494	Blood	Westra	cis	7p12.2	50477213	T|C	Intergenic
rs10272724	IKZF1	1.4e-07	CD4	Ram	cis	7p12.2	50477213	T|C	Intergenic
rs10272724	IKZF1	1.84e-07	EBV-rest	Ram	cis	7p12.2	50477213	T|C	Intergenic
rs10272724	IKZF1	7.03e-07	CD4	Ram	cis	7p12.2	50477213	T|C	Intergenic
rs10272724	IKZF1	3.03e-05	CD8	Ram	cis	7p12.2	50477213	T|C	Intergenic
rs10272724	IKZF1	3.77e-05	EBV-rest	Ram	cis	7p12.2	50477213	T|C	Intergenic
rs10272724	IKZF1	0.000169073	PMA	Ram	cis	7p12.2	50477213	T|C	Intergenic
rs10272724	SGCE	4.08e-08	EBV-rest	Ram	trans	7p12.2	50477213	T|C	Intergenic
rs10272724	ZMIZ1	7.71e-07	EBV-rest	Ram	trans	7p12.2	50477213	T|C	Intergenic
rs10272724	FEM1A	1.65e-06	EBV-rest	Ram	trans	7p12.2	50477213	T|C	Intergenic
rs10272724	CNIH	2.08e-06	EBV-rest	Ram	trans	7p12.2	50477213	T|C	Intergenic
rs10272724	ZNF470	2.61e-06	EBV-rest	Ram	trans	7p12.2	50477213	T|C	Intergenic
rs10272724	BBS4	2.91e-06	EBV-rest	Ram	trans	7p12.2	50477213	T|C	Intergenic
rs10272724	SMAP1	3.08e-06	EBV-rest	Ram	trans	7p12.2	50477213	T|C	Intergenic
rs10272724	ELF4	3.83e-06	EBV-rest	Ram	trans	7p12.2	50477213	T|C	Intergenic
rs10272724	TRIM21	4.57e-06	EBV-rest	Ram	trans	7p12.2	50477213	T|C	Intergenic
rs10272724	KHSRP	4.66e-06	EBV-rest	Ram	trans	7p12.2	50477213	T|C	Intergenic
rs10272724	SORT1	6.33e-06	EBV-rest	Ram	trans	7p12.2	50477213	T|C	Intergenic
rs10272724	RABGAP1L	6.42e-06	EBV-rest	Ram	trans	7p12.2	50477213	T|C	Intergenic
rs10272724	CAPN9	7.28e-06	EBV-rest	Ram	trans	7p12.2	50477213	T|C	Intergenic
rs10272724	S100A11	8.36e-06	EBV-rest	Ram	trans	7p12.2	50477213	T|C	Intergenic
rs10272724	ZFAND2A	1.15e-05	EBV-rest	Ram	trans	7p12.2	50477213	T|C	Intergenic
rs10272724	SH3GL1	1.31e-05	EBV-rest	Ram	trans	7p12.2	50477213	T|C	Intergenic
rs10272724	ARHGAP21	1.45e-05	EBV-rest	Ram	trans	7p12.2	50477213	T|C	Intergenic
rs10272724	C22orf39	1.47e-05	EBV-rest	Ram	trans	7p12.2	50477213	T|C	Intergenic
rs10272724	TICAM2	1.55e-05	EBV-rest	Ram	trans	7p12.2	50477213	T|C	Intergenic
rs10272724	LOC642548	1.75e-05	EBV-rest	Ram	trans	7p12.2	50477213	T|C	Intergenic
rs10272724	HES1	4.52e-08	PMA	Ram	trans	7p12.2	50477213	T|C	Intergenic
rs10272724	SMAP1	1.66e-07	PMA	Ram	trans	7p12.2	50477213	T|C	Intergenic
rs10272724	RRP12	1.03e-06	PMA	Ram	trans	7p12.2	50477213	T|C	Intergenic
rs10272724	C6orf108	1.71e-06	PMA	Ram	trans	7p12.2	50477213	T|C	Intergenic
rs10272724	AES	6.5e-06	PMA	Ram	trans	7p12.2	50477213	T|C	Intergenic
rs10272724	PHF19	7.14e-06	PMA	Ram	trans	7p12.2	50477213	T|C	Intergenic
rs10272724	PKP2	7.3e-06	PMA	Ram	trans	7p12.2	50477213	T|C	Intergenic
rs10272724	ZFAND2A	7.63e-06	PMA	Ram	trans	7p12.2	50477213	T|C	Intergenic
rs10272724	OR2A42	8.13e-06	PMA	Ram	trans	7p12.2	50477213	T|C	Intergenic
rs10272724	GNA12	8.54e-06	PMA	Ram	trans	7p12.2	50477213	T|C	Intergenic
rs10272724	UAP1L1	9.35e-06	PMA	Ram	trans	7p12.2	50477213	T|C	Intergenic
rs10272724	C10orf99	9.48e-06	PMA	Ram	trans	7p12.2	50477213	T|C	Intergenic
rs10272724	SGCE	9.63e-06	PMA	Ram	trans	7p12.2	50477213	T|C	Intergenic
rs10272724	GFPT1	1.01e-05	PMA	Ram	trans	7p12.2	50477213	T|C	Intergenic
rs10272724	RASSF5	1.19e-05	PMA	Ram	trans	7p12.2	50477213	T|C	Intergenic
rs10272724	BUB1B	1.27e-05	PMA	Ram	trans	7p12.2	50477213	T|C	Intergenic
rs10272724	ARHGAP21	1.44e-05	PMA	Ram	trans	7p12.2	50477213	T|C	Intergenic
rs10272724	CREB3L3	1.47e-05	PMA	Ram	trans	7p12.2	50477213	T|C	Intergenic
rs10272724	FLJ45244	1.53e-05	PMA	Ram	trans	7p12.2	50477213	T|C	Intergenic
rs10272724	EAF2	1.55e-05	PMA	Ram	trans	7p12.2	50477213	T|C	Intergenic
rs10272724	C14orf109	1.64e-05	PMA	Ram	trans	7p12.2	50477213	T|C	Intergenic
rs10272724	AGAP3	2.26e-05	PMA	Ram	trans	7p12.2	50477213	T|C	Intergenic
rs10272724	LOC728403	2.48e-05	PMA	Ram	trans	7p12.2	50477213	T|C	Intergenic
rs10272724	-	2.63e-05	PMA	Ram	trans	7p12.2	50477213	T|C	Intergenic
rs10272724	HES1	2.36e-07	PMA	Ram	trans	7p12.2	50477213	T|C	Intergenic
rs10272724	GMFB	3.88e-07	CD8	Ram	trans	7p12.2	50477213	T|C	Intergenic
rs10272724	C6ORF61	9.12e-07	CD8	Ram	trans	7p12.2	50477213	T|C	Intergenic
rs10272724	NSMCE2	1.48e-06	CD8	Ram	trans	7p12.2	50477213	T|C	Intergenic
rs10272724	C1ORF69	2.04e-06	CD8	Ram	trans	7p12.2	50477213	T|C	Intergenic
rs10272724	EXOC8	3.05e-06	CD8	Ram	trans	7p12.2	50477213	T|C	Intergenic
rs7020673	GLIS3	0.000161027	PMA	Ram	cis	9p24.2	4291747	C|G	GLIS3
rs7020673	LOC646939	2.63e-07	EBV-rest	Ram	trans	9p24.2	4291747	C|G	GLIS3
rs7020673	ZNF513	2.16e-06	EBV-rest	Ram	trans	9p24.2	4291747	C|G	GLIS3
rs7020673	MAP7D3	1.32e-05	EBV-rest	Ram	trans	9p24.2	4291747	C|G	GLIS3
rs7020673	GPATCH4	1.35e-05	EBV-rest	Ram	trans	9p24.2	4291747	C|G	GLIS3
rs7020673	PSME3	1.42e-05	EBV-rest	Ram	trans	9p24.2	4291747	C|G	GLIS3
rs7020673	PLCB2	2.48e-09	PMA	Ram	trans	9p24.2	4291747	C|G	GLIS3
rs7020673	FHL3	1.25e-08	PMA	Ram	trans	9p24.2	4291747	C|G	GLIS3
rs7020673	STXBP2	9.95e-07	PMA	Ram	trans	9p24.2	4291747	C|G	GLIS3
rs7020673	MOSPD3	1.51e-06	PMA	Ram	trans	9p24.2	4291747	C|G	GLIS3
rs7020673	ZNF215	1.6e-06	PMA	Ram	trans	9p24.2	4291747	C|G	GLIS3
rs7020673	UBE2V1	2.21e-06	PMA	Ram	trans	9p24.2	4291747	C|G	GLIS3
rs7020673	MRPS9	2.49e-06	PMA	Ram	trans	9p24.2	4291747	C|G	GLIS3
rs7020673	SP140	5.09e-06	PMA	Ram	trans	9p24.2	4291747	C|G	GLIS3
rs7020673	CLIC6	5.68e-06	PMA	Ram	trans	9p24.2	4291747	C|G	GLIS3
rs7020673	TMC6	5.69e-06	PMA	Ram	trans	9p24.2	4291747	C|G	GLIS3
rs7020673	NIN	5.97e-06	PMA	Ram	trans	9p24.2	4291747	C|G	GLIS3
rs7020673	OGFRL1	6.32e-06	PMA	Ram	trans	9p24.2	4291747	C|G	GLIS3
rs7020673	DEDD	8.3e-06	PMA	Ram	trans	9p24.2	4291747	C|G	GLIS3
rs7020673	EPB41L5	8.92e-06	PMA	Ram	trans	9p24.2	4291747	C|G	GLIS3
rs7020673	DOK4	9.5e-06	PMA	Ram	trans	9p24.2	4291747	C|G	GLIS3
rs7020673	TTRAP	1.19e-05	PMA	Ram	trans	9p24.2	4291747	C|G	GLIS3
rs7020673	PCM1	1.29e-05	PMA	Ram	trans	9p24.2	4291747	C|G	GLIS3
rs7020673	LOC644869	1.45e-05	PMA	Ram	trans	9p24.2	4291747	C|G	GLIS3
rs7020673	MAP2K4	1.5e-05	PMA	Ram	trans	9p24.2	4291747	C|G	GLIS3
rs7020673	GRB10	1.62e-05	PMA	Ram	trans	9p24.2	4291747	C|G	GLIS3
rs7020673	FAM53C	1.65e-05	PMA	Ram	trans	9p24.2	4291747	C|G	GLIS3
rs7020673	MAST3	1.72e-05	PMA	Ram	trans	9p24.2	4291747	C|G	GLIS3
rs7020673	PPAP2A	1.99e-05	PMA	Ram	trans	9p24.2	4291747	C|G	GLIS3
rs7020673	RNF145	2.03e-05	PMA	Ram	trans	9p24.2	4291747	C|G	GLIS3
rs7020673	MAD2L1BP	2.1e-05	PMA	Ram	trans	9p24.2	4291747	C|G	GLIS3
rs7020673	FHL3	5.74e-07	PMA	Ram	trans	9p24.2	4291747	C|G	GLIS3
rs7020673	ATP6V1D	1.12e-06	CD4	Ram	trans	9p24.2	4291747	C|G	GLIS3
rs7020673	ZNF507	1.16e-06	CD8	Ram	trans	9p24.2	4291747	C|G	GLIS3
rs10758593	PPAPDC2	0.00039112	CD4	Ram	cis	9p24.2	4292083	G|A	GLIS3
rs10758593	TMEM131	5.68e-07	EBV-rest	Ram	trans	9p24.2	4292083	G|A	GLIS3
rs10758593	LOC646939	6.99e-07	EBV-rest	Ram	trans	9p24.2	4292083	G|A	GLIS3
rs10758593	SMCR5	2.85e-06	EBV-rest	Ram	trans	9p24.2	4292083	G|A	GLIS3
rs10758593	ATP5O	4.5e-06	EBV-rest	Ram	trans	9p24.2	4292083	G|A	GLIS3
rs10758593	LRP10	4.73e-06	EBV-rest	Ram	trans	9p24.2	4292083	G|A	GLIS3
rs10758593	C1orf86	6.09e-06	EBV-rest	Ram	trans	9p24.2	4292083	G|A	GLIS3
rs10758593	TTLL5	6.4e-06	EBV-rest	Ram	trans	9p24.2	4292083	G|A	GLIS3
rs10758593	EXOSC3	8.55e-06	EBV-rest	Ram	trans	9p24.2	4292083	G|A	GLIS3
rs10758593	AMT	1.51e-05	EBV-rest	Ram	trans	9p24.2	4292083	G|A	GLIS3
rs10758593	ZNF695	4.76e-07	PMA	Ram	trans	9p24.2	4292083	G|A	GLIS3
rs10758593	FHL3	1.25e-06	PMA	Ram	trans	9p24.2	4292083	G|A	GLIS3
rs10758593	STXBP2	3e-06	PMA	Ram	trans	9p24.2	4292083	G|A	GLIS3
rs10758593	PLCB2	3.51e-06	PMA	Ram	trans	9p24.2	4292083	G|A	GLIS3
rs10758593	SMARCC2	1.18e-05	PMA	Ram	trans	9p24.2	4292083	G|A	GLIS3
rs10758593	RNF145	1.34e-05	PMA	Ram	trans	9p24.2	4292083	G|A	GLIS3
rs10758593	C1orf86	1.56e-05	PMA	Ram	trans	9p24.2	4292083	G|A	GLIS3
rs10758593	ZBTB46	1.58e-05	PMA	Ram	trans	9p24.2	4292083	G|A	GLIS3
rs10758593	MAD2L1BP	1.78e-05	PMA	Ram	trans	9p24.2	4292083	G|A	GLIS3
rs10758593	TAAR6	2.3e-05	PMA	Ram	trans	9p24.2	4292083	G|A	GLIS3
rs10758593	TTRAP	2.57e-05	PMA	Ram	trans	9p24.2	4292083	G|A	GLIS3
rs10758593	PICALM	7.64e-08	CD4	Ram	trans	9p24.2	4292083	G|A	GLIS3
rs10758593	IFT122	4.28e-07	CD4	Ram	trans	9p24.2	4292083	G|A	GLIS3
rs10758593	WDR33	5.28e-07	CD4	Ram	trans	9p24.2	4292083	G|A	GLIS3
rs10758593	C16ORF56	1.97e-07	CD8	Ram	trans	9p24.2	4292083	G|A	GLIS3
rs10758593	MKRN2	3.2e-07	CD8	Ram	trans	9p24.2	4292083	G|A	GLIS3
rs10758593	OBFC2A	6.99e-07	CD8	Ram	trans	9p24.2	4292083	G|A	GLIS3
rs10758593	ZNF507	1.19e-06	CD8	Ram	trans	9p24.2	4292083	G|A	GLIS3
rs10758593	TMCO3	1.79e-06	CD8	Ram	trans	9p24.2	4292083	G|A	GLIS3
rs10758593	C6ORF203	2.02e-06	CD8	Ram	trans	9p24.2	4292083	G|A	GLIS3
rs10758593	CYTH3	2.31e-06	CD8	Ram	trans	9p24.2	4292083	G|A	GLIS3
rs10758593	CXCR6	2.38e-06	CD8	Ram	trans	9p24.2	4292083	G|A	GLIS3
rs10758593	HNRNPAB	2.59e-06	CD8	Ram	trans	9p24.2	4292083	G|A	GLIS3
rs10758593	C6ORF204	2.7e-06	CD8	Ram	trans	9p24.2	4292083	G|A	GLIS3
rs10758593	CTAGE6	3.08e-06	CD8	Ram	trans	9p24.2	4292083	G|A	GLIS3
rs10758593	ME1	6.48e-07	CD8	Ram	trans	9p24.2	4292083	G|A	GLIS3
rs12251307	IL2RA	0.000106234	LPS24	FairFax	cis	10p15.1	6123495	C|T	Intergenic
rs12251307	IGFBP3	1.98e-06	EBV-rest	Ram	trans	10p15.1	6123495	C|T	Intergenic
rs12251307	EMILIN2	2.1e-06	EBV-rest	Ram	trans	10p15.1	6123495	C|T	Intergenic
rs12251307	CPNE1	2.26e-06	EBV-rest	Ram	trans	10p15.1	6123495	C|T	Intergenic
rs12251307	NUFIP2	5.28e-06	EBV-rest	Ram	trans	10p15.1	6123495	C|T	Intergenic
rs12251307	NCDN	5.35e-06	EBV-rest	Ram	trans	10p15.1	6123495	C|T	Intergenic
rs12251307	POLR3G	7e-06	EBV-rest	Ram	trans	10p15.1	6123495	C|T	Intergenic
rs12251307	BMP2K	9.44e-06	EBV-rest	Ram	trans	10p15.1	6123495	C|T	Intergenic
rs12251307	FAM50B	1.01e-05	EBV-rest	Ram	trans	10p15.1	6123495	C|T	Intergenic
rs12251307	NCF4	1.3e-05	EBV-rest	Ram	trans	10p15.1	6123495	C|T	Intergenic
rs12251307	C7orf61	1.31e-05	EBV-rest	Ram	trans	10p15.1	6123495	C|T	Intergenic
rs12251307	FLJ23172	1.47e-05	EBV-rest	Ram	trans	10p15.1	6123495	C|T	Intergenic
rs12251307	PTPLAD2	1.76e-05	EBV-rest	Ram	trans	10p15.1	6123495	C|T	Intergenic
rs12251307	IGFBP3	1.77e-05	EBV-rest	Ram	trans	10p15.1	6123495	C|T	Intergenic
rs12251307	CPNE1	3.14e-08	EBV-rest	Ram	trans	10p15.1	6123495	C|T	Intergenic
rs12251307	DERA	2.89e-07	EBV-rest	Ram	trans	10p15.1	6123495	C|T	Intergenic
rs12251307	CDKN2A	3.04e-07	EBV-rest	Ram	trans	10p15.1	6123495	C|T	Intergenic
rs12251307	NBR2	3.73e-07	EBV-rest	Ram	trans	10p15.1	6123495	C|T	Intergenic
rs12251307	AGTPBP1	7.03e-07	EBV-rest	Ram	trans	10p15.1	6123495	C|T	Intergenic
rs12251307	EDNRA	7.81e-07	EBV-rest	Ram	trans	10p15.1	6123495	C|T	Intergenic
rs12251307	HMX2	8.39e-07	EBV-rest	Ram	trans	10p15.1	6123495	C|T	Intergenic
rs12251307	DERA	2.58e-09	PMA	Ram	trans	10p15.1	6123495	C|T	Intergenic
rs12251307	SASS6	8.53e-08	PMA	Ram	trans	10p15.1	6123495	C|T	Intergenic
rs12251307	ZNF326	2.67e-07	PMA	Ram	trans	10p15.1	6123495	C|T	Intergenic
rs12251307	CAMK2D	3.48e-07	PMA	Ram	trans	10p15.1	6123495	C|T	Intergenic
rs12251307	C14orf68	3.99e-07	PMA	Ram	trans	10p15.1	6123495	C|T	Intergenic
rs12251307	-	4.23e-07	PMA	Ram	trans	10p15.1	6123495	C|T	Intergenic
rs12251307	NFE2L2	9.47e-07	PMA	Ram	trans	10p15.1	6123495	C|T	Intergenic
rs12251307	CPNE1	2.05e-06	PMA	Ram	trans	10p15.1	6123495	C|T	Intergenic
rs12251307	PPP2R5D	3.59e-06	PMA	Ram	trans	10p15.1	6123495	C|T	Intergenic
rs12251307	CTRB2	3.77e-06	PMA	Ram	trans	10p15.1	6123495	C|T	Intergenic
rs12251307	ZNF326	3.97e-06	PMA	Ram	trans	10p15.1	6123495	C|T	Intergenic
rs12251307	ODF3B	5.42e-06	PMA	Ram	trans	10p15.1	6123495	C|T	Intergenic
rs12251307	AGTPBP1	5.84e-06	PMA	Ram	trans	10p15.1	6123495	C|T	Intergenic
rs12251307	EMILIN2	6.63e-06	PMA	Ram	trans	10p15.1	6123495	C|T	Intergenic
rs12251307	TXNDC3	6.96e-06	PMA	Ram	trans	10p15.1	6123495	C|T	Intergenic
rs12251307	AHI1	7.22e-06	PMA	Ram	trans	10p15.1	6123495	C|T	Intergenic
rs12251307	ZMYM6	8.96e-06	PMA	Ram	trans	10p15.1	6123495	C|T	Intergenic
rs12251307	VASH2	1.04e-05	PMA	Ram	trans	10p15.1	6123495	C|T	Intergenic
rs12251307	PRKACB	1.05e-05	PMA	Ram	trans	10p15.1	6123495	C|T	Intergenic
rs12251307	PCDHB9	1.08e-05	PMA	Ram	trans	10p15.1	6123495	C|T	Intergenic
rs12251307	LOC728734	1.1e-05	PMA	Ram	trans	10p15.1	6123495	C|T	Intergenic
rs12251307	OR4C46	1.41e-05	PMA	Ram	trans	10p15.1	6123495	C|T	Intergenic
rs12251307	MIR130A	1.44e-05	PMA	Ram	trans	10p15.1	6123495	C|T	Intergenic
rs12251307	GRB10	1.46e-05	PMA	Ram	trans	10p15.1	6123495	C|T	Intergenic
rs12251307	SNORA70	1.64e-05	PMA	Ram	trans	10p15.1	6123495	C|T	Intergenic
rs12251307	ADCY6	1.94e-05	PMA	Ram	trans	10p15.1	6123495	C|T	Intergenic
rs12251307	ERCC2	1.94e-05	PMA	Ram	trans	10p15.1	6123495	C|T	Intergenic
rs12251307	UBR7	2.04e-05	PMA	Ram	trans	10p15.1	6123495	C|T	Intergenic
rs12251307	AP1S1	2.13e-05	PMA	Ram	trans	10p15.1	6123495	C|T	Intergenic
rs12251307	ZNF761	2.17e-05	PMA	Ram	trans	10p15.1	6123495	C|T	Intergenic
rs12251307	PNPT1	2.18e-05	PMA	Ram	trans	10p15.1	6123495	C|T	Intergenic
rs12251307	FHL2	2.25e-05	PMA	Ram	trans	10p15.1	6123495	C|T	Intergenic
rs12251307	NOP2	2.36e-05	PMA	Ram	trans	10p15.1	6123495	C|T	Intergenic
rs12251307	TBC1D23	2.36e-05	PMA	Ram	trans	10p15.1	6123495	C|T	Intergenic
rs12251307	CAMK2D	2.51e-05	PMA	Ram	trans	10p15.1	6123495	C|T	Intergenic
rs12251307	WDHD1	2.54e-05	PMA	Ram	trans	10p15.1	6123495	C|T	Intergenic
rs12251307	ZBTB8A	2.56e-05	PMA	Ram	trans	10p15.1	6123495	C|T	Intergenic
rs12251307	CDKN2A	2.59e-05	PMA	Ram	trans	10p15.1	6123495	C|T	Intergenic
rs947474	PFKFB3	1.99e-05	EBV-rest	Ram	cis	10p15.1	6390450	G|A	Intergenic
rs947474	PFKFB3	5.97e-05	EBV-rest	Ram	cis	10p15.1	6390450	G|A	Intergenic
rs947474	PFKFB3	0.000110055	PMA	Ram	cis	10p15.1	6390450	G|A	Intergenic
rs947474	PFKFB3	0.00013728	PMA	Ram	cis	10p15.1	6390450	G|A	Intergenic
rs947474	PFKFB3	0.000203368	PMA	Ram	cis	10p15.1	6390450	G|A	Intergenic
rs947474	PFKFB3	0.000553476	PMA	Ram	cis	10p15.1	6390450	G|A	Intergenic
rs947474	MEIS2	3.39e-09	EBV-rest	Ram	trans	10p15.1	6390450	G|A	Intergenic
rs947474	PTP4A3	2e-08	EBV-rest	Ram	trans	10p15.1	6390450	G|A	Intergenic
rs947474	NOL12	1.27e-07	EBV-rest	Ram	trans	10p15.1	6390450	G|A	Intergenic
rs947474	PTK7	1e-06	EBV-rest	Ram	trans	10p15.1	6390450	G|A	Intergenic
rs947474	CORO2A	1.08e-06	EBV-rest	Ram	trans	10p15.1	6390450	G|A	Intergenic
rs947474	SLC25A23	1.8e-06	EBV-rest	Ram	trans	10p15.1	6390450	G|A	Intergenic
rs947474	SMARCC2	1.96e-06	EBV-rest	Ram	trans	10p15.1	6390450	G|A	Intergenic
rs947474	TRIP4	2.76e-06	EBV-rest	Ram	trans	10p15.1	6390450	G|A	Intergenic
rs947474	BASP1	5.86e-06	EBV-rest	Ram	trans	10p15.1	6390450	G|A	Intergenic
rs947474	CRY1	5.94e-06	EBV-rest	Ram	trans	10p15.1	6390450	G|A	Intergenic
rs947474	LOC100128269	9.89e-06	EBV-rest	Ram	trans	10p15.1	6390450	G|A	Intergenic
rs947474	MEOX1	1.7e-05	EBV-rest	Ram	trans	10p15.1	6390450	G|A	Intergenic
rs947474	MGC3731	1.73e-05	EBV-rest	Ram	trans	10p15.1	6390450	G|A	Intergenic
rs947474	ACY3	1.81e-05	EBV-rest	Ram	trans	10p15.1	6390450	G|A	Intergenic
rs947474	MEIS2	3.31e-08	EBV-rest	Ram	trans	10p15.1	6390450	G|A	Intergenic
rs947474	PTP4A3	9.34e-07	EBV-rest	Ram	trans	10p15.1	6390450	G|A	Intergenic
rs947474	GLB1	6.01e-07	PMA	Ram	trans	10p15.1	6390450	G|A	Intergenic
rs947474	MEIS2	9.77e-07	PMA	Ram	trans	10p15.1	6390450	G|A	Intergenic
rs947474	LAMA5	2.5e-06	PMA	Ram	trans	10p15.1	6390450	G|A	Intergenic
rs947474	CORO2A	2.66e-06	PMA	Ram	trans	10p15.1	6390450	G|A	Intergenic
rs947474	LOC653377	4.49e-06	PMA	Ram	trans	10p15.1	6390450	G|A	Intergenic
rs947474	IFITM3	5.66e-06	PMA	Ram	trans	10p15.1	6390450	G|A	Intergenic
rs947474	TMEM131	7.02e-06	PMA	Ram	trans	10p15.1	6390450	G|A	Intergenic
rs947474	FRG2B	7.71e-06	PMA	Ram	trans	10p15.1	6390450	G|A	Intergenic
rs947474	PTP4A3	7.88e-06	PMA	Ram	trans	10p15.1	6390450	G|A	Intergenic
rs947474	C20orf118	8.45e-06	PMA	Ram	trans	10p15.1	6390450	G|A	Intergenic
rs947474	ARHGAP1	1.18e-05	PMA	Ram	trans	10p15.1	6390450	G|A	Intergenic
rs947474	GPX7	1.25e-05	PMA	Ram	trans	10p15.1	6390450	G|A	Intergenic
rs947474	HLA-DPB1	1.26e-05	PMA	Ram	trans	10p15.1	6390450	G|A	Intergenic
rs947474	CCDC109A	1.34e-05	PMA	Ram	trans	10p15.1	6390450	G|A	Intergenic
rs947474	-	1.51e-05	PMA	Ram	trans	10p15.1	6390450	G|A	Intergenic
rs947474	IL21R	1.67e-05	PMA	Ram	trans	10p15.1	6390450	G|A	Intergenic
rs947474	MAPK1	1.86e-05	PMA	Ram	trans	10p15.1	6390450	G|A	Intergenic
rs947474	P2RY8	2.54e-05	PMA	Ram	trans	10p15.1	6390450	G|A	Intergenic
rs947474	LOC728556	4.67e-07	CD8	Ram	trans	10p15.1	6390450	G|A	Intergenic
rs947474	EIF5B	2.31e-06	CD8	Ram	trans	10p15.1	6390450	G|A	Intergenic
rs11258747	PFKFB3	4.01e-05	IFN	FairFax	cis	10p15.1	6472891	G|T	PRKCQ
rs11258747	PFKFB3	7.05e-05	IFN	FairFax	cis	10p15.1	6472891	G|T	PRKCQ
rs11258747	PFKFB3	7.33e-05	IFN	FairFax	cis	10p15.1	6472891	G|T	PRKCQ
rs11258747	PFKFB3	0.000199943	IFN	FairFax	cis	10p15.1	6472891	G|T	PRKCQ
rs11258747	PFKFB3	0.000939036	LPS2	FairFax	cis	10p15.1	6472891	G|T	PRKCQ
rs11258747	PFKFB3	0.00200278	LPS2	FairFax	cis	10p15.1	6472891	G|T	PRKCQ
rs11258747	PFKFB3	0.0041603	LPS2	FairFax	cis	10p15.1	6472891	G|T	PRKCQ
rs11258747	PFKFB3	0.00568951	LPS2	FairFax	cis	10p15.1	6472891	G|T	PRKCQ
rs11258747	PFKFB3	0.00807028	LPS24	FairFax	cis	10p15.1	6472891	G|T	PRKCQ
rs11258747	PRKAR1B	3.91e-06	EBV-rest	Ram	trans	10p15.1	6472891	G|T	PRKCQ
rs11258747	CENPQ	8.51e-06	EBV-rest	Ram	trans	10p15.1	6472891	G|T	PRKCQ
rs11258747	LOC645487	9.01e-06	EBV-rest	Ram	trans	10p15.1	6472891	G|T	PRKCQ
rs11258747	HERC2P4	1.39e-05	EBV-rest	Ram	trans	10p15.1	6472891	G|T	PRKCQ
rs11258747	PRKAR1B	5.41e-06	PMA	Ram	trans	10p15.1	6472891	G|T	PRKCQ
rs11258747	PTPRK	1.06e-05	PMA	Ram	trans	10p15.1	6472891	G|T	PRKCQ
rs11258747	COMMD2	1.12e-05	PMA	Ram	trans	10p15.1	6472891	G|T	PRKCQ
rs11258747	-	1.15e-05	PMA	Ram	trans	10p15.1	6472891	G|T	PRKCQ
rs11258747	BIRC3	1.28e-05	PMA	Ram	trans	10p15.1	6472891	G|T	PRKCQ
rs11258747	PLXDC2	1.34e-05	PMA	Ram	trans	10p15.1	6472891	G|T	PRKCQ
rs11258747	TNFRSF11A	1.46e-05	PMA	Ram	trans	10p15.1	6472891	G|T	PRKCQ
rs11258747	DDX23	1.56e-05	PMA	Ram	trans	10p15.1	6472891	G|T	PRKCQ
rs11258747	GDF15	1.88e-05	PMA	Ram	trans	10p15.1	6472891	G|T	PRKCQ
rs11258747	FLJ20273	2.11e-05	PMA	Ram	trans	10p15.1	6472891	G|T	PRKCQ
rs11258747	SNHG5	2.46e-05	PMA	Ram	trans	10p15.1	6472891	G|T	PRKCQ
rs11258747	TAZ	5.52e-07	CD4	Ram	trans	10p15.1	6472891	G|T	PRKCQ
rs11258747	HS.154948	8.54e-07	CD4	Ram	trans	10p15.1	6472891	G|T	PRKCQ
rs11258747	LOC646486	1.26e-06	CD4	Ram	trans	10p15.1	6472891	G|T	PRKCQ
rs722988	ITGB1	2.93e-05	CD8	Ram	cis	10p11.22	33426147	T|C	Intergenic
rs722988	GPR133	5.23e-06	EBV-rest	Ram	trans	10p11.22	33426147	T|C	Intergenic
rs722988	GARNL3	2.42e-06	PMA	Ram	trans	10p11.22	33426147	T|C	Intergenic
rs722988	C20orf94	4.35e-06	PMA	Ram	trans	10p11.22	33426147	T|C	Intergenic
rs722988	DDX17	7.28e-06	PMA	Ram	trans	10p11.22	33426147	T|C	Intergenic
rs722988	C15orf57	7.39e-06	PMA	Ram	trans	10p11.22	33426147	T|C	Intergenic
rs722988	RBPJ	9.53e-06	PMA	Ram	trans	10p11.22	33426147	T|C	Intergenic
rs722988	ACO1	1.32e-05	PMA	Ram	trans	10p11.22	33426147	T|C	Intergenic
rs722988	-	1.68e-05	PMA	Ram	trans	10p11.22	33426147	T|C	Intergenic
rs722988	IFI27L1	2.55e-05	PMA	Ram	trans	10p11.22	33426147	T|C	Intergenic
rs722988	TBX6	2.06e-06	CD8	Ram	trans	10p11.22	33426147	T|C	Intergenic
rs10509540	C10orf59	1.14e-06	Blood	Westra	cis	10q23.31	90023033	T|C	Intergenic
rs10509540	C10ORF59	2.69e-06	CD4	Ram	cis	10q23.31	90023033	T|C	Intergenic
rs10509540	C10ORF59	1.52e-05	Naive	FairFax	cis	10q23.31	90023033	T|C	Intergenic
rs10509540	C10ORF59	3.86e-05	LPS24	FairFax	cis	10q23.31	90023033	T|C	Intergenic
rs10509540	PTEN	5.36e-05	CD8	Ram	cis	10q23.31	90023033	T|C	Intergenic
rs10509540	SNTB1	4.58e-06	EBV-rest	Ram	trans	10q23.31	90023033	T|C	Intergenic
rs10509540	DNTTIP2	1.37e-05	EBV-rest	Ram	trans	10q23.31	90023033	T|C	Intergenic
rs10509540	SNTB1	1.42e-05	PMA	Ram	trans	10q23.31	90023033	T|C	Intergenic
rs10509540	GPR6	1.69e-05	PMA	Ram	trans	10q23.31	90023033	T|C	Intergenic
rs10509540	CDC2L5	2.22e-05	PMA	Ram	trans	10q23.31	90023033	T|C	Intergenic
rs10509540	SMAD7	8e-07	CD4	Ram	trans	10q23.31	90023033	T|C	Intergenic
rs10509540	POLD3	2.31e-06	CD4	Ram	trans	10q23.31	90023033	T|C	Intergenic
rs10509540	HCP5	2.31e-07	CD8	Ram	trans	10q23.31	90023033	T|C	Intergenic
rs10509540	MTIF3	9.07e-07	CD8	Ram	trans	10q23.31	90023033	T|C	Intergenic
rs10509540	ZNF259	1.17e-06	CD8	Ram	trans	10q23.31	90023033	T|C	Intergenic
rs10509540	SNRPD3	3.43e-06	CD8	Ram	trans	10q23.31	90023033	T|C	Intergenic
rs10509540	PCDHGA2,PCDHGA3	1.34e-05	Blood	Westra	trans	10q23.31	90023033	T|C	Intergenic
rs7928968	LOC440926	7.9e-07	EBV-rest	Ram	trans	11p15.5	2050299	A|T	Intergenic
rs7928968	C7orf40	1.95e-06	EBV-rest	Ram	trans	11p15.5	2050299	A|T	Intergenic
rs7928968	GCET2	1.96e-06	EBV-rest	Ram	trans	11p15.5	2050299	A|T	Intergenic
rs7928968	NUCKS1	3.01e-06	EBV-rest	Ram	trans	11p15.5	2050299	A|T	Intergenic
rs7928968	FNBP1	3.26e-06	EBV-rest	Ram	trans	11p15.5	2050299	A|T	Intergenic
rs7928968	PACS1	3.33e-06	EBV-rest	Ram	trans	11p15.5	2050299	A|T	Intergenic
rs7928968	MSX1	3.65e-06	EBV-rest	Ram	trans	11p15.5	2050299	A|T	Intergenic
rs7928968	MRPL22	4.59e-06	EBV-rest	Ram	trans	11p15.5	2050299	A|T	Intergenic
rs7928968	SNHG1	4.94e-06	EBV-rest	Ram	trans	11p15.5	2050299	A|T	Intergenic
rs7928968	WNT3	5.28e-06	EBV-rest	Ram	trans	11p15.5	2050299	A|T	Intergenic
rs7928968	MVD	5.64e-06	EBV-rest	Ram	trans	11p15.5	2050299	A|T	Intergenic
rs7928968	-	6.28e-06	EBV-rest	Ram	trans	11p15.5	2050299	A|T	Intergenic
rs7928968	MYOCD	6.58e-06	EBV-rest	Ram	trans	11p15.5	2050299	A|T	Intergenic
rs7928968	LOC100130301	6.62e-06	EBV-rest	Ram	trans	11p15.5	2050299	A|T	Intergenic
rs7928968	MCOLN2	7e-06	EBV-rest	Ram	trans	11p15.5	2050299	A|T	Intergenic
rs7928968	KCNMB3	7.15e-06	EBV-rest	Ram	trans	11p15.5	2050299	A|T	Intergenic
rs7928968	ANKRD24	7.83e-06	EBV-rest	Ram	trans	11p15.5	2050299	A|T	Intergenic
rs7928968	P4HA2	9.59e-06	EBV-rest	Ram	trans	11p15.5	2050299	A|T	Intergenic
rs7928968	SLC44A1	1.15e-05	EBV-rest	Ram	trans	11p15.5	2050299	A|T	Intergenic
rs7928968	PRPF18	1.31e-05	EBV-rest	Ram	trans	11p15.5	2050299	A|T	Intergenic
rs7928968	SON	1.36e-05	EBV-rest	Ram	trans	11p15.5	2050299	A|T	Intergenic
rs7928968	P4HA2	1.42e-05	EBV-rest	Ram	trans	11p15.5	2050299	A|T	Intergenic
rs7928968	GUCY1A3	1.71e-05	EBV-rest	Ram	trans	11p15.5	2050299	A|T	Intergenic
rs7928968	TLCD1	3.08e-07	PMA	Ram	trans	11p15.5	2050299	A|T	Intergenic
rs7928968	REL	1.2e-06	PMA	Ram	trans	11p15.5	2050299	A|T	Intergenic
rs7928968	LOC440926	2.75e-06	PMA	Ram	trans	11p15.5	2050299	A|T	Intergenic
rs7928968	LOC387895	2.98e-06	PMA	Ram	trans	11p15.5	2050299	A|T	Intergenic
rs7928968	CAPNS1	5.57e-06	PMA	Ram	trans	11p15.5	2050299	A|T	Intergenic
rs7928968	-	6.44e-06	PMA	Ram	trans	11p15.5	2050299	A|T	Intergenic
rs7928968	ARHGEF7	8.67e-06	PMA	Ram	trans	11p15.5	2050299	A|T	Intergenic
rs7928968	FTO	9.1e-06	PMA	Ram	trans	11p15.5	2050299	A|T	Intergenic
rs7928968	HYAL3	1.38e-05	PMA	Ram	trans	11p15.5	2050299	A|T	Intergenic
rs7928968	MSX1	2.64e-05	PMA	Ram	trans	11p15.5	2050299	A|T	Intergenic
rs7928968	BLZF1	2.64e-05	PMA	Ram	trans	11p15.5	2050299	A|T	Intergenic
rs7928968	MNT	1.6e-07	CD4	Ram	trans	11p15.5	2050299	A|T	Intergenic
rs7928968	PRELID1	1.17e-06	CD4	Ram	trans	11p15.5	2050299	A|T	Intergenic
rs7928968	NRD1	2.07e-07	CD8	Ram	trans	11p15.5	2050299	A|T	Intergenic
rs7928968	ANKS1A	1.13e-06	CD8	Ram	trans	11p15.5	2050299	A|T	Intergenic
rs7928968	LOC401588	2.08e-06	CD8	Ram	trans	11p15.5	2050299	A|T	Intergenic
rs7928968	HERC4	3.15e-06	CD8	Ram	trans	11p15.5	2050299	A|T	Intergenic
rs7928968	MCM4	2.43e-06	CD8	Ram	trans	11p15.5	2050299	A|T	Intergenic
rs3842727	NLRP2	1.63e-07	EBV-rest	Ram	trans	11p15.5	2184848	G|T	TH
rs3842727	ARHGAP17	1.1e-06	EBV-rest	Ram	trans	11p15.5	2184848	G|T	TH
rs3842727	CIDEB	2.42e-06	EBV-rest	Ram	trans	11p15.5	2184848	G|T	TH
rs3842727	TUBB2A	2.86e-06	EBV-rest	Ram	trans	11p15.5	2184848	G|T	TH
rs3842727	CST3	1.02e-05	EBV-rest	Ram	trans	11p15.5	2184848	G|T	TH
rs3842727	TRIP6	1.06e-05	EBV-rest	Ram	trans	11p15.5	2184848	G|T	TH
rs3842727	ID2	1.43e-05	EBV-rest	Ram	trans	11p15.5	2184848	G|T	TH
rs3842727	JUN	1.61e-05	EBV-rest	Ram	trans	11p15.5	2184848	G|T	TH
rs3842727	ID2	1.72e-10	PMA	Ram	trans	11p15.5	2184848	G|T	TH
rs3842727	ID2	8.89e-10	PMA	Ram	trans	11p15.5	2184848	G|T	TH
rs3842727	CD276	5.74e-09	PMA	Ram	trans	11p15.5	2184848	G|T	TH
rs3842727	LOC347292	1.57e-07	PMA	Ram	trans	11p15.5	2184848	G|T	TH
rs3842727	TRIP6	7.21e-07	PMA	Ram	trans	11p15.5	2184848	G|T	TH
rs3842727	LOC100130835	8.84e-07	PMA	Ram	trans	11p15.5	2184848	G|T	TH
rs3842727	NLRP2	1.1e-06	PMA	Ram	trans	11p15.5	2184848	G|T	TH
rs3842727	C9orf23	3.53e-06	PMA	Ram	trans	11p15.5	2184848	G|T	TH
rs3842727	PTGR1	3.61e-06	PMA	Ram	trans	11p15.5	2184848	G|T	TH
rs3842727	BCAR3	3.74e-06	PMA	Ram	trans	11p15.5	2184848	G|T	TH
rs3842727	LOC645489	3.93e-06	PMA	Ram	trans	11p15.5	2184848	G|T	TH
rs3842727	C9orf23	5.09e-06	PMA	Ram	trans	11p15.5	2184848	G|T	TH
rs3842727	SHROOM3	6.64e-06	PMA	Ram	trans	11p15.5	2184848	G|T	TH
rs3842727	SERPINE2	7.11e-06	PMA	Ram	trans	11p15.5	2184848	G|T	TH
rs3842727	CUL5	9.31e-06	PMA	Ram	trans	11p15.5	2184848	G|T	TH
rs3842727	FAM18B	1.47e-05	PMA	Ram	trans	11p15.5	2184848	G|T	TH
rs3842727	MGC87042	1.56e-05	PMA	Ram	trans	11p15.5	2184848	G|T	TH
rs3842727	HBZ	1.68e-05	PMA	Ram	trans	11p15.5	2184848	G|T	TH
rs3842727	TPST2	1.86e-05	PMA	Ram	trans	11p15.5	2184848	G|T	TH
rs3842727	CCNA1	1.92e-05	PMA	Ram	trans	11p15.5	2184848	G|T	TH
rs3842727	SHRM	2.29e-05	PMA	Ram	trans	11p15.5	2184848	G|T	TH
rs3842727	ARHGAP17	2.5e-05	PMA	Ram	trans	11p15.5	2184848	G|T	TH
rs3842727	BTLA	2.54e-05	PMA	Ram	trans	11p15.5	2184848	G|T	TH
rs3842727	RRN3	2.6e-05	PMA	Ram	trans	11p15.5	2184848	G|T	TH
rs3842727	ID2	3.76e-07	PMA	Ram	trans	11p15.5	2184848	G|T	TH
rs3842727	LOC399715	2.11e-07	CD8	Ram	trans	11p15.5	2184848	G|T	TH
rs3842727	SLC11A1	2.95e-07	CD8	Ram	trans	11p15.5	2184848	G|T	TH
rs3842727	SPA17	3.81e-07	CD8	Ram	trans	11p15.5	2184848	G|T	TH
rs3842727	CLYBL	4.2e-07	CD8	Ram	trans	11p15.5	2184848	G|T	TH
rs3842727	FOXB1	4.52e-07	CD8	Ram	trans	11p15.5	2184848	G|T	TH
rs3842727	MIR302C	1.06e-06	CD8	Ram	trans	11p15.5	2184848	G|T	TH
rs3842727	SLC15A3	1.1e-06	CD8	Ram	trans	11p15.5	2184848	G|T	TH
rs3842727	MAFF	1.21e-06	CD8	Ram	trans	11p15.5	2184848	G|T	TH
rs3842727	RHBDD3	1.46e-06	CD8	Ram	trans	11p15.5	2184848	G|T	TH
rs3842727	AQP9	2.79e-06	CD8	Ram	trans	11p15.5	2184848	G|T	TH
rs3842727	H2AFY	2.89e-06	CD8	Ram	trans	11p15.5	2184848	G|T	TH
rs7111341	ASCL2	4.32e-09	Naive	FairFax	cis	11p15.5	2213166	C|T	Intergenic
rs7111341	ASCL2	1.32e-08	Naive	FairFax	cis	11p15.5	2213166	C|T	Intergenic
rs7111341	C11ORF21	1.25e-06	Naive	FairFax	cis	11p15.5	2213166	C|T	Intergenic
rs7111341	TSPAN32	3.21e-09	Naive	FairFax	cis	11p15.5	2213166	C|T	Intergenic
rs7111341	TSPAN32	2.34e-08	Naive	FairFax	cis	11p15.5	2213166	C|T	Intergenic
rs7111341	TSPAN32	1.33e-07	Naive	FairFax	cis	11p15.5	2213166	C|T	Intergenic
rs7111341	TSPAN32	0.000693913	IFN	FairFax	cis	11p15.5	2213166	C|T	Intergenic
rs7111341	TSPAN32	0.00168027	Blood	Westra	cis	11p15.5	2213166	C|T	Intergenic
rs7111341	TSPAN32	0.00188752	IFN	FairFax	cis	11p15.5	2213166	C|T	Intergenic
rs7111341	TSPAN32	0.00200756	LPS2	FairFax	cis	11p15.5	2213166	C|T	Intergenic
rs7111341	TSPAN32	0.00421253	IFN	FairFax	cis	11p15.5	2213166	C|T	Intergenic
rs7111341	ADH5	2.27e-06	EBV-rest	Ram	trans	11p15.5	2213166	C|T	Intergenic
rs7111341	TUBB4Q	6.47e-07	PMA	Ram	trans	11p15.5	2213166	C|T	Intergenic
rs7111341	G3BP1	6.79e-07	PMA	Ram	trans	11p15.5	2213166	C|T	Intergenic
rs7111341	NOP56	1.39e-06	PMA	Ram	trans	11p15.5	2213166	C|T	Intergenic
rs7111341	PABPC3	1.8e-06	PMA	Ram	trans	11p15.5	2213166	C|T	Intergenic
rs7111341	LOC643287	2.39e-06	PMA	Ram	trans	11p15.5	2213166	C|T	Intergenic
rs7111341	LOC728973	4.03e-06	PMA	Ram	trans	11p15.5	2213166	C|T	Intergenic
rs7111341	SLC35B4	4.48e-06	PMA	Ram	trans	11p15.5	2213166	C|T	Intergenic
rs7111341	XYLT1	5.07e-06	PMA	Ram	trans	11p15.5	2213166	C|T	Intergenic
rs7111341	DEGS1	5.17e-06	PMA	Ram	trans	11p15.5	2213166	C|T	Intergenic
rs7111341	CD58	7.01e-06	PMA	Ram	trans	11p15.5	2213166	C|T	Intergenic
rs7111341	SLC9A3	1.04e-05	PMA	Ram	trans	11p15.5	2213166	C|T	Intergenic
rs7111341	LOC646197	1.11e-05	PMA	Ram	trans	11p15.5	2213166	C|T	Intergenic
rs7111341	LAMP3	1.17e-05	PMA	Ram	trans	11p15.5	2213166	C|T	Intergenic
rs7111341	CPSF2	1.29e-05	PMA	Ram	trans	11p15.5	2213166	C|T	Intergenic
rs7111341	MCEE	1.73e-05	PMA	Ram	trans	11p15.5	2213166	C|T	Intergenic
rs7111341	LCOR	1.79e-05	PMA	Ram	trans	11p15.5	2213166	C|T	Intergenic
rs7111341	LAMP3	1.93e-05	PMA	Ram	trans	11p15.5	2213166	C|T	Intergenic
rs7111341	HMGB2	2.16e-05	PMA	Ram	trans	11p15.5	2213166	C|T	Intergenic
rs7111341	C12orf26	2.59e-05	PMA	Ram	trans	11p15.5	2213166	C|T	Intergenic
rs7111341	FCGR2A	6.63e-08	CD4	Ram	trans	11p15.5	2213166	C|T	Intergenic
rs7111341	SIGLEC14	2.47e-07	CD4	Ram	trans	11p15.5	2213166	C|T	Intergenic
rs7111341	LYN	3.69e-07	CD4	Ram	trans	11p15.5	2213166	C|T	Intergenic
rs7111341	AQP9	9.86e-07	CD4	Ram	trans	11p15.5	2213166	C|T	Intergenic
rs7111341	HCK	1.62e-06	CD4	Ram	trans	11p15.5	2213166	C|T	Intergenic
rs7111341	LOC100132567	3.56e-07	CD8	Ram	trans	11p15.5	2213166	C|T	Intergenic
rs7111341	ODZ4	3.72e-07	CD8	Ram	trans	11p15.5	2213166	C|T	Intergenic
rs7111341	OR5B3	8.38e-07	CD8	Ram	trans	11p15.5	2213166	C|T	Intergenic
rs7111341	HEBP2	1.19e-06	CD8	Ram	trans	11p15.5	2213166	C|T	Intergenic
rs7111341	TMEM80	1.64e-06	CD8	Ram	trans	11p15.5	2213166	C|T	Intergenic
rs3764021	CD69	3.88e-05	Blood	Westra	cis	12p13.31	9833628	C|T	CLEC2D
rs3764021	CD69	0.000234572	EBV-rest	Ram	cis	12p13.31	9833628	C|T	CLEC2D
rs3764021	CD69	0.00025125	EBV-rest	Ram	cis	12p13.31	9833628	C|T	CLEC2D
rs3764021	CD69	0.000343979	EBV-rest	Ram	cis	12p13.31	9833628	C|T	CLEC2D
rs3764021	CD69	0.0010725	IFN	FairFax	cis	12p13.31	9833628	C|T	CLEC2D
rs3764021	CLEC2B	3.63e-12	Blood	Westra	cis	12p13.31	9833628	C|T	CLEC2D
rs3764021	CLEC2B	8.11e-05	EBV-rest	Ram	cis	12p13.31	9833628	C|T	CLEC2D
rs3764021	CLEC2B	0.000457302	Naive	FairFax	cis	12p13.31	9833628	C|T	CLEC2D
rs3764021	CLEC2B	0.00753929	IFN	FairFax	cis	12p13.31	9833628	C|T	CLEC2D
rs3764021	CLEC2D	5.27e-15	Blood	Westra	cis	12p13.31	9833628	C|T	CLEC2D
rs3764021	CLEC2D	2.51e-10	PMA	Ram	cis	12p13.31	9833628	C|T	CLEC2D
rs3764021	CLEC2D	1.19e-07	EBV-rest	Ram	cis	12p13.31	9833628	C|T	CLEC2D
rs3764021	CLEC2D	9.88e-07	EBV-rest	Ram	cis	12p13.31	9833628	C|T	CLEC2D
rs3764021	CLEC2D	1.23e-06	Blood	Westra	cis	12p13.31	9833628	C|T	CLEC2D
rs3764021	CLEC2D	1.47e-06	PMA	Ram	cis	12p13.31	9833628	C|T	CLEC2D
rs3764021	CLEC2D	2.11e-06	Blood	Westra	cis	12p13.31	9833628	C|T	CLEC2D
rs3764021	CLEC2D	7.4e-06	bcell	FairFax (2012)	cis	12p13.31	9833628	C|T	CLEC2D
rs3764021	CLEC2D	2.27e-05	EBV-rest	Ram	cis	12p13.31	9833628	C|T	CLEC2D
rs3764021	CLEC2D	0.000135334	EBV-rest	Ram	cis	12p13.31	9833628	C|T	CLEC2D
rs3764021	CLEC2D	0.000571656	PMA	Ram	cis	12p13.31	9833628	C|T	CLEC2D
rs3764021	CLECL1	3.5e-147	Blood	Westra	cis	12p13.31	9833628	C|T	CLEC2D
rs3764021	CLECL1	1.03e-84	Naive	FairFax	cis	12p13.31	9833628	C|T	CLEC2D
rs3764021	CLECL1	3.47e-73	IFN	FairFax	cis	12p13.31	9833628	C|T	CLEC2D
rs3764021	CLECL1	6.64e-56	mono	FairFax (2012)	cis	12p13.31	9833628	C|T	CLEC2D
rs3764021	CLECL1	1.42e-25	LPS24	FairFax	cis	12p13.31	9833628	C|T	CLEC2D
rs3764021	CLECL1	2.88e-25	LPS2	FairFax	cis	12p13.31	9833628	C|T	CLEC2D
rs3764021	CLECL1	3.49e-13	Monocyte	Peters	cis	12p13.31	9833628	C|T	CLEC2D
rs3764021	CLECL1	4.62e-12	Monocyte	Peters	cis	12p13.31	9833628	C|T	CLEC2D
rs3764021	CLECL1	2.4e-11	Monocyte	Peters	cis	12p13.31	9833628	C|T	CLEC2D
rs3764021	CLECL1	3.51e-08	bcell	FairFax (2012)	cis	12p13.31	9833628	C|T	CLEC2D
rs3764021	CLECL1	3.85e-06	CD8	Ram	cis	12p13.31	9833628	C|T	CLEC2D
rs3764021	CLECL1	6.44e-05	CD8	Peters	cis	12p13.31	9833628	C|T	CLEC2D
rs3764021	CLECL1	6.44e-05	CD8	Peters	cis	12p13.31	9833628	C|T	CLEC2D
rs3764021	CLECL1	6.44e-05	CD8	Peters	cis	12p13.31	9833628	C|T	CLEC2D
rs3764021	CLECL1	0.00138175	CD4	Peters	cis	12p13.31	9833628	C|T	CLEC2D
rs3764021	CLECL1	0.00138175	CD4	Peters	cis	12p13.31	9833628	C|T	CLEC2D
rs3764021	CLECL1	0.00138175	CD4	Peters	cis	12p13.31	9833628	C|T	CLEC2D
rs3764021	MEIS2	8.98e-07	EBV-rest	Ram	trans	12p13.31	9833628	C|T	CLEC2D
rs3764021	SNAPC3	2.19e-06	EBV-rest	Ram	trans	12p13.31	9833628	C|T	CLEC2D
rs3764021	C1orf144	3.55e-06	EBV-rest	Ram	trans	12p13.31	9833628	C|T	CLEC2D
rs3764021	MYO1D	3.58e-06	EBV-rest	Ram	trans	12p13.31	9833628	C|T	CLEC2D
rs3764021	IL23R	9.19e-06	EBV-rest	Ram	trans	12p13.31	9833628	C|T	CLEC2D
rs3764021	LUZP1	1.12e-05	EBV-rest	Ram	trans	12p13.31	9833628	C|T	CLEC2D
rs3764021	SYNE2	3.71e-08	PMA	Ram	trans	12p13.31	9833628	C|T	CLEC2D
rs3764021	SPDYA	6.27e-07	PMA	Ram	trans	12p13.31	9833628	C|T	CLEC2D
rs3764021	SNORA24	7.06e-07	PMA	Ram	trans	12p13.31	9833628	C|T	CLEC2D
rs3764021	TNFRSF18	9.05e-07	PMA	Ram	trans	12p13.31	9833628	C|T	CLEC2D
rs3764021	DIP2B	9.46e-07	PMA	Ram	trans	12p13.31	9833628	C|T	CLEC2D
rs3764021	MYO1D	1.05e-06	PMA	Ram	trans	12p13.31	9833628	C|T	CLEC2D
rs3764021	NFATC1	1.24e-06	PMA	Ram	trans	12p13.31	9833628	C|T	CLEC2D
rs3764021	DIP2B	1.29e-06	PMA	Ram	trans	12p13.31	9833628	C|T	CLEC2D
rs3764021	UBE2E3	1.51e-06	PMA	Ram	trans	12p13.31	9833628	C|T	CLEC2D
rs3764021	MEIS2	3.47e-06	PMA	Ram	trans	12p13.31	9833628	C|T	CLEC2D
rs3764021	-	9.01e-06	PMA	Ram	trans	12p13.31	9833628	C|T	CLEC2D
rs3764021	IL23R	9.28e-06	PMA	Ram	trans	12p13.31	9833628	C|T	CLEC2D
rs3764021	C1orf25	1.18e-05	PMA	Ram	trans	12p13.31	9833628	C|T	CLEC2D
rs3764021	COCH	1.3e-05	PMA	Ram	trans	12p13.31	9833628	C|T	CLEC2D
rs3764021	MFSD6	1.33e-05	PMA	Ram	trans	12p13.31	9833628	C|T	CLEC2D
rs3764021	ACO1	1.46e-05	PMA	Ram	trans	12p13.31	9833628	C|T	CLEC2D
rs3764021	ZNF827	1.46e-05	PMA	Ram	trans	12p13.31	9833628	C|T	CLEC2D
rs3764021	GPATCH4	1.71e-05	PMA	Ram	trans	12p13.31	9833628	C|T	CLEC2D
rs3764021	STAT4	2.17e-05	PMA	Ram	trans	12p13.31	9833628	C|T	CLEC2D
rs3764021	MTSS1	2.53e-05	PMA	Ram	trans	12p13.31	9833628	C|T	CLEC2D
rs3764021	CDKN2A	2.66e-05	PMA	Ram	trans	12p13.31	9833628	C|T	CLEC2D
rs3764021	YIPF4	3.1e-06	CD8	Ram	trans	12p13.31	9833628	C|T	CLEC2D
rs3764021	KIR2DL5A	3.13e-06	CD8	Ram	trans	12p13.31	9833628	C|T	CLEC2D
rs10466829	CD69	6.17e-05	EBV-rest	Ram	cis	12p13.31	9876091	G|A	CLECL1
rs10466829	CD69	0.000122796	EBV-rest	Ram	cis	12p13.31	9876091	G|A	CLECL1
rs10466829	CD69	0.000158729	Blood	Westra	cis	12p13.31	9876091	G|A	CLECL1
rs10466829	CD69	0.000214659	EBV-rest	Ram	cis	12p13.31	9876091	G|A	CLECL1
rs10466829	CD69	0.000290959	EBV-rest	Ram	cis	12p13.31	9876091	G|A	CLECL1
rs10466829	CLEC1A	0.000185987	CD4	Ram	cis	12p13.31	9876091	G|A	CLECL1
rs10466829	CLEC2B	2.83e-17	Blood	Westra	cis	12p13.31	9876091	G|A	CLECL1
rs10466829	CLEC2B	0.000126811	EBV-rest	Ram	cis	12p13.31	9876091	G|A	CLECL1
rs10466829	CLEC2D	8.66e-12	Blood	Westra	cis	12p13.31	9876091	G|A	CLECL1
rs10466829	CLEC2D	6.23e-08	PMA	Ram	cis	12p13.31	9876091	G|A	CLECL1
rs10466829	CLEC2D	1.28e-06	Blood	Westra	cis	12p13.31	9876091	G|A	CLECL1
rs10466829	CLEC2D	7.67e-06	Blood	Westra	cis	12p13.31	9876091	G|A	CLECL1
rs10466829	CLEC2D	1.06e-05	EBV-rest	Ram	cis	12p13.31	9876091	G|A	CLECL1
rs10466829	CLEC2D	4.1e-05	PMA	Ram	cis	12p13.31	9876091	G|A	CLECL1
rs10466829	CLEC2D	4.42e-05	EBV-rest	Ram	cis	12p13.31	9876091	G|A	CLECL1
rs10466829	CLECL1	1.12e-178	Blood	Westra	cis	12p13.31	9876091	G|A	CLECL1
rs10466829	CLECL1	3.49e-13	Monocyte	Peters	cis	12p13.31	9876091	G|A	CLECL1
rs10466829	CLECL1	6.91e-13	CD8	Ram	cis	12p13.31	9876091	G|A	CLECL1
rs10466829	CLECL1	4.62e-12	Monocyte	Peters	cis	12p13.31	9876091	G|A	CLECL1
rs10466829	CLECL1	2.4e-11	Monocyte	Peters	cis	12p13.31	9876091	G|A	CLECL1
rs10466829	CLECL1	4.07e-09	CD8	Ram	cis	12p13.31	9876091	G|A	CLECL1
rs10466829	CLECL1	1e-07	CD4	Ram	cis	12p13.31	9876091	G|A	CLECL1
rs10466829	DDX12	0.000207563	EBV-rest	Ram	cis	12p13.31	9876091	G|A	CLECL1
rs10466829	NFIB	1.98e-06	EBV-rest	Ram	trans	12p13.31	9876091	G|A	CLECL1
rs10466829	HDLBP	5.09e-06	EBV-rest	Ram	trans	12p13.31	9876091	G|A	CLECL1
rs10466829	C1orf144	5.74e-06	EBV-rest	Ram	trans	12p13.31	9876091	G|A	CLECL1
rs10466829	FOXO3	7.58e-06	EBV-rest	Ram	trans	12p13.31	9876091	G|A	CLECL1
rs10466829	MYO1D	1.24e-05	EBV-rest	Ram	trans	12p13.31	9876091	G|A	CLECL1
rs10466829	HYDIN	1.47e-05	EBV-rest	Ram	trans	12p13.31	9876091	G|A	CLECL1
rs10466829	SPDYA	1.52e-07	PMA	Ram	trans	12p13.31	9876091	G|A	CLECL1
rs10466829	COCH	2.46e-07	PMA	Ram	trans	12p13.31	9876091	G|A	CLECL1
rs10466829	SYNE2	4.88e-07	PMA	Ram	trans	12p13.31	9876091	G|A	CLECL1
rs10466829	NFATC1	4.96e-07	PMA	Ram	trans	12p13.31	9876091	G|A	CLECL1
rs10466829	SNORA24	5.43e-07	PMA	Ram	trans	12p13.31	9876091	G|A	CLECL1
rs10466829	DIP2B	1.52e-06	PMA	Ram	trans	12p13.31	9876091	G|A	CLECL1
rs10466829	UBE2E3	2.03e-06	PMA	Ram	trans	12p13.31	9876091	G|A	CLECL1
rs10466829	DIP2B	3.46e-06	PMA	Ram	trans	12p13.31	9876091	G|A	CLECL1
rs10466829	ACO1	5.99e-06	PMA	Ram	trans	12p13.31	9876091	G|A	CLECL1
rs10466829	C1orf25	6.6e-06	PMA	Ram	trans	12p13.31	9876091	G|A	CLECL1
rs10466829	MYO1D	6.95e-06	PMA	Ram	trans	12p13.31	9876091	G|A	CLECL1
rs10466829	RNASEN	9.66e-06	PMA	Ram	trans	12p13.31	9876091	G|A	CLECL1
rs10466829	STAT4	2.44e-05	PMA	Ram	trans	12p13.31	9876091	G|A	CLECL1
rs10466829	PUSL1	1.42e-07	CD8	Ram	trans	12p13.31	9876091	G|A	CLECL1
rs10466829	FLJ00312	1.98e-06	CD8	Ram	trans	12p13.31	9876091	G|A	CLECL1
rs10466829	DALRD3	1.99e-06	CD8	Ram	trans	12p13.31	9876091	G|A	CLECL1
rs10466829	LOC727924	3.07e-06	CD8	Ram	trans	12p13.31	9876091	G|A	CLECL1
rs10466829	COX6B1	4.67e-06	Blood	Westra	trans	12p13.31	9876091	G|A	CLECL1
rs10743823	CD69	6.16e-05	IFN	FairFax	cis	12p13.31	9881125	C|T	CLECL1
rs10743823	CD69	0.00093511	IFN	FairFax	cis	12p13.31	9881125	C|T	CLECL1
rs10743823	CLEC2B	0.000239202	Naive	FairFax	cis	12p13.31	9881125	C|T	CLECL1
rs10743823	CLEC2D	3.25e-06	bcell	FairFax (2012)	cis	12p13.31	9881125	C|T	CLECL1
rs10743823	CLECL1	2.61e-125	Naive	FairFax	cis	12p13.31	9881125	C|T	CLECL1
rs10743823	CLECL1	9.67e-103	IFN	FairFax	cis	12p13.31	9881125	C|T	CLECL1
rs10743823	CLECL1	1.79e-80	mono	FairFax (2012)	cis	12p13.31	9881125	C|T	CLECL1
rs10743823	CLECL1	3.19e-62	Naive	FairFax	cis	12p13.31	9881125	C|T	CLECL1
rs10743823	CLECL1	1.18e-60	IFN	FairFax	cis	12p13.31	9881125	C|T	CLECL1
rs10743823	CLECL1	5.67e-39	LPS24	FairFax	cis	12p13.31	9881125	C|T	CLECL1
rs10743823	CLECL1	1.46e-34	Baseline	Lee	cis	12p13.31	9881125	C|T	CLECL1
rs10743823	CLECL1	3.45e-34	LPS2	FairFax	cis	12p13.31	9881125	C|T	CLECL1
rs10743823	CLECL1	1.15e-33	IFNb	Lee	cis	12p13.31	9881125	C|T	CLECL1
rs10743823	CLECL1	8.9e-30	LPS2	FairFax	cis	12p13.31	9881125	C|T	CLECL1
rs10743823	CLECL1	2.71e-27	LPS24	FairFax	cis	12p13.31	9881125	C|T	CLECL1
rs10743823	CLECL1	1.63e-25	FLU	Lee	cis	12p13.31	9881125	C|T	CLECL1
rs10743823	CLECL1	2.01e-11	bcell	FairFax (2012)	cis	12p13.31	9881125	C|T	CLECL1
rs4763879	CD69	2.18e-06	Blood	Westra	cis	12p13.31	9910164	G|A	CD69
rs4763879	CD69	0.000480992	IFN	FairFax	cis	12p13.31	9910164	G|A	CD69
rs4763879	CD69	0.000605066	IFN	FairFax	cis	12p13.31	9910164	G|A	CD69
rs4763879	CLEC12A	2.01e-06	Blood	Westra	cis	12p13.31	9910164	G|A	CD69
rs4763879	CLEC12A	0.0002874	Blood	Westra	cis	12p13.31	9910164	G|A	CD69
rs4763879	CLEC2B	5.39e-32	Blood	Westra	cis	12p13.31	9910164	G|A	CD69
rs4763879	CLEC2B	3.88e-08	Naive	FairFax	cis	12p13.31	9910164	G|A	CD69
rs4763879	CLEC2B	4.63e-07	IFN	FairFax	cis	12p13.31	9910164	G|A	CD69
rs4763879	CLEC2B	9.29e-06	LPS2	FairFax	cis	12p13.31	9910164	G|A	CD69
rs4763879	CLEC2B	8.8e-05	EBV-rest	Ram	cis	12p13.31	9910164	G|A	CD69
rs4763879	CLEC2B	0.000101118	LPS24	FairFax	cis	12p13.31	9910164	G|A	CD69
rs4763879	CLEC2D	1.71e-15	Blood	Westra	cis	12p13.31	9910164	G|A	CD69
rs4763879	CLEC2D	6.94e-09	Blood	Westra	cis	12p13.31	9910164	G|A	CD69
rs4763879	CLEC2D	6.84e-07	Blood	Westra	cis	12p13.31	9910164	G|A	CD69
rs4763879	CLEC2D	1.54e-05	PMA	Ram	cis	12p13.31	9910164	G|A	CD69
rs4763879	CLEC2D	5.66e-05	EBV-rest	Ram	cis	12p13.31	9910164	G|A	CD69
rs4763879	CLEC2D	0.000111416	PMA	Ram	cis	12p13.31	9910164	G|A	CD69
rs4763879	CLEC2D	0.00019911	CD8	Ram	cis	12p13.31	9910164	G|A	CD69
rs4763879	CLEC2D	0.000743197	EBV-rest	Ram	cis	12p13.31	9910164	G|A	CD69
rs4763879	CLECL1	2.51e-63	Blood	Westra	cis	12p13.31	9910164	G|A	CD69
rs4763879	CLECL1	2.44e-27	Naive	FairFax	cis	12p13.31	9910164	G|A	CD69
rs4763879	CLECL1	5.34e-20	mono	FairFax (2012)	cis	12p13.31	9910164	G|A	CD69
rs4763879	CLECL1	3.22e-19	IFN	FairFax	cis	12p13.31	9910164	G|A	CD69
rs4763879	CLECL1	2.04e-06	LPS24	FairFax	cis	12p13.31	9910164	G|A	CD69
rs4763879	CLECL1	6.69e-06	LPS2	FairFax	cis	12p13.31	9910164	G|A	CD69
rs4763879	CLECL1	0.0002188	bcell	FairFax (2012)	cis	12p13.31	9910164	G|A	CD69
rs4763879	TRAF3IP2	1.3e-06	EBV-rest	Ram	trans	12p13.31	9910164	G|A	CD69
rs4763879	DUSP10	2.35e-06	EBV-rest	Ram	trans	12p13.31	9910164	G|A	CD69
rs4763879	PHF5A	2.92e-06	EBV-rest	Ram	trans	12p13.31	9910164	G|A	CD69
rs4763879	C8orf55	2.94e-06	EBV-rest	Ram	trans	12p13.31	9910164	G|A	CD69
rs4763879	PICK1	3.45e-06	EBV-rest	Ram	trans	12p13.31	9910164	G|A	CD69
rs4763879	CDC42BPA	4.82e-06	EBV-rest	Ram	trans	12p13.31	9910164	G|A	CD69
rs4763879	SLC26A6	5.39e-06	EBV-rest	Ram	trans	12p13.31	9910164	G|A	CD69
rs4763879	HAGH	6.25e-06	EBV-rest	Ram	trans	12p13.31	9910164	G|A	CD69
rs4763879	SERGEF	8.24e-06	EBV-rest	Ram	trans	12p13.31	9910164	G|A	CD69
rs4763879	SNORA24	9.41e-06	EBV-rest	Ram	trans	12p13.31	9910164	G|A	CD69
rs4763879	MEIS2	9.83e-06	EBV-rest	Ram	trans	12p13.31	9910164	G|A	CD69
rs4763879	MAPKAPK2	1.07e-05	EBV-rest	Ram	trans	12p13.31	9910164	G|A	CD69
rs4763879	NT5DC2	1.13e-05	EBV-rest	Ram	trans	12p13.31	9910164	G|A	CD69
rs4763879	C1orf144	1.24e-05	EBV-rest	Ram	trans	12p13.31	9910164	G|A	CD69
rs4763879	TAF6L	1.45e-05	EBV-rest	Ram	trans	12p13.31	9910164	G|A	CD69
rs4763879	SLC35A1	1.73e-05	EBV-rest	Ram	trans	12p13.31	9910164	G|A	CD69
rs4763879	DYRK3	1.8e-05	EBV-rest	Ram	trans	12p13.31	9910164	G|A	CD69
rs4763879	FAM58A	9.52e-07	PMA	Ram	trans	12p13.31	9910164	G|A	CD69
rs4763879	-	8.5e-06	PMA	Ram	trans	12p13.31	9910164	G|A	CD69
rs4763879	LTBR	1.03e-05	PMA	Ram	trans	12p13.31	9910164	G|A	CD69
rs4763879	MKI67	1.36e-05	PMA	Ram	trans	12p13.31	9910164	G|A	CD69
rs4763879	MLKL	1.57e-05	PMA	Ram	trans	12p13.31	9910164	G|A	CD69
rs4763879	PITPNC1	2.35e-05	PMA	Ram	trans	12p13.31	9910164	G|A	CD69
rs4763879	SLC2A4RG,ZBTB46	4.68e-06	Blood	Westra	trans	12p13.31	9910164	G|A	CD69
rs1701704	RP4-697K14.11	2.22e-15	Blood	Westra	trans	12q13.2	56412487	T|G	Intergenic
rs1701704	CCL5	4.19e-10	Blood	Westra	trans	12q13.2	56412487	T|G	Intergenic
rs1701704	AC136632.3-2	1.42e-09	Blood	Westra	trans	12q13.2	56412487	T|G	Intergenic
rs1701704	MIF,AP000350.4	2.08e-09	Blood	Westra	trans	12q13.2	56412487	T|G	Intergenic
rs1701704	DPF2	7.42e-09	Blood	Westra	trans	12q13.2	56412487	T|G	Intergenic
rs1701704	-	7.89e-09	Blood	Westra	trans	12q13.2	56412487	T|G	Intergenic
rs1701704	CRLF3	1.52e-08	Blood	Westra	trans	12q13.2	56412487	T|G	Intergenic
rs1701704	CEPT1	1.1e-07	Blood	Westra	trans	12q13.2	56412487	T|G	Intergenic
rs1701704	CDC42	1.4e-07	Blood	Westra	trans	12q13.2	56412487	T|G	Intergenic
rs1701704	-	2.34e-07	Blood	Westra	trans	12q13.2	56412487	T|G	Intergenic
rs1701704	MYC	6.34e-07	Blood	Westra	trans	12q13.2	56412487	T|G	Intergenic
rs1701704	SSR4	8.3e-07	Blood	Westra	trans	12q13.2	56412487	T|G	Intergenic
rs1701704	ARF5	1.36e-06	Blood	Westra	trans	12q13.2	56412487	T|G	Intergenic
rs1701704	CECR1	1.56e-06	Blood	Westra	trans	12q13.2	56412487	T|G	Intergenic
rs1701704	SLC39A11	2.07e-06	Blood	Westra	trans	12q13.2	56412487	T|G	Intergenic
rs1701704	ATP6V1G1	3.09e-06	Blood	Westra	trans	12q13.2	56412487	T|G	Intergenic
rs1701704	ITM2C	3.7e-06	Blood	Westra	trans	12q13.2	56412487	T|G	Intergenic
rs1701704	LBR	4.32e-06	Blood	Westra	trans	12q13.2	56412487	T|G	Intergenic
rs1701704	LYZ	4.7e-06	Blood	Westra	trans	12q13.2	56412487	T|G	Intergenic
rs1701704	SLC27A3	5e-06	Blood	Westra	trans	12q13.2	56412487	T|G	Intergenic
rs1701704	AES	5.2e-06	Blood	Westra	trans	12q13.2	56412487	T|G	Intergenic
rs1701704	GSTK1	6.34e-06	Blood	Westra	trans	12q13.2	56412487	T|G	Intergenic
rs1701704	CD52	6.48e-06	Blood	Westra	trans	12q13.2	56412487	T|G	Intergenic
rs1701704	CARKL	6.64e-06	Blood	Westra	trans	12q13.2	56412487	T|G	Intergenic
rs1701704	EDF1	7.18e-06	Blood	Westra	trans	12q13.2	56412487	T|G	Intergenic
rs1701704	ALDH3A2	7.33e-06	Blood	Westra	trans	12q13.2	56412487	T|G	Intergenic
rs1701704	ALDH3A2	7.71e-06	Blood	Westra	trans	12q13.2	56412487	T|G	Intergenic
rs1701704	TGFBR3	8.35e-06	Blood	Westra	trans	12q13.2	56412487	T|G	Intergenic
rs1701704	SNRPN,SNURF	9.19e-06	Blood	Westra	trans	12q13.2	56412487	T|G	Intergenic
rs1701704	RP4-604K5.1	9.48e-06	Blood	Westra	trans	12q13.2	56412487	T|G	Intergenic
rs1701704	SDCBP	9.55e-06	Blood	Westra	trans	12q13.2	56412487	T|G	Intergenic
rs1701704	NLRP3	1.04e-05	Blood	Westra	trans	12q13.2	56412487	T|G	Intergenic
rs1701704	CXCR4	1.2e-05	Blood	Westra	trans	12q13.2	56412487	T|G	Intergenic
rs1701704	MYO9B	1.25e-05	Blood	Westra	trans	12q13.2	56412487	T|G	Intergenic
rs1701704	C2orf78	1.27e-05	Blood	Westra	trans	12q13.2	56412487	T|G	Intergenic
rs1701704	CLIC1	1.34e-05	Blood	Westra	trans	12q13.2	56412487	T|G	Intergenic
rs705704	ATP5B	0.000175101	EBV-rest	Ram	cis	12q13.2	56435412	G|A	RPS26
rs705704	ATP5B	0.000533963	EBV-rest	Ram	cis	12q13.2	56435412	G|A	RPS26
rs705704	BLOC1S1	0.000164968	CD4	Ram	cis	12q13.2	56435412	G|A	RPS26
rs705704	CDK2	0.000668946	Blood	Westra	cis	12q13.2	56435412	G|A	RPS26
rs705704	ERBB3	1.34e-05	CD8	Ram	cis	12q13.2	56435412	G|A	RPS26
rs705704	ERBB3	0.000111429	CD8	Ram	cis	12q13.2	56435412	G|A	RPS26
rs705704	ERBB3	0.000658257	Blood	Westra	cis	12q13.2	56435412	G|A	RPS26
rs705704	ESYT1	0.000146168	PMA	Ram	cis	12q13.2	56435412	G|A	RPS26
rs705704	IKZF4	0.00125335	CD4	Peters	cis	12q13.2	56435412	G|A	RPS26
rs705704	IKZF4	0.00125335	CD4	Peters	cis	12q13.2	56435412	G|A	RPS26
rs705704	IKZF4	0.00125335	CD4	Peters	cis	12q13.2	56435412	G|A	RPS26
rs705704	IKZF4	0.00125335	CD4	Peters	cis	12q13.2	56435412	G|A	RPS26
rs705704	IKZF4	0.00125335	CD4	Peters	cis	12q13.2	56435412	G|A	RPS26
rs705704	IKZF4	0.00125335	CD4	Peters	cis	12q13.2	56435412	G|A	RPS26
rs705704	IKZF4	0.00125335	CD4	Peters	cis	12q13.2	56435412	G|A	RPS26
rs705704	IKZF4	0.00125335	CD4	Peters	cis	12q13.2	56435412	G|A	RPS26
rs705704	IKZF4	0.00125335	CD4	Peters	cis	12q13.2	56435412	G|A	RPS26
rs705704	IKZF4	0.00125335	CD4	Peters	cis	12q13.2	56435412	G|A	RPS26
rs705704	PA2G4	0.000233853	EBV-rest	Ram	cis	12q13.2	56435412	G|A	RPS26
rs705704	RAB5B	7.28e-10	LPS24	FairFax	cis	12q13.2	56435412	G|A	RPS26
rs705704	RAB5B	2.5e-07	LPS2	FairFax	cis	12q13.2	56435412	G|A	RPS26
rs705704	RAB5B	0.000537758	IFN	FairFax	cis	12q13.2	56435412	G|A	RPS26
rs705704	RNF41	0.00291844	Blood	Westra	cis	12q13.2	56435412	G|A	RPS26
rs705704	RPS26	3.34e-12	IFN	FairFax	cis	12q13.2	56435412	G|A	RPS26
rs705704	RPS26	0.000337845	LPS24	FairFax	cis	12q13.2	56435412	G|A	RPS26
rs705704	RPS26	0.00134503	Naive	FairFax	cis	12q13.2	56435412	G|A	RPS26
rs705704	RPS26	0.00372729	LPS2	FairFax	cis	12q13.2	56435412	G|A	RPS26
rs705704	STAT2	4.92e-05	PMA	Ram	cis	12q13.2	56435412	G|A	RPS26
rs705704	STAT2	0.00044257	EBV-rest	Ram	cis	12q13.2	56435412	G|A	RPS26
rs705704	SUOX	5.05e-16	Naive	FairFax	cis	12q13.2	56435412	G|A	RPS26
rs705704	SUOX	1.72e-12	CD4	Ram	cis	12q13.2	56435412	G|A	RPS26
rs705704	SUOX	1.73e-09	CD4	Ram	cis	12q13.2	56435412	G|A	RPS26
rs705704	SUOX	8.51e-08	LPS2	FairFax	cis	12q13.2	56435412	G|A	RPS26
rs705704	SUOX	1.63e-07	CD4	Ram	cis	12q13.2	56435412	G|A	RPS26
rs705704	SUOX	4.52e-07	CD4	Ram	cis	12q13.2	56435412	G|A	RPS26
rs705704	SUOX	4.04e-05	EBV-rest	Ram	cis	12q13.2	56435412	G|A	RPS26
rs705704	SUOX	5.97e-05	CD8	Ram	cis	12q13.2	56435412	G|A	RPS26
rs705704	SUOX	0.000125401	Naive	FairFax	cis	12q13.2	56435412	G|A	RPS26
rs705704	SUOX	0.000131313	EBV-rest	Ram	cis	12q13.2	56435412	G|A	RPS26
rs705704	SUOX	0.000206366	EBV-rest	Ram	cis	12q13.2	56435412	G|A	RPS26
rs705704	SUOX	0.000464028	EBV-rest	Ram	cis	12q13.2	56435412	G|A	RPS26
rs705704	SUOX	0.00591242	LPS24	FairFax	cis	12q13.2	56435412	G|A	RPS26
rs705704	LOC728823	3.54e-48	mono	FairFax (2012)	trans	12q13.2	56435412	G|A	RPS26
rs705704	IP6K2	2.44e-14	bcell	FairFax (2012)	trans	12q13.2	56435412	G|A	RPS26
rs705704	LOC389386	3.17e-41	bcell	FairFax (2012)	trans	12q13.2	56435412	G|A	RPS26
rs705704	LOC728823	1.98e-62	bcell	FairFax (2012)	trans	12q13.2	56435412	G|A	RPS26
rs705704	KCTD11	7.59e-11	Naive	FFSN	trans	12q13.2	56435412	G|A	RPS26
rs705704	LOC389386	5.98e-11	Naive	FFSN	trans	12q13.2	56435412	G|A	RPS26
rs705704	IP6K2	1.55e-11	LPS24	FFSN	trans	12q13.2	56435412	G|A	RPS26
rs705704	IP6K2	2.17e-08	IFN	FFSN	trans	12q13.2	56435412	G|A	RPS26
rs705704	IP6K2	2.32e-17	Naive	FFSN	trans	12q13.2	56435412	G|A	RPS26
rs705704	LOC728823	9.81e-49	LPS2	FFSN	trans	12q13.2	56435412	G|A	RPS26
rs705704	LOC728823	9.28e-52	LPS24	FFSN	trans	12q13.2	56435412	G|A	RPS26
rs705704	LOC728823	1.97e-64	IFN	FFSN	trans	12q13.2	56435412	G|A	RPS26
rs705704	LOC728823	2.47e-101	Naive	FFSN	trans	12q13.2	56435412	G|A	RPS26
rs705704	LOC728823	1.4e-45	EBV-rest	Ram	trans	12q13.2	56435412	G|A	RPS26
rs705704	LOC641768	2.69e-43	EBV-rest	Ram	trans	12q13.2	56435412	G|A	RPS26
rs705704	RPS26P10	4.09e-41	EBV-rest	Ram	trans	12q13.2	56435412	G|A	RPS26
rs705704	RPS26P11	1.61e-38	EBV-rest	Ram	trans	12q13.2	56435412	G|A	RPS26
rs705704	LOC100129552	1.46e-33	EBV-rest	Ram	trans	12q13.2	56435412	G|A	RPS26
rs705704	MIR130A	1.61e-29	EBV-rest	Ram	trans	12q13.2	56435412	G|A	RPS26
rs705704	IP6K2	2.57e-16	EBV-rest	Ram	trans	12q13.2	56435412	G|A	RPS26
rs705704	LOC728873	5.47e-10	EBV-rest	Ram	trans	12q13.2	56435412	G|A	RPS26
rs705704	HES4	3.34e-07	EBV-rest	Ram	trans	12q13.2	56435412	G|A	RPS26
rs705704	ZC3HAV1	7.26e-07	EBV-rest	Ram	trans	12q13.2	56435412	G|A	RPS26
rs705704	DUSP12	1.56e-06	EBV-rest	Ram	trans	12q13.2	56435412	G|A	RPS26
rs705704	MOAP1	2.42e-06	EBV-rest	Ram	trans	12q13.2	56435412	G|A	RPS26
rs705704	LOC169834	2.63e-06	EBV-rest	Ram	trans	12q13.2	56435412	G|A	RPS26
rs705704	KRT77	3.29e-06	EBV-rest	Ram	trans	12q13.2	56435412	G|A	RPS26
rs705704	LOC92659	9.21e-06	EBV-rest	Ram	trans	12q13.2	56435412	G|A	RPS26
rs705704	TNFRSF13C	9.51e-06	EBV-rest	Ram	trans	12q13.2	56435412	G|A	RPS26
rs705704	TUBB6	1.11e-05	EBV-rest	Ram	trans	12q13.2	56435412	G|A	RPS26
rs705704	IFIT2	1.16e-05	EBV-rest	Ram	trans	12q13.2	56435412	G|A	RPS26
rs705704	ATF3	1.33e-05	EBV-rest	Ram	trans	12q13.2	56435412	G|A	RPS26
rs705704	GTSF1	1.43e-05	EBV-rest	Ram	trans	12q13.2	56435412	G|A	RPS26
rs705704	MIR1471	1.46e-05	EBV-rest	Ram	trans	12q13.2	56435412	G|A	RPS26
rs705704	CSNK1G1	1.52e-05	EBV-rest	Ram	trans	12q13.2	56435412	G|A	RPS26
rs705704	LOC728823	7.89e-38	EBV-rest	Ram	trans	12q13.2	56435412	G|A	RPS26
rs705704	LOC641768	5.35e-32	EBV-rest	Ram	trans	12q13.2	56435412	G|A	RPS26
rs705704	RPS26P11	6.26e-32	EBV-rest	Ram	trans	12q13.2	56435412	G|A	RPS26
rs705704	RPS26P10	1.54e-30	EBV-rest	Ram	trans	12q13.2	56435412	G|A	RPS26
rs705704	LOC100129552	1.21e-28	EBV-rest	Ram	trans	12q13.2	56435412	G|A	RPS26
rs705704	MIR130A	3.01e-24	EBV-rest	Ram	trans	12q13.2	56435412	G|A	RPS26
rs705704	IP6K2	4.3e-15	EBV-rest	Ram	trans	12q13.2	56435412	G|A	RPS26
rs705704	RPS26P11	3.21e-43	PMA	Ram	trans	12q13.2	56435412	G|A	RPS26
rs705704	LOC728823	4.87e-42	PMA	Ram	trans	12q13.2	56435412	G|A	RPS26
rs705704	LOC641768	2.03e-37	PMA	Ram	trans	12q13.2	56435412	G|A	RPS26
rs705704	LOC100129552	8.26e-36	PMA	Ram	trans	12q13.2	56435412	G|A	RPS26
rs705704	RPS26P10	2.17e-34	PMA	Ram	trans	12q13.2	56435412	G|A	RPS26
rs705704	MIR130A	7.56e-24	PMA	Ram	trans	12q13.2	56435412	G|A	RPS26
rs705704	IP6K2	8.36e-11	PMA	Ram	trans	12q13.2	56435412	G|A	RPS26
rs705704	RTTN	6.28e-07	PMA	Ram	trans	12q13.2	56435412	G|A	RPS26
rs705704	OR2T5	1.21e-06	PMA	Ram	trans	12q13.2	56435412	G|A	RPS26
rs705704	BCL2L11	1.35e-06	PMA	Ram	trans	12q13.2	56435412	G|A	RPS26
rs705704	NRP2	3.7e-06	PMA	Ram	trans	12q13.2	56435412	G|A	RPS26
rs705704	ANAPC11	3.96e-06	PMA	Ram	trans	12q13.2	56435412	G|A	RPS26
rs705704	LOC92659	4.18e-06	PMA	Ram	trans	12q13.2	56435412	G|A	RPS26
rs705704	MIR1471	5.87e-06	PMA	Ram	trans	12q13.2	56435412	G|A	RPS26
rs705704	LOC727804	9.43e-06	PMA	Ram	trans	12q13.2	56435412	G|A	RPS26
rs705704	FJX1	1.08e-05	PMA	Ram	trans	12q13.2	56435412	G|A	RPS26
rs705704	C19orf53	1.52e-05	PMA	Ram	trans	12q13.2	56435412	G|A	RPS26
rs705704	HOXC4	1.68e-05	PMA	Ram	trans	12q13.2	56435412	G|A	RPS26
rs705704	ILDR2	1.72e-05	PMA	Ram	trans	12q13.2	56435412	G|A	RPS26
rs705704	LOC646786	1.78e-05	PMA	Ram	trans	12q13.2	56435412	G|A	RPS26
rs705704	DERA	1.98e-05	PMA	Ram	trans	12q13.2	56435412	G|A	RPS26
rs705704	TBL1X	2.38e-05	PMA	Ram	trans	12q13.2	56435412	G|A	RPS26
rs705704	RPS26P11	9.61e-29	PMA	Ram	trans	12q13.2	56435412	G|A	RPS26
rs705704	LOC728823	2.71e-27	PMA	Ram	trans	12q13.2	56435412	G|A	RPS26
rs705704	LOC641768	5.34e-25	PMA	Ram	trans	12q13.2	56435412	G|A	RPS26
rs705704	LOC100129552	2.49e-24	PMA	Ram	trans	12q13.2	56435412	G|A	RPS26
rs705704	RPS26P10	5.84e-21	PMA	Ram	trans	12q13.2	56435412	G|A	RPS26
[truncated: 2,403 more rows]
